# Supplementary material
Source: publisher figshare collection journal article supplement (https://gsajournals.figshare.com/articles/dataset/_/7841036)
Supplement: Supplementary file 1 [file 1]

## Sheet: 6mA positions DGRP732
Chr	Start	End	% reads modified
2L	55922	55923	0.7627
2L	109673	109674	0.8039
2L	138213	138214	0.7931
2L	175603	175604	0.7021
2L	186859	186860	0.84
2L	198546	198547	0.7241
2L	222197	222198	0.7297
2L	230048	230049	0.7037
2L	234658	234659	0.7838
2L	277412	277413	0.8182
2L	279746	279747	0.8065
2L	279747	279748	0.8182
2L	281387	281388	0.7931
2L	341950	341951	0.8857
2L	363842	363843	0.7561
2L	376641	376642	0.8286
2L	383171	383172	0.7674
2L	438093	438094	0.7436
2L	461241	461242	0.7255
2L	473478	473479	0.7447
2L	482804	482805	0.8182
2L	555594	555595	0.7455
2L	596769	596770	0.8776
2L	599647	599648	0.76
2L	599648	599649	0.76
2L	599649	599650	0.7037
2L	599655	599656	0.8065
2L	599664	599665	0.8182
2L	610993	610994	0.8919
2L	615605	615606	0.7778
2L	625205	625206	0.8462
2L	625206	625207	0.8298
2L	625307	625308	0.8723
2L	626615	626616	0.8974
2L	638240	638241	0.7778
2L	650588	650589	0.8065
2L	650589	650590	0.8621
2L	650590	650591	0.8286
2L	651269	651270	0.7576
2L	654360	654361	0.7037
2L	654361	654362	0.7931
2L	655673	655674	0.7714
2L	671090	671091	0.8049
2L	671300	671301	0.7209
2L	681874	681875	0.9149
2L	681875	681876	0.9216
2L	684022	684023	0.8788
2L	694740	694741	0.7391
2L	697935	697936	0.7447
2L	700252	700253	0.871
2L	700253	700254	0.7391
2L	700305	700306	0.76
2L	700334	700335	0.8621
2L	714100	714101	0.84
2L	715910	715911	0.84
2L	756346	756347	0.7714
2L	832288	832289	0.7576
2L	834682	834683	0.7037
2L	839973	839974	0.9024
2L	843716	843717	0.8788
2L	866250	866251	0.7209
2L	885692	885693	0.8519
2L	888194	888195	0.7778
2L	900359	900360	0.9149
2L	956516	956517	0.7037
2L	958263	958264	0.7931
2L	961097	961098	0.8621
2L	1013128	1013129	0.7949
2L	1033918	1033919	0.7419
2L	1046228	1046229	0.7931
2L	1114760	1114761	0.7143
2L	1125367	1125368	0.8605
2L	1125368	1125369	0.8049
2L	1129709	1129710	0.7931
2L	1129711	1129712	0.8519
2L	1130302	1130303	0.8286
2L	1142071	1142072	0.7073
2L	1143900	1143901	0.7931
2L	1145546	1145547	0.8462
2L	1153306	1153307	0.7561
2L	1164005	1164006	0.7255
2L	1184350	1184351	0.871
2L	1187737	1187738	0.8182
2L	1200580	1200581	0.7931
2L	1203315	1203316	0.7576
2L	1203504	1203505	0.7143
2L	1204391	1204392	0.7838
2L	1208690	1208691	0.7297
2L	1208691	1208692	0.9149
2L	1208692	1208693	0.907
2L	1208860	1208861	0.814
2L	1209164	1209165	0.9149
2L	1209165	1209166	0.7838
2L	1210746	1210747	0.8182
2L	1236173	1236174	0.7143
2L	1236174	1236175	0.7895
2L	1237164	1237165	0.7895
2L	1252232	1252233	0.7241
2L	1283382	1283383	0.871
2L	1284000	1284001	0.8857
2L	1284052	1284053	0.8776
2L	1284149	1284150	0.9024
2L	1287903	1287904	0.76
2L	1287904	1287905	0.9149
2L	1305308	1305309	0.7714
2L	1321580	1321581	0.8788
2L	1330249	1330250	0.7576
2L	1333159	1333160	0.9184
2L	1335412	1335413	0.8621
2L	1336150	1336151	0.7778
2L	1337790	1337791	0.7714
2L	1374392	1374393	0.7576
2L	1392565	1392566	0.7419
2L	1392567	1392568	0.7241
2L	1393297	1393298	0.7241
2L	1410435	1410436	0.7241
2L	1411769	1411770	0.7561
2L	1418782	1418783	0.7949
2L	1441330	1441331	0.8065
2L	1453090	1453091	0.8286
2L	1468421	1468422	0.8286
2L	1498690	1498691	0.8621
2L	1502653	1502654	0.7419
2L	1503724	1503725	0.7037
2L	1512667	1512668	0.7143
2L	1514645	1514646	0.8095
2L	1517996	1517997	0.8723
2L	1523355	1523356	0.7143
2L	1554851	1554852	0.7037
2L	1555784	1555785	0.7037
2L	1559514	1559515	0.7297
2L	1563565	1563566	0.7447
2L	1570782	1570783	0.8049
2L	1571293	1571294	0.7714
2L	1571294	1571295	0.7714
2L	1580139	1580140	0.7419
2L	1581834	1581835	0.7576
2L	1582665	1582666	0.7778
2L	1583536	1583537	0.8065
2L	1588624	1588625	0.8857
2L	1588625	1588626	0.8286
2L	1598811	1598812	0.7037
2L	1600926	1600927	0.76
2L	1702741	1702742	0.8788
2L	1716336	1716337	0.8095
2L	1760998	1760999	0.84
2L	1762043	1762044	0.8545
2L	1762464	1762465	0.7037
2L	1769729	1769730	0.871
2L	1770254	1770255	0.8378
2L	1771561	1771562	0.8621
2L	1772020	1772021	0.7778
2L	1791034	1791035	0.8462
2L	1802850	1802851	0.7736
2L	1811704	1811705	0.8261
2L	1818648	1818649	0.7455
2L	1821025	1821026	0.7358
2L	1849483	1849484	0.84
2L	1849484	1849485	0.8519
2L	1850950	1850951	0.8182
2L	1854776	1854777	0.7037
2L	1855557	1855558	0.8919
2L	1862441	1862442	0.7436
2L	1872469	1872470	0.7391
2L	1872486	1872487	0.7419
2L	1882524	1882525	0.7959
2L	1882525	1882526	0.8367
2L	1931249	1931250	0.76
2L	1934227	1934228	0.8974
2L	1934838	1934839	0.84
2L	1997114	1997115	0.7241
2L	2014327	2014328	0.8788
2L	2019927	2019928	0.8857
2L	2021256	2021257	0.7391
2L	2021660	2021661	0.7436
2L	2021983	2021984	0.7241
2L	2021984	2021985	0.7576
2L	2021985	2021986	0.7241
2L	2027090	2027091	0.8947
2L	2039781	2039782	0.7021
2L	2039782	2039783	0.7949
2L	2064649	2064650	0.8182
2L	2064650	2064651	0.8182
2L	2081161	2081162	0.7037
2L	2081162	2081163	0.7241
2L	2083994	2083995	0.8857
2L	2117334	2117335	0.7143
2L	2119023	2119024	0.8983
2L	2119655	2119656	0.8857
2L	2120633	2120634	0.9273
2L	2120717	2120718	0.7436
2L	2149310	2149311	0.7778
2L	2154191	2154192	0.7778
2L	2157712	2157713	0.7419
2L	2201164	2201165	0.7778
2L	2201209	2201210	0.7674
2L	2229083	2229084	0.7297
2L	2229085	2229086	0.7241
2L	2236412	2236413	0.9184
2L	2301442	2301443	0.7561
2L	2302119	2302120	0.871
2L	2302798	2302799	0.7297
2L	2335958	2335959	0.7241
2L	2345780	2345781	0.84
2L	2349614	2349615	0.8519
2L	2364486	2364487	0.7778
2L	2384226	2384227	0.8182
2L	2400792	2400793	0.7576
2L	2410008	2410009	0.7561
2L	2413230	2413231	0.7931
2L	2425454	2425455	0.871
2L	2430914	2430915	0.7143
2L	2444530	2444531	0.907
2L	2445043	2445044	0.9273
2L	2452802	2452803	0.7241
2L	2460743	2460744	0.8857
2L	2461148	2461149	0.8286
2L	2462410	2462411	0.7419
2L	2478997	2478998	0.7391
2L	2481738	2481739	0.8621
2L	2481742	2481743	0.76
2L	2481862	2481863	0.7714
2L	2482635	2482636	0.7714
2L	2486794	2486795	0.7931
2L	2512905	2512906	0.7931
2L	2527771	2527772	0.76
2L	2541136	2541137	0.8261
2L	2582734	2582735	0.7647
2L	2585754	2585755	0.7037
2L	2588149	2588150	0.8378
2L	2598740	2598741	0.7143
2L	2602385	2602386	0.7391
2L	2602389	2602390	0.7778
2L	2604289	2604290	0.76
2L	2612902	2612903	0.8378
2L	2620304	2620305	0.7297
2L	2621547	2621548	0.8462
2L	2626357	2626358	0.7143
2L	2626358	2626359	0.7143
2L	2628563	2628564	0.8919
2L	2680404	2680405	0.7838
2L	2680413	2680414	0.7297
2L	2681096	2681097	0.7778
2L	2685775	2685776	0.8519
2L	2712454	2712455	0.7576
2L	2713480	2713481	0.7241
2L	2716732	2716733	0.8519
2L	2718298	2718299	0.8065
2L	2718299	2718300	0.8286
2L	2719744	2719745	0.8182
2L	2722551	2722552	0.7037
2L	2722552	2722553	0.7241
2L	2726398	2726399	0.871
2L	2727233	2727234	0.9024
2L	2727234	2727235	0.907
2L	2727477	2727478	0.7931
2L	2774588	2774589	0.7714
2L	2822030	2822031	0.7778
2L	2826544	2826545	0.8049
2L	2833226	2833227	0.7241
2L	2833227	2833228	0.8519
2L	2952416	2952417	0.8367
2L	2954669	2954670	0.7021
2L	2964076	2964077	0.7037
2L	2972752	2972753	0.7297
2L	2973741	2973742	0.8065
2L	2984058	2984059	0.8519
2L	2985110	2985111	0.7209
2L	2985587	2985588	0.7333
2L	2989236	2989237	0.8286
2L	2993253	2993254	0.7419
2L	2995538	2995539	0.7241
2L	3003635	3003636	0.7037
2L	3007406	3007407	0.7838
2L	3031839	3031840	0.7674
2L	3040088	3040089	0.7576
2L	3055298	3055299	0.7419
2L	3089922	3089923	0.7895
2L	3091981	3091982	0.7778
2L	3112825	3112826	0.8095
2L	3125796	3125797	0.7037
2L	3146159	3146160	0.7714
2L	3146622	3146623	0.8065
2L	3146623	3146624	0.76
2L	3148069	3148070	0.7297
2L	3155969	3155970	0.8095
2L	3156645	3156646	0.7241
2L	3156646	3156647	0.7241
2L	3157238	3157239	0.7241
2L	3179577	3179578	0.814
2L	3181147	3181148	0.8182
2L	3190315	3190316	0.8857
2L	3190516	3190517	0.8919
2L	3192761	3192762	0.8182
2L	3192762	3192763	0.8519
2L	3200268	3200269	0.7297
2L	3201101	3201102	0.7143
2L	3201301	3201302	0.8286
2L	3207422	3207423	0.7037
2L	3207424	3207425	0.7419
2L	3221442	3221443	0.84
2L	3257731	3257732	0.8462
2L	3261861	3261862	0.7931
2L	3262387	3262388	0.8621
2L	3268676	3268677	0.8182
2L	3274325	3274326	0.7931
2L	3274326	3274327	0.8788
2L	3275126	3275127	0.8222
2L	3275160	3275161	0.7073
2L	3295202	3295203	0.7241
2L	3296133	3296134	0.7647
2L	3305248	3305249	0.7037
2L	3305249	3305250	0.7931
2L	3305250	3305251	0.7778
2L	3305347	3305348	0.7778
2L	3306488	3306489	0.7931
2L	3311035	3311036	0.7778
2L	3356318	3356319	0.7714
2L	3357181	3357182	0.8605
2L	3412261	3412262	0.7931
2L	3412613	3412614	0.8537
2L	3418084	3418085	0.8261
2L	3432851	3432852	0.8182
2L	3433674	3433675	0.7778
2L	3436991	3436992	0.84
2L	3437467	3437468	0.7576
2L	3463216	3463217	0.8049
2L	3463218	3463219	0.7143
2L	3465346	3465347	0.9111
2L	3487800	3487801	0.7037
2L	3506108	3506109	0.7714
2L	3507139	3507140	0.76
2L	3525746	3525747	0.7297
2L	3531231	3531232	0.7931
2L	3535005	3535006	0.8378
2L	3544915	3544916	0.7037
2L	3547102	3547103	0.7143
2L	3548269	3548270	0.7714
2L	3559293	3559294	0.8667
2L	3561979	3561980	0.8919
2L	3569713	3569714	0.7037
2L	3574547	3574548	0.8919
2L	3574548	3574549	0.871
2L	3577580	3577581	0.8378
2L	3582499	3582500	0.7241
2L	3609768	3609769	0.76
2L	3620376	3620377	0.7647
2L	3622503	3622504	0.8519
2L	3625788	3625789	0.8974
2L	3625904	3625905	0.8788
2L	3629097	3629098	0.8519
2L	3629647	3629648	0.7778
2L	3650422	3650423	0.8049
2L	3682466	3682467	0.7391
2L	3688232	3688233	0.7241
2L	3692196	3692197	0.7143
2L	3698089	3698090	0.8519
2L	3699121	3699122	0.8095
2L	3699277	3699278	0.8095
2L	3700017	3700018	0.7037
2L	3711385	3711386	0.7391
2L	3713039	3713040	0.7037
2L	3714784	3714785	0.9024
2L	3725410	3725411	0.7143
2L	3725411	3725412	0.7391
2L	3725412	3725413	0.7143
2L	3743064	3743065	0.84
2L	3743065	3743066	0.871
2L	3743066	3743067	0.7391
2L	3746408	3746409	0.8519
2L	3746410	3746411	0.8621
2L	3760181	3760182	0.8182
2L	3762708	3762709	0.8621
2L	3770009	3770010	0.7241
2L	3778619	3778620	0.7949
2L	3791588	3791589	0.7647
2L	3803695	3803696	0.7447
2L	3805312	3805313	0.7714
2L	3806729	3806730	0.8605
2L	3808601	3808602	0.8065
2L	3811122	3811123	0.8974
2L	3811123	3811124	0.7436
2L	3811434	3811435	0.7241
2L	3812664	3812665	0.7949
2L	3825867	3825868	0.7949
2L	3840202	3840203	0.7576
2L	3842089	3842090	0.8519
2L	3844722	3844723	0.7143
2L	3851562	3851563	0.7021
2L	3875567	3875568	0.8605
2L	3883660	3883661	0.7419
2L	3888086	3888087	0.8621
2L	3888646	3888647	0.7714
2L	3899610	3899611	0.7561
2L	3911477	3911478	0.7436
2L	3933577	3933578	0.7391
2L	3955129	3955130	0.8182
2L	3957989	3957990	0.7838
2L	3977998	3977999	0.7778
2L	3997804	3997805	0.7419
2L	4001996	4001997	0.8065
2L	4028370	4028371	0.7241
2L	4032507	4032508	0.7931
2L	4032509	4032510	0.8261
2L	4037144	4037145	0.7143
2L	4040007	4040008	0.7037
2L	4084895	4084896	0.84
2L	4084899	4084900	0.76
2L	4119332	4119333	0.7297
2L	4123502	4123503	0.7037
2L	4123505	4123506	0.7714
2L	4132118	4132119	0.7209
2L	4139035	4139036	0.8667
2L	4142711	4142712	0.7209
2L	4143557	4143558	0.7931
2L	4154678	4154679	0.7895
2L	4163167	4163168	0.871
2L	4180835	4180836	0.7419
2L	4180848	4180849	0.7037
2L	4201181	4201182	0.8909
2L	4203026	4203027	0.8605
2L	4218207	4218208	0.7576
2L	4225161	4225162	0.7037
2L	4229025	4229026	0.8621
2L	4229278	4229279	0.7949
2L	4282231	4282232	0.8065
2L	4290489	4290490	0.907
2L	4292367	4292368	0.7931
2L	4293064	4293065	0.7391
2L	4296732	4296733	0.84
2L	4299002	4299003	0.7576
2L	4300103	4300104	0.76
2L	4332350	4332351	0.8049
2L	4356506	4356507	0.7931
2L	4357051	4357052	0.84
2L	4479729	4479730	0.7778
2L	4511576	4511577	0.7778
2L	4515001	4515002	0.7576
2L	4532034	4532035	0.84
2L	4555104	4555105	0.7037
2L	4566768	4566769	0.7143
2L	4568725	4568726	0.84
2L	4574926	4574927	0.7838
2L	4577977	4577978	0.7209
2L	4579297	4579298	0.7778
2L	4579664	4579665	0.9149
2L	4602822	4602823	0.7037
2L	4610984	4610985	0.7073
2L	4614085	4614086	0.7576
2L	4616018	4616019	0.7143
2L	4618925	4618926	0.7143
2L	4618926	4618927	0.7297
2L	4633853	4633854	0.84
2L	4633854	4633855	0.8261
2L	4651202	4651203	0.7297
2L	4660282	4660283	0.8974
2L	4660947	4660948	0.8182
2L	4660948	4660949	0.8182
2L	4661195	4661196	0.7714
2L	4661196	4661197	0.8919
2L	4661197	4661198	0.7931
2L	4661471	4661472	0.7714
2L	4665093	4665094	0.7143
2L	4666767	4666768	0.7447
2L	4714900	4714901	0.8974
2L	4752061	4752062	0.8065
2L	4755345	4755346	0.7391
2L	4756850	4756851	0.8857
2L	4757560	4757561	0.7143
2L	4758324	4758325	0.7419
2L	4769730	4769731	0.7949
2L	4774129	4774130	0.8537
2L	4774163	4774164	0.9216
2L	4774545	4774546	0.8065
2L	4775284	4775285	0.7838
2L	4808907	4808908	0.7037
2L	4818489	4818490	0.7391
2L	4824733	4824734	0.7714
2L	4874608	4874609	0.7241
2L	4874870	4874871	0.7674
2L	4874908	4874909	0.7037
2L	4926244	4926245	0.7931
2L	4926245	4926246	0.8261
2L	4939698	4939699	0.8261
2L	4954560	4954561	0.8095
2L	4954651	4954652	0.7778
2L	4954652	4954653	0.8621
2L	4954653	4954654	0.8621
2L	4954911	4954912	0.7647
2L	4957616	4957617	0.7778
2L	4957941	4957942	0.84
2L	4983125	4983126	0.8519
2L	4990540	4990541	0.7576
2L	4997501	4997502	0.8378
2L	4997504	4997505	0.8065
2L	5008564	5008565	0.7872
2L	5008565	5008566	0.8667
2L	5008566	5008567	0.907
2L	5008567	5008568	0.9024
2L	5010949	5010950	0.8919
2L	5021927	5021928	0.8286
2L	5037567	5037568	0.8519
2L	5070220	5070221	0.7419
2L	5073745	5073746	0.8462
2L	5073746	5073747	0.7561
2L	5075443	5075444	0.8378
2L	5087355	5087356	0.8222
2L	5119773	5119774	0.8298
2L	5125876	5125877	0.7143
2L	5125877	5125878	0.7143
2L	5156332	5156333	0.84
2L	5191280	5191281	0.7714
2L	5193164	5193165	0.8621
2L	5194358	5194359	0.8621
2L	5196018	5196019	0.8857
2L	5204278	5204279	0.7419
2L	5204308	5204309	0.8286
2L	5204309	5204310	0.8919
2L	5204314	5204315	0.7037
2L	5204719	5204720	0.7419
2L	5208074	5208075	0.8462
2L	5208378	5208379	0.7037
2L	5222796	5222797	0.7576
2L	5224148	5224149	0.8286
2L	5233433	5233434	0.7778
2L	5236754	5236755	0.7391
2L	5240222	5240223	0.8095
2L	5243498	5243499	0.8182
2L	5256971	5256972	0.8621
2L	5259337	5259338	0.7576
2L	5285216	5285217	0.7838
2L	5289395	5289396	0.8065
2L	5299297	5299298	0.7297
2L	5308202	5308203	0.7143
2L	5312276	5312277	0.8519
2L	5313899	5313900	0.7297
2L	5317080	5317081	0.9216
2L	5317169	5317170	0.8723
2L	5332321	5332322	0.8788
2L	5348148	5348149	0.7931
2L	5365452	5365453	0.7037
2L	5376285	5376286	0.7576
2L	5377641	5377642	0.8261
2L	5377643	5377644	0.7391
2L	5377886	5377887	0.8519
2L	5409363	5409364	0.8621
2L	5410945	5410946	0.7436
2L	5427204	5427205	0.871
2L	5432737	5432738	0.7241
2L	5432998	5432999	0.8788
2L	5433049	5433050	0.8919
2L	5433058	5433059	0.8182
2L	5433095	5433096	0.8621
2L	5444281	5444282	0.9149
2L	5455052	5455053	0.8667
2L	5468671	5468672	0.8378
2L	5469314	5469315	0.7037
2L	5481804	5481805	0.7778
2L	5489828	5489829	0.7931
2L	5491089	5491090	0.8788
2L	5505178	5505179	0.8182
2L	5505180	5505181	0.7143
2L	5513333	5513334	0.8095
2L	5517139	5517140	0.7576
2L	5531207	5531208	0.8182
2L	5531281	5531282	0.8049
2L	5539507	5539508	0.7419
2L	5539508	5539509	0.8182
2L	5540751	5540752	0.8065
2L	5547509	5547510	0.7391
2L	5553373	5553374	0.7576
2L	5565502	5565503	0.7241
2L	5633059	5633060	0.8378
2L	5633060	5633061	0.7714
2L	5633063	5633064	0.7436
2L	5633064	5633065	0.8049
2L	5636406	5636407	0.7209
2L	5643050	5643051	0.7436
2L	5655054	5655055	0.8065
2L	5659691	5659692	0.7391
2L	5662119	5662120	0.8462
2L	5676064	5676065	0.76
2L	5681760	5681761	0.7143
2L	5682075	5682076	0.7931
2L	5683220	5683221	0.8519
2L	5694348	5694349	0.8857
2L	5694349	5694350	0.8182
2L	5705405	5705406	0.7241
2L	5745713	5745714	0.8519
2L	5746849	5746850	0.7391
2L	5748180	5748181	0.8049
2L	5760812	5760813	0.8065
2L	5761922	5761923	0.7143
2L	5768323	5768324	0.7838
2L	5769080	5769081	0.8049
2L	5778485	5778486	0.7143
2L	5779919	5779920	0.8788
2L	5792030	5792031	0.8519
2L	5793190	5793191	0.7143
2L	5793439	5793440	0.84
2L	5793861	5793862	0.8286
2L	5795442	5795443	0.84
2L	5832157	5832158	0.8286
2L	5884223	5884224	0.7297
2L	5885420	5885421	0.7419
2L	5885421	5885422	0.8286
2L	5885771	5885772	0.8462
2L	5984001	5984002	0.7576
2L	5989487	5989488	0.7872
2L	5989515	5989516	0.8667
2L	5993431	5993432	0.7297
2L	5993633	5993634	0.8621
2L	6002204	6002205	0.8667
2L	6003253	6003254	0.7838
2L	6048068	6048069	0.7037
2L	6049159	6049160	0.7419
2L	6049271	6049272	0.84
2L	6056784	6056785	0.7037
2L	6112465	6112466	0.7391
2L	6119515	6119516	0.8095
2L	6121507	6121508	0.7073
2L	6122392	6122393	0.7143
2L	6126240	6126241	0.7143
2L	6148982	6148983	0.8286
2L	6150471	6150472	0.8182
2L	6158085	6158086	0.8519
2L	6173147	6173148	0.8065
2L	6201457	6201458	0.7714
2L	6203454	6203455	0.8857
2L	6207090	6207091	0.7297
2L	6266345	6266346	0.8919
2L	6269700	6269701	0.7419
2L	6270882	6270883	0.7037
2L	6271915	6271916	0.8788
2L	6280249	6280250	0.7037
2L	6374414	6374415	0.8857
2L	6374415	6374416	0.7419
2L	6375182	6375183	0.7037
2L	6377700	6377701	0.7778
2L	6414079	6414080	0.8298
2L	6416537	6416538	0.9344
2L	6417043	6417044	0.8113
2L	6417044	6417045	0.8491
2L	6420530	6420531	0.7778
2L	6420647	6420648	0.8537
2L	6422035	6422036	0.8491
2L	6423165	6423166	0.7561
2L	6426391	6426392	0.7714
2L	6426426	6426427	0.871
2L	6430924	6430925	0.7838
2L	6433385	6433386	0.907
2L	6438340	6438341	0.8621
2L	6438342	6438343	0.7419
2L	6456203	6456204	0.7419
2L	6461135	6461136	0.7241
2L	6470708	6470709	0.7241
2L	6473135	6473136	0.8182
2L	6473136	6473137	0.8857
2L	6473137	6473138	0.8182
2L	6473138	6473139	0.7419
2L	6485675	6485676	0.8605
2L	6495658	6495659	0.8286
2L	6495659	6495660	0.8261
2L	6495660	6495661	0.7778
2L	6497122	6497123	0.7576
2L	6521099	6521100	0.9111
2L	6521365	6521366	0.7209
2L	6562355	6562356	0.7778
2L	6578657	6578658	0.8095
2L	6582634	6582635	0.9111
2L	6589346	6589347	0.8378
2L	6618752	6618753	0.7037
2L	6632437	6632438	0.8095
2L	6634842	6634843	0.8621
2L	6635585	6635586	0.7419
2L	6635767	6635768	0.9024
2L	6652783	6652784	0.7333
2L	6680822	6680823	0.8857
2L	6683286	6683287	0.7647
2L	6684989	6684990	0.7143
2L	6722905	6722906	0.7241
2L	6749807	6749808	0.7073
2L	6762015	6762016	0.7391
2L	6776686	6776687	0.8286
2L	6777587	6777588	0.7436
2L	6781318	6781319	0.871
2L	6824295	6824296	0.8621
2L	6824296	6824297	0.8857
2L	6830128	6830129	0.907
2L	6856186	6856187	0.7714
2L	6856601	6856602	0.7037
2L	6859280	6859281	0.8378
2L	6875092	6875093	0.8776
2L	6875476	6875477	0.8519
2L	6878969	6878970	0.7241
2L	6878970	6878971	0.8182
2L	6931121	6931122	0.7436
2L	6937218	6937219	0.7746
2L	6937219	6937220	0.7681
2L	6944268	6944269	0.7436
2L	6944270	6944271	0.7714
2L	6960924	6960925	0.8919
2L	6974883	6974884	0.8182
2L	6980498	6980499	0.7576
2L	7023528	7023529	0.8182
2L	7038652	7038653	0.8039
2L	7048209	7048210	0.8596
2L	7052750	7052751	0.907
2L	7059871	7059872	0.7576
2L	7076789	7076790	0.7419
2L	7076799	7076800	0.7714
2L	7093220	7093221	0.7037
2L	7095475	7095476	0.8919
2L	7114068	7114069	0.7241
2L	7114872	7114873	0.8857
2L	7115196	7115197	0.76
2L	7121410	7121411	0.7419
2L	7127816	7127817	0.8545
2L	7127819	7127820	0.7436
2L	7153368	7153369	0.871
2L	7156836	7156837	0.8857
2L	7156837	7156838	0.8261
2L	7164096	7164097	0.7037
2L	7198511	7198512	0.7391
2L	7201198	7201199	0.7073
2L	7208450	7208451	0.7037
2L	7224501	7224502	0.7037
2L	7226038	7226039	0.7037
2L	7227751	7227752	0.7576
2L	7234241	7234242	0.7143
2L	7236332	7236333	0.8065
2L	7236333	7236334	0.7391
2L	7268834	7268835	0.7021
2L	7270089	7270090	0.7931
2L	7278019	7278020	0.9111
2L	7292297	7292298	0.8065
2L	7314630	7314631	0.8182
2L	7319054	7319055	0.7674
2L	7328956	7328957	0.814
2L	7335751	7335752	0.7333
2L	7351167	7351168	0.8065
2L	7353471	7353472	0.871
2L	7363442	7363443	0.7037
2L	7363869	7363870	0.7037
2L	7379216	7379217	0.8919
2L	7379428	7379429	0.7419
2L	7379719	7379720	0.907
2L	7390219	7390220	0.8049
2L	7391290	7391291	0.7949
2L	7393414	7393415	0.8378
2L	7405797	7405798	0.8537
2L	7420579	7420580	0.7436
2L	7444845	7444846	0.7241
2L	7445564	7445565	0.8095
2L	7445780	7445781	0.8974
2L	7446480	7446481	0.8286
2L	7452636	7452637	0.8919
2L	7453740	7453741	0.8537
2L	7467584	7467585	0.7838
2L	7469250	7469251	0.7037
2L	7478841	7478842	0.7838
2L	7489411	7489412	0.76
2L	7491288	7491289	0.7419
2L	7497252	7497253	0.8298
2L	7505712	7505713	0.7931
2L	7507109	7507110	0.7241
2L	7512891	7512892	0.7778
2L	7519598	7519599	0.7143
2L	7522112	7522113	0.871
2L	7528569	7528570	0.907
2L	7532149	7532150	0.8049
2L	7533200	7533201	0.7209
2L	7533824	7533825	0.7143
2L	7534828	7534829	0.8065
2L	7534829	7534830	0.8182
2L	7537076	7537077	0.9024
2L	7538288	7538289	0.7931
2L	7571805	7571806	0.7143
2L	7582604	7582605	0.7143
2L	7591403	7591404	0.8378
2L	7602043	7602044	0.7241
2L	7606999	7607000	0.7778
2L	7635862	7635863	0.8065
2L	7636304	7636305	0.8519
2L	7636307	7636308	0.7037
2L	7636963	7636964	0.8065
2L	7640002	7640003	0.7959
2L	7643250	7643251	0.7241
2L	7646225	7646226	0.7931
2L	7646226	7646227	0.8621
2L	7658286	7658287	0.8286
2L	7667649	7667650	0.7143
2L	7673940	7673941	0.7143
2L	7673942	7673943	0.8788
2L	7684849	7684850	0.7419
2L	7750956	7750957	0.8462
2L	7751605	7751606	0.8286
2L	7751606	7751607	0.7576
2L	7762038	7762039	0.8974
2L	7762376	7762377	0.7778
2L	7768027	7768028	0.7436
2L	7780910	7780911	0.7037
2L	7787098	7787099	0.8378
2L	7812369	7812370	0.7436
2L	7821949	7821950	0.7714
2L	7846097	7846098	0.8378
2L	7869660	7869661	0.7391
2L	7889945	7889946	0.9111
2L	7891285	7891286	0.7576
2L	7897843	7897844	0.7778
2L	7928344	7928345	0.7209
2L	7928513	7928514	0.8857
2L	7950260	7950261	0.7419
2L	7952250	7952251	0.7297
2L	7953287	7953288	0.8519
2L	7957885	7957886	0.7778
2L	7975923	7975924	0.7714
2L	7979067	7979068	0.7436
2L	7990733	7990734	0.7576
2L	7992294	7992295	0.84
2L	7992760	7992761	0.7931
2L	8014243	8014244	0.8065
2L	8021744	8021745	0.7778
2L	8032144	8032145	0.871
2L	8033915	8033916	0.7436
2L	8053758	8053759	0.7576
2L	8063551	8063552	0.7576
2L	8063556	8063557	0.7391
2L	8067895	8067896	0.7143
2L	8113410	8113411	0.8378
2L	8122965	8122966	0.9184
2L	8124480	8124481	0.8462
2L	8128286	8128287	0.7714
2L	8140774	8140775	0.7241
2L	8152725	8152726	0.9184
2L	8152726	8152727	0.907
2L	8158249	8158250	0.7073
2L	8177038	8177039	0.7391
2L	8231918	8231919	0.8621
2L	8232494	8232495	0.7143
2L	8243550	8243551	0.7714
2L	8245820	8245821	0.7297
2L	8246311	8246312	0.7576
2L	8271911	8271912	0.8182
2L	8272987	8272988	0.7931
2L	8301915	8301916	0.7241
2L	8340751	8340752	0.7714
2L	8340977	8340978	0.7838
2L	8342037	8342038	0.8286
2L	8362969	8362970	0.7838
2L	8370096	8370097	0.8519
2L	8378929	8378930	0.8378
2L	8390916	8390917	0.7143
2L	8392495	8392496	0.8462
2L	8392496	8392497	0.7297
2L	8393826	8393827	0.8919
2L	8395224	8395225	0.7959
2L	8395226	8395227	0.8491
2L	8395227	8395228	0.7872
2L	8410080	8410081	0.8378
2L	8410081	8410082	0.7949
2L	8410960	8410961	0.7436
2L	8410961	8410962	0.9024
2L	8410962	8410963	0.8788
2L	8445132	8445133	0.8723
2L	8456819	8456820	0.7209
2L	8480659	8480660	0.8182
2L	8505204	8505205	0.814
2L	8532082	8532083	0.7241
2L	8532085	8532086	0.8621
2L	8533205	8533206	0.7714
2L	8536555	8536556	0.8868
2L	8536556	8536557	0.8491
2L	8538369	8538370	0.907
2L	8557697	8557698	0.8065
2L	8563576	8563577	0.8776
2L	8565218	8565219	0.8286
2L	8568257	8568258	0.7391
2L	8568476	8568477	0.7391
2L	8569609	8569610	0.7714
2L	8569806	8569807	0.7576
2L	8576896	8576897	0.7419
2L	8580165	8580166	0.907
2L	8581075	8581076	0.7949
2L	8581076	8581077	0.8605
2L	8581119	8581120	0.7674
2L	8583252	8583253	0.7073
2L	8584152	8584153	0.7391
2L	8586045	8586046	0.7297
2L	8588534	8588535	0.8621
2L	8592188	8592189	0.7627
2L	8603335	8603336	0.8049
2L	8605726	8605727	0.7021
2L	8612545	8612546	0.7931
2L	8617619	8617620	0.7576
2L	8625051	8625052	0.7143
2L	8652724	8652725	0.7895
2L	8666867	8666868	0.8974
2L	8667096	8667097	0.7037
2L	8678734	8678735	0.8298
2L	8678737	8678738	0.8519
2L	8694525	8694526	0.7391
2L	8694676	8694677	0.8378
2L	8698992	8698993	0.7091
2L	8714115	8714116	0.7778
2L	8725870	8725871	0.8462
2L	8725883	8725884	0.8723
2L	8743109	8743110	0.8723
2L	8746396	8746397	0.7959
2L	8752792	8752793	0.8367
2L	8799673	8799674	0.814
2L	8800389	8800390	0.8222
2L	8802494	8802495	0.7209
2L	8803146	8803147	0.7627
2L	8804989	8804990	0.7143
2L	8811984	8811985	0.8462
2L	8822139	8822140	0.7143
2L	8822140	8822141	0.8298
2L	8823557	8823558	0.7333
2L	8829815	8829816	0.8776
2L	8830590	8830591	0.8049
2L	8835101	8835102	0.8462
2L	8845869	8845870	0.7576
2L	8847608	8847609	0.8974
2L	8848133	8848134	0.871
2L	8848167	8848168	0.7143
2L	8854060	8854061	0.7241
2L	8854195	8854196	0.8919
2L	8854908	8854909	0.7576
2L	8855558	8855559	0.7037
2L	8857060	8857061	0.7576
2L	8858467	8858468	0.7073
2L	8860231	8860232	0.7949
2L	8860323	8860324	0.8519
2L	8861878	8861879	0.7333
2L	8862403	8862404	0.871
2L	8862841	8862842	0.7436
2L	8864286	8864287	0.7419
2L	8873954	8873955	0.8857
2L	8880076	8880077	0.9149
2L	8881476	8881477	0.871
2L	8883766	8883767	0.84
2L	8901282	8901283	0.8286
2L	8902098	8902099	0.8182
2L	8904947	8904948	0.7419
2L	8910645	8910646	0.7333
2L	8934490	8934491	0.7297
2L	8938510	8938511	0.7209
2L	8938528	8938529	0.7297
2L	8946007	8946008	0.7333
2L	8978766	8978767	0.8621
2L	8978851	8978852	0.8621
2L	8979674	8979675	0.84
2L	8981557	8981558	0.7143
2L	8982875	8982876	0.8182
2L	8985369	8985370	0.7931
2L	8992698	8992699	0.7419
2L	8995956	8995957	0.7931
2L	9003190	9003191	0.7143
2L	9004752	9004753	0.7895
2L	9007990	9007991	0.7391
2L	9013409	9013410	0.7561
2L	9021043	9021044	0.7838
2L	9022698	9022699	0.8039
2L	9025374	9025375	0.7297
2L	9026504	9026505	0.8286
2L	9026506	9026507	0.8378
2L	9026507	9026508	0.7241
2L	9026794	9026795	0.7037
2L	9027461	9027462	0.7576
2L	9027506	9027507	0.7551
2L	9027508	9027509	0.8049
2L	9029671	9029672	0.7838
2L	9033419	9033420	0.7959
2L	9052826	9052827	0.7143
2L	9053274	9053275	0.7333
2L	9057348	9057349	0.76
2L	9057350	9057351	0.7297
2L	9057945	9057946	0.7931
2L	9058889	9058890	0.7037
2L	9065778	9065779	0.814
2L	9066442	9066443	0.7037
2L	9067951	9067952	0.8857
2L	9116138	9116139	0.8857
2L	9116141	9116142	0.7778
2L	9140726	9140727	0.8788
2L	9140727	9140728	0.8378
2L	9143259	9143260	0.7714
2L	9147817	9147818	0.7931
2L	9147818	9147819	0.8182
2L	9147893	9147894	0.8286
2L	9156952	9156953	0.7895
2L	9161039	9161040	0.7297
2L	9161044	9161045	0.7297
2L	9162929	9162930	0.8621
2L	9163211	9163212	0.7838
2L	9165663	9165664	0.7209
2L	9167365	9167366	0.7455
2L	9168077	9168078	0.7193
2L	9168078	9168079	0.7627
2L	9169765	9169766	0.7073
2L	9181268	9181269	0.7419
2L	9181988	9181989	0.8261
2L	9182161	9182162	0.76
2L	9182782	9182783	0.76
2L	9183221	9183222	0.7576
2L	9183246	9183247	0.7037
2L	9194646	9194647	0.7209
2L	9196762	9196763	0.871
2L	9235838	9235839	0.7241
2L	9237813	9237814	0.8605
2L	9251921	9251922	0.8723
2L	9252141	9252142	0.871
2L	9252142	9252143	0.871
2L	9255360	9255361	0.8065
2L	9256499	9256500	0.7241
2L	9268110	9268111	0.7576
2L	9295892	9295893	0.7143
2L	9297557	9297558	0.7561
2L	9297559	9297560	0.7241
2L	9301694	9301695	0.7073
2L	9303063	9303064	0.7778
2L	9325310	9325311	0.7576
2L	9351325	9351326	0.8261
2L	9351327	9351328	0.8519
2L	9354971	9354972	0.7647
2L	9408901	9408902	0.8378
2L	9408902	9408903	0.8621
2L	9408905	9408906	0.8065
2L	9424025	9424026	0.8621
2L	9424129	9424130	0.8857
2L	9425829	9425830	0.8182
2L	9436657	9436658	0.7143
2L	9436659	9436660	0.7241
2L	9437986	9437987	0.7391
2L	9440089	9440090	0.8261
2L	9440334	9440335	0.7576
2L	9441734	9441735	0.7419
2L	9442071	9442072	0.8462
2L	9446322	9446323	0.7241
2L	9448005	9448006	0.76
2L	9448562	9448563	0.7778
2L	9450285	9450286	0.8857
2L	9457230	9457231	0.8182
2L	9469685	9469686	0.7949
2L	9490043	9490044	0.7333
2L	9494904	9494905	0.7436
2L	9495272	9495273	0.9149
2L	9495273	9495274	0.8222
2L	9495274	9495275	0.7073
2L	9503437	9503438	0.7255
2L	9503438	9503439	0.7818
2L	9527231	9527232	0.7931
2L	9550699	9550700	0.7931
2L	9557083	9557084	0.7436
2L	9557531	9557532	0.8182
2L	9596765	9596766	0.7037
2L	9628582	9628583	0.8537
2L	9635130	9635131	0.7241
2L	9635479	9635480	0.8065
2L	9641706	9641707	0.7255
2L	9660519	9660520	0.8788
2L	9660520	9660521	0.7391
2L	9667375	9667376	0.7143
2L	9672386	9672387	0.7143
2L	9684929	9684930	0.8519
2L	9684930	9684931	0.7931
2L	9684931	9684932	0.7241
2L	9694526	9694527	0.7931
2L	9703396	9703397	0.7576
2L	9709115	9709116	0.8378
2L	9709330	9709331	0.7037
2L	9710838	9710839	0.814
2L	9711201	9711202	0.7561
2L	9712515	9712516	0.7436
2L	9732008	9732009	0.9024
2L	9733223	9733224	0.9184
2L	9733225	9733226	0.8605
2L	9746372	9746373	0.7241
2L	9746374	9746375	0.7419
2L	9747647	9747648	0.907
2L	9750249	9750250	0.7931
2L	9757690	9757691	0.7561
2L	9775631	9775632	0.8788
2L	9789854	9789855	0.7143
2L	9812355	9812356	0.7714
2L	9817540	9817541	0.76
2L	9820970	9820971	0.8919
2L	9840416	9840417	0.7143
2L	9841210	9841211	0.7576
2L	9846807	9846808	0.7193
2L	9859673	9859674	0.7037
2L	9862259	9862260	0.7931
2L	9871617	9871618	0.7949
2L	9876459	9876460	0.7333
2L	9884100	9884101	0.7931
2L	9884103	9884104	0.871
2L	9894739	9894740	0.871
2L	9894740	9894741	0.871
2L	9895495	9895496	0.7931
2L	9895994	9895995	0.7037
2L	9962053	9962054	0.7037
2L	9964053	9964054	0.7419
2L	9969424	9969425	0.7838
2L	9996255	9996256	0.8462
2L	9996318	9996319	0.9024
2L	10010044	10010045	0.8462
2L	10013875	10013876	0.7895
2L	10020728	10020729	0.7714
2L	10021049	10021050	0.7037
2L	10059435	10059436	0.7714
2L	10059436	10059437	0.7949
2L	10059438	10059439	0.8857
2L	10059627	10059628	0.7297
2L	10060318	10060319	0.7436
2L	10060398	10060399	0.7561
2L	10095709	10095710	0.814
2L	10128589	10128590	0.7073
2L	10128590	10128591	0.7838
2L	10130920	10130921	0.8049
2L	10143994	10143995	0.7561
2L	10163442	10163443	0.7436
2L	10170223	10170224	0.9216
2L	10208679	10208680	0.7037
2L	10218070	10218071	0.7931
2L	10218071	10218072	0.8621
2L	10218072	10218073	0.8621
2L	10225437	10225438	0.8788
2L	10228016	10228017	0.7143
2L	10228017	10228018	0.7143
2L	10228018	10228019	0.7714
2L	10255638	10255639	0.7551
2L	10270247	10270248	0.8776
2L	10270259	10270260	0.7778
2L	10270263	10270264	0.814
2L	10270265	10270266	0.7209
2L	10285356	10285357	0.7143
2L	10290495	10290496	0.7447
2L	10290589	10290590	0.7838
2L	10293540	10293541	0.8537
2L	10295224	10295225	0.7143
2L	10312599	10312600	0.7959
2L	10317901	10317902	0.8857
2L	10318861	10318862	0.7714
2L	10318870	10318871	0.8049
2L	10326078	10326079	0.7931
2L	10329085	10329086	0.76
2L	10342113	10342114	0.7021
2L	10347956	10347957	0.7391
2L	10353951	10353952	0.7297
2L	10358697	10358698	0.907
2L	10359984	10359985	0.84
2L	10362632	10362633	0.84
2L	10362633	10362634	0.8519
2L	10365076	10365077	0.8261
2L	10375192	10375193	0.8286
2L	10375798	10375799	0.7297
2L	10387544	10387545	0.871
2L	10387985	10387986	0.7436
2L	10391880	10391881	0.8286
2L	10391931	10391932	0.9024
2L	10392629	10392630	0.7949
2L	10402731	10402732	0.8095
2L	10404395	10404396	0.7391
2L	10440203	10440204	0.7419
2L	10451541	10451542	0.7143
2L	10452801	10452802	0.7037
2L	10454653	10454654	0.7647
2L	10477368	10477369	0.8788
2L	10482112	10482113	0.871
2L	10483720	10483721	0.8261
2L	10549574	10549575	0.907
2L	10558628	10558629	0.7037
2L	10574370	10574371	0.7778
2L	10601076	10601077	0.7931
2L	10605707	10605708	0.7778
2L	10612049	10612050	0.7778
2L	10647159	10647160	0.8065
2L	10663831	10663832	0.7209
2L	10679488	10679489	0.76
2L	10680281	10680282	0.7647
2L	10716159	10716160	0.8857
2L	10751489	10751490	0.7895
2L	10759923	10759924	0.8788
2L	10759924	10759925	0.7037
2L	10777790	10777791	0.8065
2L	10780315	10780316	0.7674
2L	10780316	10780317	0.9024
2L	10782298	10782299	0.8286
2L	10797058	10797059	0.8462
2L	10797161	10797162	0.814
2L	10799008	10799009	0.7419
2L	10799085	10799086	0.8974
2L	10799086	10799087	0.9111
2L	10799087	10799088	0.8919
2L	10800287	10800288	0.8462
2L	10827248	10827249	0.7419
2L	10842795	10842796	0.8519
2L	10843675	10843676	0.8261
2L	11027250	11027251	0.8095
2L	11033588	11033589	0.7949
2L	11045901	11045902	0.7674
2L	11100191	11100192	0.8857
2L	11100192	11100193	0.8537
2L	11100439	11100440	0.8182
2L	11106594	11106595	0.7949
2L	11119373	11119374	0.8298
2L	11119374	11119375	0.7872
2L	11140611	11140612	0.7297
2L	11164365	11164366	0.7297
2L	11181231	11181232	0.8095
2L	11202869	11202870	0.8378
2L	11215150	11215151	0.7931
2L	11238420	11238421	0.8919
2L	11248585	11248586	0.8182
2L	11278770	11278771	0.7949
2L	11303146	11303147	0.8298
2L	11315535	11315536	0.7778
2L	11348022	11348023	0.7838
2L	11351688	11351689	0.7714
2L	11353644	11353645	0.8519
2L	11398041	11398042	0.9111
2L	11400927	11400928	0.7778
2L	11420717	11420718	0.9024
2L	11430557	11430558	0.7143
2L	11430620	11430621	0.7143
2L	11456164	11456165	0.84
2L	11461437	11461438	0.8378
2L	11461438	11461439	0.7143
2L	11469467	11469468	0.8182
2L	11473635	11473636	0.8182
2L	11486889	11486890	0.7838
2L	11490329	11490330	0.7714
2L	11491670	11491671	0.7073
2L	11491671	11491672	0.7647
2L	11505627	11505628	0.7576
2L	11522357	11522358	0.8788
2L	11567812	11567813	0.814
2L	11567813	11567814	0.7143
2L	11567913	11567914	0.8605
2L	11607794	11607795	0.8537
2L	11664080	11664081	0.8049
2L	11675093	11675094	0.7073
2L	11682408	11682409	0.8049
2L	11696527	11696528	0.814
2L	11705771	11705772	0.7241
2L	11719532	11719533	0.871
2L	11719534	11719535	0.8065
2L	11720307	11720308	0.7419
2L	11720308	11720309	0.7436
2L	11738566	11738567	0.7241
2L	11742427	11742428	0.84
2L	11742679	11742680	0.7143
2L	11747114	11747115	0.8723
2L	11747116	11747117	0.8222
2L	11747198	11747199	0.7838
2L	11750860	11750861	0.8065
2L	11750915	11750916	0.8049
2L	11753861	11753862	0.7436
2L	11755511	11755512	0.7143
2L	11759213	11759214	0.7778
2L	11759381	11759382	0.8378
2L	11760697	11760698	0.7143
2L	11768155	11768156	0.8974
2L	11768733	11768734	0.8788
2L	11768744	11768745	0.7419
2L	11768777	11768778	0.7576
2L	11784925	11784926	0.7391
2L	11788047	11788048	0.76
2L	11800432	11800433	0.8182
2L	11836084	11836085	0.9298
2L	11847475	11847476	0.7209
2L	11851873	11851874	0.7576
2L	11872082	11872083	0.8182
2L	11872879	11872880	0.8113
2L	11878862	11878863	0.7297
2L	11897245	11897246	0.9184
2L	11897846	11897847	0.7714
2L	11898687	11898688	0.8378
2L	11900558	11900559	0.7143
2L	11923426	11923427	0.8049
2L	11961284	11961285	0.8462
2L	11961285	11961286	0.7838
2L	11961288	11961289	0.8065
2L	11961912	11961913	0.7778
2L	11961913	11961914	0.7931
2L	11965710	11965711	0.7436
2L	11965944	11965945	0.7037
2L	11966612	11966613	0.76
2L	11973697	11973698	0.7419
2L	11981580	11981581	0.7297
2L	11986739	11986740	0.8095
2L	11997665	11997666	0.7551
2L	12007941	12007942	0.8776
2L	12008246	12008247	0.8286
2L	12008338	12008339	0.8974
2L	12008824	12008825	0.7436
2L	12022074	12022075	0.8537
2L	12024524	12024525	0.7297
2L	12028964	12028965	0.8298
2L	12035585	12035586	0.7297
2L	12038497	12038498	0.7241
2L	12051805	12051806	0.7391
2L	12078686	12078687	0.7419
2L	12098370	12098371	0.8621
2L	12108875	12108876	0.7073
2L	12109569	12109570	0.8378
2L	12110478	12110479	0.7949
2L	12110479	12110480	0.871
2L	12118908	12118909	0.871
2L	12122863	12122864	0.8788
2L	12122907	12122908	0.7931
2L	12123084	12123085	0.8519
2L	12143549	12143550	0.7143
2L	12166180	12166181	0.7895
2L	12166229	12166230	0.7714
2L	12192898	12192899	0.8519
2L	12192989	12192990	0.8378
2L	12193090	12193091	0.8919
2L	12197968	12197969	0.8049
2L	12201708	12201709	0.8788
2L	12201761	12201762	0.7714
2L	12208584	12208585	0.7143
2L	12240394	12240395	0.76
2L	12243692	12243693	0.7647
2L	12243708	12243709	0.7838
2L	12243710	12243711	0.7436
2L	12252285	12252286	0.7931
2L	12269679	12269680	0.8983
2L	12269748	12269749	0.8222
2L	12273188	12273189	0.7021
2L	12274479	12274480	0.7949
2L	12287930	12287931	0.8261
2L	12289103	12289104	0.7297
2L	12294193	12294194	0.7872
2L	12305609	12305610	0.7561
2L	12305670	12305671	0.7209
2L	12312127	12312128	0.8182
2L	12314081	12314082	0.7143
2L	12322585	12322586	0.7647
2L	12322586	12322587	0.7143
2L	12322990	12322991	0.9024
2L	12322994	12322995	0.8095
2L	12323013	12323014	0.907
2L	12323112	12323113	0.8286
2L	12328514	12328515	0.7838
2L	12328515	12328516	0.871
2L	12329791	12329792	0.8065
2L	12330287	12330288	0.8065
2L	12330288	12330289	0.7419
2L	12340380	12340381	0.7714
2L	12344687	12344688	0.7436
2L	12350346	12350347	0.7931
2L	12377639	12377640	0.8621
2L	12405740	12405741	0.8095
2L	12418926	12418927	0.8065
2L	12418929	12418930	0.7143
2L	12420226	12420227	0.7561
2L	12438966	12438967	0.8049
2L	12454502	12454503	0.8039
2L	12462389	12462390	0.8182
2L	12463040	12463041	0.8305
2L	12463041	12463042	0.8983
2L	12463042	12463043	0.8545
2L	12465458	12465459	0.8298
2L	12465957	12465958	0.7021
2L	12488325	12488326	0.7561
2L	12491318	12491319	0.7391
2L	12491320	12491321	0.7838
2L	12493544	12493545	0.7037
2L	12494926	12494927	0.8378
2L	12502514	12502515	0.7091
2L	12518500	12518501	0.7143
2L	12519197	12519198	0.8065
2L	12522100	12522101	0.8462
2L	12529396	12529397	0.7391
2L	12550661	12550662	0.7073
2L	12574141	12574142	0.8788
2L	12574968	12574969	0.871
2L	12575676	12575677	0.8095
2L	12575677	12575678	0.8095
2L	12575738	12575739	0.7037
2L	12578700	12578701	0.7576
2L	12578721	12578722	0.7838
2L	12581511	12581512	0.8065
2L	12581513	12581514	0.8286
2L	12585486	12585487	0.8049
2L	12638882	12638883	0.8857
2L	12642554	12642555	0.7576
2L	12643426	12643427	0.7931
2L	12675035	12675036	0.7037
2L	12704553	12704554	0.7037
2L	12707727	12707728	0.7778
2L	12715468	12715469	0.8261
2L	12722811	12722812	0.7931
2L	12738851	12738852	0.7037
2L	12744105	12744106	0.7241
2L	12749670	12749671	0.7391
2L	12764222	12764223	0.8286
2L	12765220	12765221	0.7037
2L	12790522	12790523	0.9149
2L	12795260	12795261	0.7143
2L	12829061	12829062	0.84
2L	12833947	12833948	0.8261
2L	12834206	12834207	0.8919
2L	12834229	12834230	0.7241
2L	12844271	12844272	0.7949
2L	12844272	12844273	0.7436
2L	12852554	12852555	0.76
2L	12858322	12858323	0.8537
2L	12861695	12861696	0.871
2L	12877717	12877718	0.8974
2L	12877718	12877719	0.8431
2L	12877720	12877721	0.9184
2L	12886374	12886375	0.7436
2L	12903447	12903448	0.7674
2L	12903494	12903495	0.9111
2L	12906668	12906669	0.907
2L	12913668	12913669	0.7037
2L	12915824	12915825	0.7551
2L	12925876	12925877	0.8261
2L	12926850	12926851	0.8261
2L	12930188	12930189	0.8788
2L	12930822	12930823	0.7838
2L	12933736	12933737	0.7143
2L	12937150	12937151	0.7391
2L	12937246	12937247	0.84
2L	12937247	12937248	0.8095
2L	12945233	12945234	0.7436
2L	12948699	12948700	0.8049
2L	12951409	12951410	0.9149
2L	12953023	12953024	0.8298
2L	12953035	12953036	0.8462
2L	12960897	12960898	0.8919
2L	12963516	12963517	0.7778
2L	12967433	12967434	0.7391
2L	12983759	12983760	0.76
2L	12993173	12993174	0.7037
2L	12999451	12999452	0.7931
2L	13000900	13000901	0.8919
2L	13013897	13013898	0.7838
2L	13050892	13050893	0.7143
2L	13067067	13067068	0.8286
2L	13067876	13067877	0.8947
2L	13099318	13099319	0.7143
2L	13099319	13099320	0.7778
2L	13101234	13101235	0.8788
2L	13128974	13128975	0.746
2L	13138676	13138677	0.7561
2L	13142305	13142306	0.7576
2L	13142306	13142307	0.8378
2L	13142335	13142336	0.8378
2L	13153169	13153170	0.8182
2L	13186450	13186451	0.7419
2L	13187207	13187208	0.8621
2L	13213774	13213775	0.8919
2L	13322259	13322260	0.8857
2L	13325110	13325111	0.76
2L	13346471	13346472	0.7778
2L	13347975	13347976	0.8065
2L	13348052	13348053	0.8919
2L	13360427	13360428	0.7037
2L	13363958	13363959	0.9111
2L	13366158	13366159	0.8462
2L	13366812	13366813	0.8049
2L	13367160	13367161	0.8095
2L	13368839	13368840	0.8537
2L	13368840	13368841	0.8857
2L	13371649	13371650	0.8182
2L	13374979	13374980	0.7561
2L	13375985	13375986	0.7297
2L	13382492	13382493	0.7419
2L	13408861	13408862	0.7576
2L	13416181	13416182	0.8065
2L	13428151	13428152	0.7143
2L	13443505	13443506	0.8378
2L	13443905	13443906	0.9024
2L	13443956	13443957	0.8519
2L	13444141	13444142	0.8462
2L	13444165	13444166	0.7714
2L	13444283	13444284	0.814
2L	13444618	13444619	0.8049
2L	13444619	13444620	0.7714
2L	13445926	13445927	0.7561
2L	13445953	13445954	0.8049
2L	13451654	13451655	0.7674
2L	13451655	13451656	0.8462
2L	13452167	13452168	0.7297
2L	13452352	13452353	0.7838
2L	13457069	13457070	0.7143
2L	13458483	13458484	0.7674
2L	13475868	13475869	0.76
2L	13490781	13490782	0.7021
2L	13504398	13504399	0.7838
2L	13504491	13504492	0.8378
2L	13533270	13533271	0.7021
2L	13533272	13533273	0.8049
2L	13535063	13535064	0.8065
2L	13536268	13536269	0.8723
2L	13538354	13538355	0.7391
2L	13541234	13541235	0.9111
2L	13634842	13634843	0.7241
2L	13646956	13646957	0.7838
2L	13657942	13657943	0.7143
2L	13672505	13672506	0.8065
2L	13682895	13682896	0.9273
2L	13696034	13696035	0.7297
2L	13696747	13696748	0.76
2L	13696834	13696835	0.8974
2L	13698642	13698643	0.8378
2L	13698680	13698681	0.8182
2L	13703299	13703300	0.7931
2L	13710195	13710196	0.8788
2L	13719099	13719100	0.907
2L	13719395	13719396	0.8788
2L	13720812	13720813	0.9024
2L	13720948	13720949	0.8462
2L	13723875	13723876	0.8605
2L	13733356	13733357	0.7931
2L	13735118	13735119	0.7931
2L	13735392	13735393	0.8378
2L	13743027	13743028	0.7143
2L	13743029	13743030	0.7037
2L	13746925	13746926	0.7838
2L	13750638	13750639	0.8286
2L	13751801	13751802	0.7391
2L	13751850	13751851	0.7037
2L	13753440	13753441	0.8919
2L	13753643	13753644	0.7419
2L	13786810	13786811	0.76
2L	13792980	13792981	0.7419
2L	13806816	13806817	0.7872
2L	13828792	13828793	0.7436
2L	13830663	13830664	0.7391
2L	13830664	13830665	0.7241
2L	13832689	13832690	0.8857
2L	13838141	13838142	0.8788
2L	13845875	13845876	0.7949
2L	13855030	13855031	0.7391
2L	13859861	13859862	0.8049
2L	13860190	13860191	0.7714
2L	13873113	13873114	0.7037
2L	13873245	13873246	0.7037
2L	13879924	13879925	0.7436
2L	13905292	13905293	0.7297
2L	13905724	13905725	0.9216
2L	13965985	13965986	0.8519
2L	13965997	13965998	0.8788
2L	13978061	13978062	0.7647
2L	13979601	13979602	0.7391
2L	13984951	13984952	0.8857
2L	14005519	14005520	0.7931
2L	14031863	14031864	0.7333
2L	14031864	14031865	0.7959
2L	14061003	14061004	0.7949
2L	14065384	14065385	0.7576
2L	14097024	14097025	0.9111
2L	14097654	14097655	0.7143
2L	14100600	14100601	0.7297
2L	14113277	14113278	0.7333
2L	14121787	14121788	0.8974
2L	14123425	14123426	0.8621
2L	14124124	14124125	0.8519
2L	14124237	14124238	0.9024
2L	14124895	14124896	0.871
2L	14125488	14125489	0.7143
2L	14125988	14125989	0.7931
2L	14131159	14131160	0.7037
2L	14132198	14132199	0.7576
2L	14134451	14134452	0.7949
2L	14136892	14136893	0.8788
2L	14140938	14140939	0.7838
2L	14142093	14142094	0.7333
2L	14143002	14143003	0.8065
2L	14159654	14159655	0.8857
2L	14159655	14159656	0.8788
2L	14169650	14169651	0.7391
2L	14169681	14169682	0.76
2L	14170458	14170459	0.76
2L	14170459	14170460	0.7647
2L	14172126	14172127	0.7419
2L	14172994	14172995	0.84
2L	14185370	14185371	0.7241
2L	14193067	14193068	0.7895
2L	14193644	14193645	0.76
2L	14199134	14199135	0.8065
2L	14205572	14205573	0.8065
2L	14207069	14207070	0.8857
2L	14207070	14207071	0.8919
2L	14207071	14207072	0.8286
2L	14207072	14207073	0.8788
2L	14226315	14226316	0.7255
2L	14226316	14226317	0.8491
2L	14226317	14226318	0.7143
2L	14228236	14228237	0.8033
2L	14228994	14228995	0.7551
2L	14229693	14229694	0.7674
2L	14233737	14233738	0.8378
2L	14237531	14237532	0.8621
2L	14237622	14237623	0.8095
2L	14237661	14237662	0.8261
2L	14248692	14248693	0.7073
2L	14269054	14269055	0.7037
2L	14269862	14269863	0.8065
2L	14277070	14277071	0.7778
2L	14277071	14277072	0.8621
2L	14297695	14297696	0.76
2L	14316873	14316874	0.7241
2L	14336312	14336313	0.7143
2L	14339631	14339632	0.8095
2L	14339707	14339708	0.8621
2L	14339846	14339847	0.7241
2L	14345699	14345700	0.7037
2L	14346435	14346436	0.76
2L	14353569	14353570	0.7391
2L	14353570	14353571	0.8261
2L	14353571	14353572	0.7576
2L	14357660	14357661	0.7073
2L	14404936	14404937	0.7073
2L	14413191	14413192	0.7037
2L	14423974	14423975	0.9111
2L	14427111	14427112	0.7949
2L	14428411	14428412	0.8621
2L	14433151	14433152	0.76
2L	14445377	14445378	0.907
2L	14445391	14445392	0.7037
2L	14447521	14447522	0.7436
2L	14447523	14447524	0.8919
2L	14447524	14447525	0.8974
2L	14447525	14447526	0.7949
2L	14447526	14447527	0.7073
2L	14448108	14448109	0.7714
2L	14456012	14456013	0.9149
2L	14456052	14456053	0.8049
2L	14464317	14464318	0.8462
2L	14469734	14469735	0.8788
2L	14481637	14481638	0.7037
2L	14482595	14482596	0.8431
2L	14485669	14485670	0.8286
2L	14487979	14487980	0.8049
2L	14492129	14492130	0.76
2L	14494336	14494337	0.8462
2L	14499113	14499114	0.8462
2L	14504605	14504606	0.7931
2L	14513914	14513915	0.7143
2L	14514220	14514221	0.8519
2L	14517458	14517459	0.7297
2L	14517685	14517686	0.7674
2L	14520682	14520683	0.7561
2L	14528423	14528424	0.7419
2L	14534729	14534730	0.8431
2L	14542983	14542984	0.8286
2L	14561256	14561257	0.7297
2L	14561612	14561613	0.8065
2L	14561613	14561614	0.7674
2L	14561615	14561616	0.7949
2L	14562234	14562235	0.8621
2L	14568351	14568352	0.7143
2L	14572887	14572888	0.7778
2L	14632149	14632150	0.7576
2L	14642935	14642936	0.8621
2L	14642936	14642937	0.8788
2L	14682121	14682122	0.8095
2L	14755469	14755470	0.7241
2L	14773211	14773212	0.7838
2L	14782930	14782931	0.7037
2L	14797852	14797853	0.7241
2L	14807095	14807096	0.7297
2L	14807797	14807798	0.7561
2L	14811956	14811957	0.7037
2L	14834396	14834397	0.8537
2L	14834397	14834398	0.8723
2L	14834412	14834413	0.8222
2L	14835825	14835826	0.7872
2L	14845322	14845323	0.7021
2L	14866196	14866197	0.7714
2L	14883388	14883389	0.7436
2L	14890962	14890963	0.7895
2L	14916733	14916734	0.8378
2L	14955790	14955791	0.8261
2L	14960481	14960482	0.7037
2L	14973830	14973831	0.7959
2L	14990592	14990593	0.8378
2L	14993352	14993353	0.8974
2L	14993353	14993354	0.7436
2L	14994638	14994639	0.7576
2L	14994639	14994640	0.871
2L	15002284	15002285	0.7778
2L	15006958	15006959	0.7895
2L	15007484	15007485	0.76
2L	15020728	15020729	0.7143
2L	15021948	15021949	0.7143
2L	15026995	15026996	0.871
2L	15037084	15037085	0.8519
2L	15037086	15037087	0.8065
2L	15080834	15080835	0.8605
2L	15092236	15092237	0.7037
2L	15097962	15097963	0.7419
2L	15111671	15111672	0.8537
2L	15128856	15128857	0.7576
2L	15128857	15128858	0.814
2L	15144869	15144870	0.7931
2L	15179243	15179244	0.7143
2L	15179253	15179254	0.871
2L	15179258	15179259	0.8621
2L	15179362	15179363	0.7073
2L	15203304	15203305	0.7419
2L	15203305	15203306	0.7714
2L	15214799	15214800	0.7647
2L	15234180	15234181	0.8596
2L	15261855	15261856	0.8519
2L	15261856	15261857	0.7241
2L	15266086	15266087	0.76
2L	15272409	15272410	0.7143
2L	15278828	15278829	0.7143
2L	15285462	15285463	0.8261
2L	15288221	15288222	0.7037
2L	15293296	15293297	0.7931
2L	15309749	15309750	0.7647
2L	15322774	15322775	0.7949
2L	15325468	15325469	0.7143
2L	15325952	15325953	0.9111
2L	15347026	15347027	0.7576
2L	15355212	15355213	0.8919
2L	15384134	15384135	0.8519
2L	15396359	15396360	0.7778
2L	15411868	15411869	0.7436
2L	15414326	15414327	0.8667
2L	15430593	15430594	0.7143
2L	15448140	15448141	0.9111
2L	15506217	15506218	0.8298
2L	15507345	15507346	0.7143
2L	15510111	15510112	0.7021
2L	15510115	15510116	0.7209
2L	15510144	15510145	0.7333
2L	15513738	15513739	0.8286
2L	15513740	15513741	0.9184
2L	15539026	15539027	0.9111
2L	15539460	15539461	0.7143
2L	15539854	15539855	0.8537
2L	15543613	15543614	0.7447
2L	15547971	15547972	0.7576
2L	15549772	15549773	0.7627
2L	15551082	15551083	0.7949
2L	15551083	15551084	0.7714
2L	15552386	15552387	0.871
2L	15566982	15566983	0.814
2L	15566983	15566984	0.8462
2L	15592058	15592059	0.7838
2L	15595587	15595588	0.7333
2L	15595588	15595589	0.907
2L	15602433	15602434	0.8039
2L	15602435	15602436	0.9111
2L	15603161	15603162	0.8857
2L	15603162	15603163	0.7419
2L	15622087	15622088	0.8065
2L	15622132	15622133	0.7419
2L	15624746	15624747	0.7297
2L	15633942	15633943	0.7241
2L	15634239	15634240	0.8519
2L	15634288	15634289	0.8621
2L	15634289	15634290	0.8519
2L	15634291	15634292	0.84
2L	15645757	15645758	0.7576
2L	15647443	15647444	0.7391
2L	15651697	15651698	0.7778
2L	15671737	15671738	0.8868
2L	15673311	15673312	0.7143
2L	15692107	15692108	0.7674
2L	15694777	15694778	0.76
2L	15710996	15710997	0.8857
2L	15710998	15710999	0.7209
2L	15723338	15723339	0.8919
2L	15764033	15764034	0.8065
2L	15772448	15772449	0.7241
2L	15776056	15776057	0.7037
2L	15776057	15776058	0.7037
2L	15791563	15791564	0.7436
2L	15820061	15820062	0.7391
2L	15847724	15847725	0.7143
2L	15847789	15847790	0.84
2L	15849292	15849293	0.7391
2L	15853846	15853847	0.8261
2L	15871730	15871731	0.8261
2L	15895269	15895270	0.8095
2L	15906172	15906173	0.871
2L	15906825	15906826	0.7576
2L	15908119	15908120	0.871
2L	15919881	15919882	0.7895
2L	15922622	15922623	0.8462
2L	15922623	15922624	0.8286
2L	15943830	15943831	0.7576
2L	15951476	15951477	0.8462
2L	15973935	15973936	0.9216
2L	15983457	15983458	0.9216
2L	15983460	15983461	0.8868
2L	15983575	15983576	0.7143
2L	15984005	15984006	0.8788
2L	15984155	15984156	0.7073
2L	15984180	15984181	0.7674
2L	15986695	15986696	0.7297
2L	15998652	15998653	0.8857
2L	15999335	15999336	0.9024
2L	16008167	16008168	0.7049
2L	16009072	16009073	0.9077
2L	16023095	16023096	0.8065
2L	16027853	16027854	0.7241
2L	16034336	16034337	0.8286
2L	16047549	16047550	0.7073
2L	16047550	16047551	0.7209
2L	16047551	16047552	0.7297
2L	16067737	16067738	0.8065
2L	16068370	16068371	0.7931
2L	16068800	16068801	0.7143
2L	16073391	16073392	0.8974
2L	16073522	16073523	0.7931
2L	16077600	16077601	0.7714
2L	16077602	16077603	0.7241
2L	16079489	16079490	0.8049
2L	16088832	16088833	0.9216
2L	16090422	16090423	0.8462
2L	16103831	16103832	0.7241
2L	16105205	16105206	0.8065
2L	16107334	16107335	0.7778
2L	16108049	16108050	0.8788
2L	16110801	16110802	0.8286
2L	16110922	16110923	0.8621
2L	16111237	16111238	0.7895
2L	16111288	16111289	0.7143
2L	16111337	16111338	0.7037
2L	16112688	16112689	0.8065
2L	16115372	16115373	0.7419
2L	16115457	16115458	0.7436
2L	16119642	16119643	0.7714
2L	16122128	16122129	0.8605
2L	16127870	16127871	0.7561
2L	16140666	16140667	0.8286
2L	16145247	16145248	0.7778
2L	16187069	16187070	0.7561
2L	16187070	16187071	0.8378
2L	16187162	16187163	0.8049
2L	16188773	16188774	0.871
2L	16191863	16191864	0.7419
2L	16197051	16197052	0.7778
2L	16197052	16197053	0.7037
2L	16201661	16201662	0.7436
2L	16215010	16215011	0.8378
2L	16217848	16217849	0.7561
2L	16244729	16244730	0.9111
2L	16245172	16245173	0.7143
2L	16245173	16245174	0.7647
2L	16249686	16249687	0.7838
2L	16260803	16260804	0.9024
2L	16314040	16314041	0.8261
2L	16314638	16314639	0.8095
2L	16334020	16334021	0.8723
2L	16335260	16335261	0.7037
2L	16342721	16342722	0.7714
2L	16344015	16344016	0.76
2L	16345848	16345849	0.7419
2L	16347955	16347956	0.7931
2L	16360034	16360035	0.7778
2L	16360035	16360036	0.871
2L	16372655	16372656	0.7241
2L	16381035	16381036	0.7576
2L	16381047	16381048	0.7037
2L	16391850	16391851	0.8519
2L	16402858	16402859	0.7895
2L	16419917	16419918	0.7143
2L	16420795	16420796	0.7143
2L	16428263	16428264	0.7333
2L	16438048	16438049	0.8182
2L	16438049	16438050	0.8182
2L	16455302	16455303	0.76
2L	16458611	16458612	0.907
2L	16458613	16458614	0.8974
2L	16475432	16475433	0.7949
2L	16475455	16475456	0.7021
2L	16479344	16479345	0.7333
2L	16516132	16516133	0.8788
2L	16523229	16523230	0.76
2L	16530052	16530053	0.8919
2L	16534420	16534421	0.7241
2L	16561913	16561914	0.7073
2L	16564126	16564127	0.7143
2L	16565152	16565153	0.7778
2L	16576898	16576899	0.84
2L	16576899	16576900	0.8519
2L	16594690	16594691	0.76
2L	16595777	16595778	0.8621
2L	16603764	16603765	0.7895
2L	16605076	16605077	0.7872
2L	16606584	16606585	0.8519
2L	16610696	16610697	0.7241
2L	16611200	16611201	0.8065
2L	16614927	16614928	0.8261
2L	16620480	16620481	0.7037
2L	16624886	16624887	0.84
2L	16624888	16624889	0.7647
2L	16628096	16628097	0.7297
2L	16628105	16628106	0.76
2L	16628262	16628263	0.7714
2L	16647724	16647725	0.8286
2L	16666246	16666247	0.8261
2L	16757425	16757426	0.7931
2L	16757778	16757779	0.7931
2L	16757779	16757780	0.7931
2L	16758426	16758427	0.7778
2L	16758429	16758430	0.871
2L	16771495	16771496	0.7391
2L	16779950	16779951	0.8621
2L	16783765	16783766	0.8462
2L	16783766	16783767	0.8286
2L	16783767	16783768	0.8182
2L	16786013	16786014	0.7391
2L	16786252	16786253	0.8095
2L	16787195	16787196	0.8378
2L	16787917	16787918	0.7241
2L	16795996	16795997	0.7037
2L	16823449	16823450	0.8182
2L	16903174	16903175	0.8095
2L	16910111	16910112	0.7333
2L	16923577	16923578	0.8261
2L	16924953	16924954	0.7778
2L	16936114	16936115	0.7838
2L	16942080	16942081	0.8788
2L	16951103	16951104	0.8095
2L	16966234	16966235	0.7143
2L	16968735	16968736	0.7419
2L	16975198	16975199	0.7714
2L	16975199	16975200	0.8065
2L	16979791	16979792	0.76
2L	17001719	17001720	0.7895
2L	17013570	17013571	0.8519
2L	17016810	17016811	0.7778
2L	17017626	17017627	0.8788
2L	17035566	17035567	0.7714
2L	17042146	17042147	0.9111
2L	17060054	17060055	0.76
2L	17064060	17064061	0.8065
2L	17082011	17082012	0.8776
2L	17087981	17087982	0.8065
2L	17093261	17093262	0.7419
2L	17100508	17100509	0.7949
2L	17103991	17103992	0.7778
2L	17110946	17110947	0.8286
2L	17125614	17125615	0.7021
2L	17125615	17125616	0.7447
2L	17139385	17139386	0.7143
2L	17142964	17142965	0.7949
2L	17145450	17145451	0.7674
2L	17154899	17154900	0.871
2L	17163549	17163550	0.7391
2L	17163814	17163815	0.7143
2L	17163815	17163816	0.8095
2L	17170380	17170381	0.7391
2L	17170929	17170930	0.7818
2L	17181858	17181859	0.8621
2L	17217298	17217299	0.8065
2L	17239297	17239298	0.8605
2L	17244700	17244701	0.8537
2L	17244701	17244702	0.9111
2L	17251589	17251590	0.7674
2L	17254141	17254142	0.7714
2L	17270407	17270408	0.7209
2L	17290013	17290014	0.7333
2L	17294661	17294662	0.7241
2L	17296500	17296501	0.8519
2L	17299782	17299783	0.7209
2L	17300122	17300123	0.7561
2L	17300125	17300126	0.7209
2L	17305401	17305402	0.7419
2L	17305410	17305411	0.7143
2L	17307896	17307897	0.8261
2L	17316454	17316455	0.7674
2L	17332095	17332096	0.7297
2L	17336062	17336063	0.7143
2L	17345169	17345170	0.7143
2L	17372582	17372583	0.8065
2L	17398292	17398293	0.7037
2L	17438061	17438062	0.8065
2L	17459095	17459096	0.7895
2L	17472099	17472100	0.76
2L	17490563	17490564	0.8261
2L	17490564	17490565	0.871
2L	17517527	17517528	0.8261
2L	17527361	17527362	0.7895
2L	17577813	17577814	0.7143
2L	17591582	17591583	0.7576
2L	17591583	17591584	0.7241
2L	17628821	17628822	0.8065
2L	17628823	17628824	0.7037
2L	17632631	17632632	0.8378
2L	17639688	17639689	0.8261
2L	17727534	17727535	0.7838
2L	17738436	17738437	0.8621
2L	17764663	17764664	0.7143
2L	17769426	17769427	0.7297
2L	17782654	17782655	0.7714
[truncated: 8,468 more rows]

## Sheet: 6mA positions iso-1
Chr	Start	End	Flybase Features	Gene ID's
2L	67887	67888	intron,mRNA	FBgn0067779
2L	121644	121645	exon,five_prime_UTR,intron,mRNA	FBgn0031220,FBgn0031228
2L	150183	150184	intron,mRNA	FBgn0259818,FBgn0031228
2L	172314	172315	intron,mRNA	FBgn0016977
2L	172315	172316	intron,mRNA	FBgn0016977
2L	212466	212467	CDS,exon,mRNA	FBgn0266557
2L	223731	223732	exon,intron,mRNA	FBgn0265153,FBgn0266557
2L	235415	235416	CDS,exon,mRNA	FBgn0266557
2L	259065	259066	intron,mRNA	FBgn0031238
2L	267002	267003	exon,five_prime_UTR,intron,mRNA	FBgn0031238,FBgn0031239
2L	271636	271637	exon,five_prime_UTR,mRNA	FBgn0031238
2L	314423	314424	intron,mRNA	FBgn0004611
2L	316773	316774	intron,mRNA	FBgn0004611
2L	316774	316775	intron,mRNA	FBgn0004611
2L	318414	318415	exon,intron,mRNA,three_prime_UTR	FBgn0031248,FBgn0004611
2L	391228	391229	intergenic	.
2L	413134	413135	intron,mRNA	FBgn0264855
2L	425927	425928	intergenic	.
2L	432451	432452	intron,mRNA	FBgn0004583
2L	487634	487635	intron,mRNA	FBgn0003963
2L	510704	510705	intron,mRNA	FBgn0003963
2L	522873	522874	intron,mRNA	FBgn0003963
2L	532224	532225	intron,mRNA	FBgn0003963
2L	605081	605082	intergenic	.
2L	637067	637068	intergenic	.
2L	639919	639920	intergenic	.
2L	639928	639929	intergenic	.
2L	651279	651280	intron,mRNA	FBgn0284247
2L	655891	655892	intron,mRNA	FBgn0284247
2L	665465	665466	intron,mRNA	FBgn0284247
2L	665466	665467	intron,mRNA	FBgn0284247
2L	665569	665570	intron,mRNA	FBgn0284247
2L	666861	666862	intron,mRNA	FBgn0284247
2L	678485	678486	intron,mRNA	FBgn0284247
2L	700455	700456	intron,mRNA	FBgn0284247
2L	703545	703546	intron,mRNA	FBgn0284247
2L	703546	703547	intron,mRNA	FBgn0284247
2L	704858	704859	intron,mRNA	FBgn0284247
2L	720283	720284	intergenic	.
2L	720493	720494	intergenic	.
2L	731219	731220	intergenic	.
2L	731220	731221	intergenic	.
2L	733367	733368	intergenic	.
2L	744060	744061	intron,mRNA	FBgn0026438
2L	747304	747305	intergenic	.
2L	749674	749675	upstream	.
2L	749675	749676	upstream	.
2L	749727	749728	upstream	.
2L	749756	749757	upstream	.
2L	763476	763477	intergenic	.
2L	765316	765317	intergenic	.
2L	805074	805075	intergenic	.
2L	880938	880939	intron,mRNA	FBgn0031292
2L	883335	883336	intron,mRNA	FBgn0031292
2L	888566	888567	intergenic	.
2L	892288	892289	intergenic	.
2L	914793	914794	intron,mRNA	FBgn0046113
2L	934163	934164	intron,mRNA	FBgn0028481
2L	936684	936685	intron,mRNA	FBgn0028481
2L	948945	948946	intron,mRNA	FBgn0028481
2L	1021779	1021780	intron,mRNA	FBgn0031294
2L	1023545	1023546	intron,mRNA	FBgn0031294
2L	1026445	1026446	CDS,exon,intron,mRNA	FBgn0031295,FBgn0031294
2L	1078425	1078426	CDS,exon,mRNA	FBgn0015905
2L	1099266	1099267	intron,mRNA	FBgn0031299
2L	1111538	1111539	CDS,exon,mRNA	FBgn0031301
2L	1180169	1180170	exon,intron,mRNA,three_prime_UTR	FBgn0031319
2L	1190774	1190775	intron,mRNA	FBgn0031322
2L	1190775	1190776	intron,mRNA	FBgn0031322
2L	1195108	1195109	intron,mRNA	FBgn0031322
2L	1195110	1195111	intron,mRNA	FBgn0031322
2L	1195699	1195700	intron,mRNA	FBgn0031322
2L	1207478	1207479	intergenic	.
2L	1209307	1209308	intergenic	.
2L	1210954	1210955	intergenic	.
2L	1218757	1218758	intergenic	.
2L	1236855	1236856	intergenic	.
2L	1257178	1257179	intron,mRNA	FBgn0041097
2L	1260542	1260543	intron,mRNA	FBgn0041097
2L	1273439	1273440	intron,mRNA	FBgn0041097
2L	1276170	1276171	intron,mRNA	FBgn0041097
2L	1276354	1276355	intron,mRNA	FBgn0041097
2L	1277241	1277242	intron,mRNA	FBgn0041097
2L	1281565	1281566	intron,mRNA	FBgn0041097
2L	1281566	1281567	intron,mRNA	FBgn0041097
2L	1281567	1281568	intron,mRNA	FBgn0041097
2L	1281735	1281736	intron,mRNA	FBgn0041097
2L	1282036	1282037	intron,mRNA	FBgn0041097
2L	1282037	1282038	intron,mRNA	FBgn0041097
2L	1283617	1283618	intron,mRNA	FBgn0041097
2L	1309487	1309488	intergenic	.
2L	1309488	1309489	intergenic	.
2L	1310477	1310478	TE,intergenic	.
2L	1325462	1325463	intergenic	.
2L	1356589	1356590	intergenic	.
2L	1357210	1357211	intergenic	.
2L	1357262	1357263	intergenic	.
2L	1357359	1357360	intergenic	.
2L	1361122	1361123	intron,mRNA	FBgn0053126
2L	1361123	1361124	intron,mRNA	FBgn0053126
2L	1378539	1378540	intergenic	.
2L	1394842	1394843	intron,mRNA	FBgn0002543
2L	1403546	1403547	intron,mRNA	FBgn0002543
2L	1406459	1406460	intron,mRNA	FBgn0002543
2L	1408703	1408704	intron,mRNA	FBgn0002543
2L	1409439	1409440	intron,mRNA	FBgn0002543
2L	1411088	1411089	intron,mRNA	FBgn0002543
2L	1447542	1447543	intergenic	.
2L	1465608	1465609	intergenic	.
2L	1465610	1465611	intergenic	.
2L	1466340	1466341	intergenic	.
2L	1483477	1483478	intergenic	.
2L	1484822	1484823	intergenic	.
2L	1491856	1491857	upstream	.
2L	1514418	1514419	intergenic	.
2L	1519337	1519338	intergenic	.
2L	1534686	1534687	intergenic	.
2L	1564857	1564858	intron,mRNA	FBgn0261509
2L	1568808	1568809	intron,mRNA	FBgn0261509
2L	1569887	1569888	intron,mRNA	FBgn0261509
2L	1579712	1579713	intron,mRNA	FBgn0261509
2L	1581685	1581686	intron,mRNA	FBgn0261509
2L	1585017	1585018	CDS,exon,intron,mRNA	FBgn0031347,FBgn0261509
2L	1590388	1590389	intron,mRNA	FBgn0261509
2L	1622139	1622140	exon	FBgn0265814
2L	1623044	1623045	exon	FBgn0265814
2L	1626827	1626828	intergenic	.
2L	1630886	1630887	intergenic	.
2L	1638242	1638243	intergenic	.
2L	1638755	1638756	intergenic	.
2L	1638756	1638757	intergenic	.
2L	1647628	1647629	upstream	.
2L	1649333	1649334	intergenic	.
2L	1650196	1650197	intergenic	.
2L	1651067	1651068	upstream	.
2L	1656175	1656176	intron,mRNA	FBgn0086758
2L	1656176	1656177	intron,mRNA	FBgn0086758
2L	1666368	1666369	intron,mRNA	FBgn0086758
2L	1668452	1668453	intron,mRNA	FBgn0086758
2L	1778141	1778142	intergenic	.
2L	1791614	1791615	CDS,exon,mRNA	FBgn0265138
2L	1799520	1799521	intergenic	.
2L	1841762	1841763	intron,mRNA	FBgn0051665
2L	1842829	1842830	intron,mRNA	FBgn0051665
2L	1843251	1843252	CDS,exon,mRNA	FBgn0051665
2L	1850485	1850486	intron,mRNA	FBgn0051665
2L	1851011	1851012	intron,mRNA	FBgn0051665
2L	1852318	1852319	intron,mRNA	FBgn0051665
2L	1852801	1852802	intron,mRNA	FBgn0051665
2L	1871782	1871783	intron,mRNA	FBgn0051663
2L	1891985	1891986	intron,mRNA	FBgn0031374
2L	1902785	1902786	intron,mRNA	FBgn0031374
2L	1905153	1905154	intron,mRNA	FBgn0031374
2L	1932300	1932301	intron,mRNA	FBgn0031374
2L	1932301	1932302	intron,mRNA	FBgn0031374
2L	1933780	1933781	intron,mRNA	FBgn0031374
2L	1937606	1937607	intron,mRNA	FBgn0031374
2L	1938396	1938397	intron,mRNA	FBgn0031374
2L	1945279	1945280	exon,mRNA,three_prime_UTR	FBgn0040719
2L	1955462	1955463	intron,mRNA	FBgn0031375
2L	1955479	1955480	intron,mRNA	FBgn0031375
2L	1965511	1965512	TE,intron,mRNA	FBgn0031375
2L	1965512	1965513	TE,intron,mRNA	FBgn0031375
2L	2014288	2014289	intron,mRNA	FBgn0031384
2L	2017293	2017294	intron,mRNA	FBgn0031384
2L	2017905	2017906	intron,mRNA	FBgn0031384
2L	2079715	2079716	intron,mRNA	FBgn0053516
2L	2096923	2096924	intron,mRNA	FBgn0053516
2L	2111749	2111750	intergenic	.
2L	2113594	2113595	TE,intergenic	.
2L	2118982	2118983	TE,intergenic	.
2L	2118983	2118984	TE,intergenic	.
2L	2120683	2120684	intergenic	.
2L	2121095	2121096	intergenic	.
2L	2121422	2121423	intergenic	.
2L	2121423	2121424	intergenic	.
2L	2126535	2126536	intergenic	.
2L	2139024	2139025	intron,mRNA	FBgn0031390
2L	2139025	2139026	intron,mRNA	FBgn0031390
2L	2163776	2163777	intron,mRNA	FBgn0000097
2L	2163777	2163778	intron,mRNA	FBgn0000097
2L	2176763	2176764	intron,mRNA	FBgn0000097
2L	2176764	2176765	intron,mRNA	FBgn0000097
2L	2179576	2179577	intergenic	.
2L	2212927	2212928	exon,mRNA,three_prime_UTR	FBgn0010288
2L	2214614	2214615	CDS,exon,mRNA	FBgn0085203
2L	2215246	2215247	exon,mRNA,three_prime_UTR	FBgn0031398
2L	2216224	2216225	exon,mRNA	FBgn0031398
2L	2216308	2216309	exon,five_prime_UTR,mRNA	FBgn0031398
2L	2244848	2244849	exon,mRNA,three_prime_UTR	FBgn0264979
2L	2249715	2249716	intergenic	.
2L	2253948	2253949	intergenic	.
2L	2301938	2301939	intergenic	.
2L	2301983	2301984	intergenic	.
2L	2330086	2330087	intron,mRNA	FBgn0031413,FBgn0031414
2L	2330088	2330089	intron,mRNA	FBgn0031413,FBgn0031414
2L	2337417	2337418	intron,mRNA	FBgn0031413,FBgn0031414
2L	2402384	2402385	intron,mRNA	FBgn0031424
2L	2403061	2403062	intron,mRNA	FBgn0031424
2L	2403734	2403735	intron,mRNA	FBgn0031424
2L	2436821	2436822	intron,mRNA	FBgn0000490
2L	2446656	2446657	intron,mRNA	FBgn0000490
2L	2450488	2450489	intron,mRNA	FBgn0000490
2L	2465358	2465359	intergenic	.
2L	2485051	2485052	intergenic	.
2L	2501628	2501629	intergenic	.
2L	2510873	2510874	intergenic	.
2L	2514081	2514082	intergenic	.
2L	2526267	2526268	intergenic	.
2L	2531748	2531749	intergenic	.
2L	2545250	2545251	intergenic	.
2L	2545763	2545764	intergenic	.
2L	2553480	2553481	intergenic	.
2L	2561414	2561415	intergenic	.
2L	2561818	2561819	intergenic	.
2L	2563081	2563082	intron,mRNA	FBgn0031432
2L	2585677	2585678	upstream	.
2L	2588442	2588443	intergenic	.
2L	2588447	2588448	intergenic	.
2L	2588567	2588568	intergenic	.
2L	2589330	2589331	intergenic	.
2L	2619511	2619512	intergenic	.
2L	2634382	2634383	intergenic	.
2L	2647578	2647579	CDS,exon,mRNA	FBgn0031441
2L	2685493	2685494	TE,intron,mRNA	FBgn0051690
2L	2688494	2688495	intron,mRNA	FBgn0051690
2L	2690902	2690903	intron,mRNA	FBgn0051690
2L	2701522	2701523	intron,mRNA	FBgn0051690
2L	2705201	2705202	intron,mRNA	FBgn0051690
2L	2705205	2705206	intron,mRNA	FBgn0051690
2L	2707101	2707102	intron,mRNA	FBgn0051690
2L	2715750	2715751	intron,mRNA	FBgn0051690
2L	2723141	2723142	intergenic	.
2L	2724390	2724391	intergenic	.
2L	2729186	2729187	intron,mRNA	FBgn0031449
2L	2729187	2729188	intron,mRNA	FBgn0031449
2L	2731175	2731176	intron,mRNA	FBgn0031449
2L	2790184	2790185	intron,mRNA	FBgn0004242
2L	2794876	2794877	intron,mRNA	FBgn0004242
2L	2821514	2821515	intron,mRNA	FBgn0283531
2L	2822540	2822541	intron,mRNA	FBgn0283531
2L	2825788	2825789	intron,mRNA	FBgn0283531
2L	2827361	2827362	intron,mRNA	FBgn0283531
2L	2827362	2827363	intron,mRNA	FBgn0283531
2L	2828811	2828812	intron,mRNA	FBgn0283531
2L	2835444	2835445	CDS,exon,mRNA	FBgn0031466
2L	2836271	2836272	intron,mRNA	FBgn0031466
2L	2836272	2836273	intron,mRNA	FBgn0031466
2L	2836515	2836516	intron,mRNA	FBgn0031466
2L	2883080	2883081	exon,five_prime_UTR,intron,mRNA	FBgn0024947
2L	2930837	2930838	intron,mRNA	FBgn0041111
2L	2937418	2937419	intron,mRNA	FBgn0041111
2L	2944114	2944115	intron,mRNA	FBgn0041111
2L	2944115	2944116	intron,mRNA	FBgn0041111
2L	3048751	3048752	exon,intron,mRNA	FBgn0003934,FBgn0042627
2L	3048847	3048848	intron,mRNA	FBgn0042627
2L	3062515	3062516	CDS,exon,mRNA	FBgn0283427
2L	3064768	3064769	CDS,exon,mRNA	FBgn0283427
2L	3087989	3087990	intron,mRNA	FBgn0015600
2L	3088990	3088991	intron,mRNA	FBgn0015600
2L	3094099	3094100	intron,mRNA	FBgn0015600
2L	3095130	3095131	intron,mRNA	FBgn0015600
2L	3095607	3095608	intron,mRNA	FBgn0015600
2L	3099243	3099244	intron,mRNA	FBgn0015600
2L	3103274	3103275	intron,mRNA	FBgn0015600
2L	3113593	3113594	intron,mRNA	FBgn0015600
2L	3117419	3117420	intron,mRNA	FBgn0015600
2L	3141890	3141891	intron,mRNA	FBgn0015600
2L	3150150	3150151	intron,mRNA	FBgn0011648
2L	3166453	3166454	intron,mRNA	FBgn0014906
2L	3201634	3201635	intergenic	.
2L	3211060	3211061	exon	FBgn0266875
2L	3231839	3231840	intergenic	.
2L	3244729	3244730	intergenic	.
2L	3272447	3272448	intergenic	.
2L	3274382	3274383	intergenic	.
2L	3282203	3282204	intergenic	.
2L	3282878	3282879	intergenic	.
2L	3282879	3282880	intergenic	.
2L	3283471	3283472	intergenic	.
2L	3305796	3305797	intron,mRNA	FBgn0031518
2L	3307372	3307373	intron,mRNA	FBgn0031518
2L	3316508	3316509	intron,mRNA	FBgn0031518
2L	3316709	3316710	intron,mRNA	FBgn0031518
2L	3318954	3318955	intron,mRNA	FBgn0031519
2L	3318955	3318956	intron,mRNA	FBgn0031519
2L	3326508	3326509	CDS,exon,mRNA	FBgn0053281
2L	3327341	3327342	intergenic	.
2L	3327523	3327524	upstream	.
2L	3333752	3333753	CDS,exon,mRNA	FBgn0031523
2L	3333754	3333755	CDS,exon,mRNA	FBgn0031523
2L	3347698	3347699	intron,mRNA	FBgn0020445
2L	3383597	3383598	intergenic	.
2L	3387736	3387737	exon,five_prime_UTR,mRNA	FBgn0259949
2L	3388274	3388275	intron,mRNA	FBgn0259950
2L	3394832	3394833	intergenic	.
2L	3400392	3400393	intergenic	.
2L	3400393	3400394	intergenic	.
2L	3401193	3401194	intergenic	.
2L	3401227	3401228	intergenic	.
2L	3421278	3421279	intron,mRNA	FBgn0031530
2L	3422216	3422217	intron,mRNA	FBgn0031530
2L	3431319	3431320	intergenic	.
2L	3431320	3431321	intergenic	.
2L	3431321	3431322	intergenic	.
2L	3431418	3431419	intergenic	.
2L	3432562	3432563	intergenic	.
2L	3437097	3437098	intergenic	.
2L	3482873	3482874	intron,mRNA	FBgn0031542
2L	3483741	3483742	intron,mRNA	FBgn0031542
2L	3539061	3539062	upstream	.
2L	3539413	3539414	intron,mRNA	FBgn0024244
2L	3544899	3544900	intron,mRNA	FBgn0024244
2L	3559685	3559686	intergenic	.
2L	3560508	3560509	intergenic	.
2L	3563820	3563821	intergenic,upstream	.
2L	3564649	3564650	intergenic	.
2L	3591073	3591074	intergenic	.
2L	3591075	3591076	intergenic	.
2L	3593217	3593218	intergenic	.
2L	3615649	3615650	intergenic	.
2L	3633971	3633972	intron,mRNA	FBgn0000721
2L	3634997	3634998	intron,mRNA	FBgn0000721
2L	3658793	3658794	intergenic	.
2L	3668037	3668038	exon,intron,mRNA,three_prime_UTR	FBgn0259951,FBgn0085369
2L	3677929	3677930	intron,mRNA	FBgn0085369
2L	3681281	3681282	intron,mRNA	FBgn0085369
2L	3692368	3692369	intron,mRNA	FBgn0031558
2L	3695018	3695019	exon,five_prime_UTR,mRNA	FBgn0262721
2L	3702797	3702798	exon	FBgn0265370
2L	3707626	3707627	intron,mRNA	FBgn0015376
2L	3707627	3707628	intron,mRNA	FBgn0015376
2L	3710663	3710664	CDS,exon,mRNA	FBgn0015376
2L	3715577	3715578	CDS,exon,mRNA	FBgn0031566
2L	3742682	3742683	intron,mRNA	FBgn0031568
2L	3753296	3753297	exon,mRNA,three_prime_UTR	FBgn0031568
2L	3755414	3755415	intergenic	.
2L	3758712	3758713	intron,mRNA	FBgn0263846
2L	3758828	3758829	CDS,exon,five_prime_UTR,mRNA	FBgn0263846
2L	3762025	3762026	CDS,exon,mRNA	FBgn0263846
2L	3762575	3762576	intron,mRNA	FBgn0263846
2L	3783284	3783285	exon,mRNA,three_prime_UTR	FBgn0004893
2L	3815368	3815369	upstream	.
2L	3821148	3821149	intergenic	.
2L	3825109	3825110	intergenic	.
2L	3830994	3830995	intergenic	.
2L	3832062	3832063	intergenic	.
2L	3832216	3832217	intergenic	.
2L	3832957	3832958	intergenic	.
2L	3844328	3844329	intergenic	.
2L	3845977	3845978	upstream	.
2L	3847751	3847752	intergenic	.
2L	3858375	3858376	intergenic	.
2L	3858376	3858377	intergenic	.
2L	3858377	3858378	intergenic	.
2L	3876032	3876033	intron,mRNA	FBgn0000256
2L	3876033	3876034	intron,mRNA	FBgn0000256
2L	3876034	3876035	intron,mRNA	FBgn0000256
2L	3879361	3879362	intron,mRNA	FBgn0000256
2L	3879363	3879364	intron,mRNA	FBgn0000256
2L	3893215	3893216	intron,mRNA	FBgn0000256
2L	3895728	3895729	exon,five_prime_UTR,intron,mRNA	FBgn0000256
2L	3903069	3903070	exon,mRNA,three_prime_UTR	FBgn0051774
2L	3911766	3911767	intron,mRNA	FBgn0051774
2L	3924737	3924738	intron,mRNA	FBgn0051774
2L	3936844	3936845	intron,mRNA	FBgn0051774
2L	3938485	3938486	intron,mRNA	FBgn0051774
2L	3939893	3939894	intron,mRNA	FBgn0051774
2L	3941771	3941772	intron,mRNA	FBgn0051774
2L	3944315	3944316	intron,mRNA	FBgn0051774
2L	3944316	3944317	intron,mRNA	FBgn0051774
2L	3944627	3944628	intron,mRNA	FBgn0051774
2L	3945836	3945837	intron,mRNA	FBgn0051774
2L	3958603	3958604	intron,mRNA	FBgn0051774
2L	3972931	3972932	intron,mRNA	FBgn0051774
2L	3974817	3974818	intron,mRNA	FBgn0051774
2L	3977452	3977453	intron,mRNA	FBgn0051774
2L	3984332	3984333	intron,mRNA	FBgn0051774
2L	4008178	4008179	upstream	.
2L	4016270	4016271	intergenic	.
2L	4020702	4020703	intergenic	.
2L	4021255	4021256	intergenic	.
2L	4032258	4032259	intron,mRNA	FBgn0000547
2L	4069055	4069056	intron,mRNA	FBgn0000547
2L	4093461	4093462	intron,mRNA	FBgn0000547
2L	4113506	4113507	intron,mRNA	FBgn0000547
2L	4133471	4133472	intergenic	.
2L	4137414	4137415	intergenic	.
2L	4163886	4163887	intergenic	.
2L	4168041	4168042	intergenic	.
2L	4168043	4168044	intergenic	.
2L	4172683	4172684	intergenic	.
2L	4175569	4175570	intergenic	.
2L	4223204	4223205	intergenic	.
2L	4223208	4223209	intergenic	.
2L	4257554	4257555	upstream	.
2L	4261763	4261764	intergenic	.
2L	4261766	4261767	intergenic	.
2L	4270374	4270375	intergenic	.
2L	4277272	4277273	intergenic	.
2L	4280954	4280955	intron,mRNA	FBgn0031592
2L	4292921	4292922	intron,mRNA	FBgn0010473
2L	4301377	4301378	intron,mRNA	FBgn0010473
2L	4319082	4319083	intron,mRNA	FBgn0010473
2L	4319095	4319096	intron,mRNA	FBgn0010473
2L	4339429	4339430	intron,mRNA	FBgn0020762
2L	4341273	4341274	intron,mRNA	FBgn0020762
2L	4356500	4356501	intergenic	.
2L	4363477	4363478	exon,intron,mRNA	FBgn0266903,FBgn0026319
2L	4367340	4367341	intron,mRNA	FBgn0266903,FBgn0026319
2L	4367593	4367594	intron,mRNA	FBgn0266903,FBgn0026319
2L	4420567	4420568	intron,mRNA	FBgn0031602
2L	4428836	4428837	intron,mRNA	FBgn0031602
2L	4430719	4430720	intron,mRNA	FBgn0031602
2L	4431419	4431420	intron,mRNA	FBgn0031602
2L	4435110	4435111	intron,mRNA	FBgn0031602
2L	4437381	4437382	intron,mRNA	FBgn0031602
2L	4438482	4438483	intron,mRNA	FBgn0031602
2L	4470691	4470692	intron,mRNA	FBgn0011603
2L	4494870	4494871	CDS,exon,intron,mRNA	FBgn0053196
2L	4495415	4495416	CDS,exon,intron,mRNA	FBgn0053196
2L	4623277	4623278	intergenic	.
2L	4658061	4658062	intergenic	.
2L	4682569	4682570	TE,upstream	.
2L	4705611	4705612	TE,exon,five_prime_UTR,mRNA	FBgn0085380
2L	4717243	4717244	intron,mRNA	FBgn0085380
2L	4719158	4719159	intron,mRNA	FBgn0085380
2L	4725358	4725359	intergenic	.
2L	4728418	4728419	intergenic	.
2L	4729729	4729730	intergenic	.
2L	4730119	4730120	intergenic	.
2L	4753256	4753257	intron,mRNA	FBgn0031627
2L	4761369	4761370	intron,mRNA	FBgn0031627
2L	4764324	4764325	intron,mRNA	FBgn0031627
2L	4766268	4766269	intron,mRNA	FBgn0031627
2L	4769420	4769421	intron,mRNA	FBgn0031627
2L	4769421	4769422	intron,mRNA	FBgn0031627
2L	4784355	4784356	intron,mRNA	FBgn0031627
2L	4784356	4784357	intron,mRNA	FBgn0031627
2L	4796588	4796589	intergenic	.
2L	4805739	4805740	intergenic	.
2L	4806377	4806378	intergenic	.
2L	4806378	4806379	intergenic	.
2L	4806625	4806626	intergenic	.
2L	4806626	4806627	intergenic	.
2L	4806627	4806628	intergenic	.
2L	4806904	4806905	intergenic	.
2L	4810524	4810525	intergenic	.
2L	4812205	4812206	upstream	.
2L	4860406	4860407	intron,mRNA	FBgn0051660
2L	4897175	4897176	intron,mRNA	FBgn0031645
2L	4900474	4900475	intron,mRNA	FBgn0031645
2L	4901992	4901993	intron,mRNA	FBgn0031645
2L	4902702	4902703	CDS,exon,mRNA	FBgn0031645
2L	4903461	4903462	exon,mRNA,three_prime_UTR	FBgn0031645
2L	4914832	4914833	intron,mRNA	FBgn0041150
2L	4924210	4924211	intron,mRNA	FBgn0041150
2L	4924244	4924245	intron,mRNA	FBgn0041150
2L	4924626	4924627	intron,mRNA	FBgn0041150
2L	4925367	4925368	intron,mRNA	FBgn0041150
2L	4959399	4959400	CDS,exon,mRNA	FBgn0083960
2L	4968915	4968916	exon,five_prime_UTR,mRNA	FBgn0262467
2L	4975159	4975160	CDS,exon,mRNA	FBgn0031660
2L	5024989	5024990	intron,mRNA	FBgn0016075
2L	5025251	5025252	intron,mRNA	FBgn0016075
2L	5025289	5025290	intron,mRNA	FBgn0016075
2L	5081093	5081094	intron,mRNA	FBgn0031681
2L	5096066	5096067	upstream	.
2L	5096132	5096133	upstream	.
2L	5096133	5096134	upstream	.
2L	5096134	5096135	upstream	.
2L	5096392	5096393	exon,five_prime_UTR,mRNA	FBgn0031683
2L	5099111	5099112	exon,mRNA,three_prime_UTR	FBgn0031683
2L	5099436	5099437	exon,mRNA,three_prime_UTR	FBgn0031684
2L	5124686	5124687	CDS,exon,mRNA	FBgn0261836
2L	5132116	5132117	CDS,exon,intron,mRNA	FBgn0261836
2L	5139077	5139078	intron,mRNA	FBgn0261836
2L	5139080	5139081	intron,mRNA	FBgn0261836
2L	5152539	5152540	intron,mRNA	FBgn0261836
2L	5163519	5163520	CDS,exon,intron,mRNA	FBgn0261836
2L	5174575	5174576	CDS,exon,intron,mRNA	.
2L	5213666	5213667	intron,mRNA	FBgn0031690
2L	5218870	5218871	intron,mRNA	FBgn0031692
2L	5230783	5230784	intron,mRNA	FBgn0003716
2L	5264847	5264848	intron,mRNA	FBgn0031693,FBgn0003716
2L	5264848	5264849	CDS,exon,five_prime_UTR,intron,mRNA,three_prime_UTR	.
2L	5269352	5269353	intron,mRNA	FBgn0031695,FBgn0003716
2L	5269353	5269354	intron,mRNA	FBgn0031695,FBgn0003716
2L	5299482	5299483	intron,mRNA	FBgn0016076
2L	5334467	5334468	intron,mRNA	FBgn0031702
2L	5336364	5336365	intron,mRNA	FBgn0031702
2L	5337558	5337559	intron,mRNA	FBgn0031702
2L	5339195	5339196	exon,mRNA,three_prime_UTR	FBgn0031703
2L	5349750	5349751	intron,mRNA	FBgn0016920
2L	5349780	5349781	intron,mRNA	FBgn0016920
2L	5349781	5349782	intron,mRNA	FBgn0016920
2L	5349786	5349787	intron,mRNA	FBgn0016920
2L	5350191	5350192	intron,mRNA	FBgn0016920
2L	5353534	5353535	intron,mRNA	FBgn0016920
2L	5353838	5353839	intron,mRNA	FBgn0016920
2L	5368245	5368246	intergenic	.
2L	5369597	5369598	TE,intergenic	.
2L	5378504	5378505	intergenic	.
2L	5381817	5381818	intergenic	.
2L	5385278	5385279	intergenic	.
2L	5388541	5388542	exon	FBgn0265958
2L	5401969	5401970	intergenic	.
2L	5404339	5404340	exon,five_prime_UTR,mRNA	FBgn0016660
2L	5430252	5430253	intergenic	.
2L	5434442	5434443	upstream	.
2L	5444357	5444358	intergenic	.
2L	5453301	5453302	intergenic	.
2L	5457328	5457329	intergenic	.
2L	5458959	5458960	intergenic	.
2L	5462142	5462143	intron,mRNA	FBgn0261963
2L	5462231	5462232	intron,mRNA	FBgn0261963
2L	5477317	5477318	intergenic	.
2L	5493116	5493117	intergenic	.
2L	5510410	5510411	intergenic	.
2L	5521188	5521189	CDS,exon,mRNA	FBgn0000318
2L	5522482	5522483	intron,mRNA	FBgn0031710
2L	5522484	5522485	intron,mRNA	FBgn0031710
2L	5522727	5522728	intron,mRNA	FBgn0031710
2L	5554163	5554164	CDS,exon,mRNA	FBgn0031721
2L	5555745	5555746	intron,mRNA	FBgn0004620
2L	5572007	5572008	TE,intergenic	.
2L	5577535	5577536	intergenic	.
2L	5577796	5577797	intergenic	.
2L	5577852	5577853	intergenic	.
2L	5577861	5577862	intergenic	.
2L	5577898	5577899	intergenic	.
2L	5589080	5589081	intergenic	.
2L	5599847	5599848	intergenic	.
2L	5613444	5613445	CDS,exon,mRNA	FBgn0031725
2L	5614072	5614073	intron,mRNA	FBgn0031725
2L	5626471	5626472	exon,mRNA,three_prime_UTR	FBgn0051646
2L	5634533	5634534	intron,mRNA	FBgn0051646
2L	5635799	5635800	intron,mRNA	FBgn0051646
2L	5649918	5649919	intron,mRNA	FBgn0051646
2L	5649920	5649921	intron,mRNA	FBgn0051646
2L	5658056	5658057	intron,mRNA	FBgn0051646
2L	5661862	5661863	intergenic	.
2L	5675861	5675862	intergenic	.
2L	5675935	5675936	intergenic	.
2L	5684211	5684212	intergenic	.
2L	5684212	5684213	intergenic	.
2L	5685456	5685457	intergenic	.
2L	5692232	5692233	intergenic	.
2L	5698114	5698115	intergenic	.
2L	5773688	5773689	intron,mRNA	FBgn0031738
2L	5780319	5780320	intron,mRNA	FBgn0031738
2L	5787129	5787130	intron,mRNA	FBgn0031738
2L	5791750	5791751	intron,mRNA	FBgn0031738
2L	5794190	5794191	intron,mRNA	FBgn0031738
2L	5805973	5805974	intron,mRNA	FBgn0031741
2L	5806308	5806309	intron,mRNA	FBgn0031741
2L	5807452	5807453	CDS,exon,mRNA,three_prime_UTR	FBgn0031741
2L	5818601	5818602	upstream	.
2L	5818602	5818603	upstream	.
2L	5866471	5866472	intron,mRNA	FBgn0031745
2L	5867607	5867608	intron,mRNA	FBgn0031745
2L	5868924	5868925	intron,mRNA	FBgn0031745
2L	5881351	5881352	intergenic	.
2L	5882447	5882448	intergenic	.
2L	5888887	5888888	intergenic	.
2L	5889644	5889645	intergenic	.
2L	5899112	5899113	intergenic	.
2L	5900525	5900526	upstream	.
2L	5912635	5912636	CDS,exon,mRNA	FBgn0043362
2L	5913795	5913796	CDS,exon,mRNA	FBgn0043362
2L	5914044	5914045	CDS,exon,mRNA	FBgn0043362
2L	5914466	5914467	CDS,exon,mRNA	FBgn0043362
2L	5916047	5916048	CDS,exon,mRNA	FBgn0043362
2L	5952644	5952645	intron,mRNA	FBgn0031752
2L	6003155	6003156	exon,mRNA,three_prime_UTR	FBgn0031760
2L	6004745	6004746	CDS,exon,mRNA	FBgn0001089,FBgn0264448
2L	6005942	6005943	CDS,exon,mRNA	FBgn0001089,FBgn0264448
2L	6005943	6005944	CDS,exon,mRNA	FBgn0001089,FBgn0264448
2L	6006293	6006294	exon,intron,mRNA	FBgn0001089,FBgn0264448
2L	6102488	6102489	intron,mRNA	FBgn0266521
2L	6107938	6107939	intron,mRNA	FBgn0266521
2L	6107967	6107968	intron,mRNA	FBgn0266521
2L	6111881	6111882	intron,mRNA	FBgn0266521
2L	6112083	6112084	intron,mRNA	FBgn0266521
2L	6120620	6120621	intron,mRNA	FBgn0266521
2L	6121683	6121684	intron,mRNA	FBgn0266521
2L	6165524	6165525	intergenic	.
2L	6166614	6166615	intergenic	.
2L	6166726	6166727	intergenic	.
2L	6174227	6174228	intergenic	.
2L	6229962	6229963	intergenic	.
2L	6237035	6237036	TE,intergenic	.
2L	6239043	6239044	intergenic	.
2L	6239930	6239931	intergenic	.
2L	6243810	6243811	intergenic	.
2L	6266621	6266622	intron,mRNA	FBgn0053531
2L	6268089	6268090	intron,mRNA	FBgn0053531
2L	6275755	6275756	intron,mRNA	FBgn0053531
2L	6290801	6290802	intron,mRNA	FBgn0053531
2L	6319050	6319051	intron,mRNA	FBgn0053531
2L	6321050	6321051	intron,mRNA	FBgn0053531
2L	6324665	6324666	intron,mRNA	FBgn0265778
2L	6386427	6386428	intron,mRNA	FBgn0259714
2L	6389788	6389789	intron,mRNA	FBgn0259714
2L	6391061	6391062	intron,mRNA	FBgn0259714
2L	6503420	6503421	intron,mRNA	FBgn0051637
2L	6503421	6503422	intron,mRNA	FBgn0051637
2L	6504192	6504193	intron,mRNA	FBgn0051637
2L	6506710	6506711	intron,mRNA	FBgn0051637
2L	6543393	6543394	intron,mRNA	FBgn0000320
2L	6545840	6545841	intron,mRNA	FBgn0000320
2L	6546347	6546348	intron,mRNA	FBgn0000320
2L	6546348	6546349	intron,mRNA	FBgn0000320
2L	6549838	6549839	intergenic	.
2L	6549955	6549956	intergenic	.
2L	6551330	6551331	intergenic	.
2L	6552489	6552490	intergenic	.
2L	6555729	6555730	exon,mRNA,three_prime_UTR	FBgn0031829
2L	6555758	6555759	exon,mRNA,three_prime_UTR	FBgn0031829
2L	6560252	6560253	CDS,exon,mRNA	FBgn0031832
2L	6562711	6562712	CDS,exon,mRNA	FBgn0263916
2L	6567705	6567706	intergenic	.
2L	6567707	6567708	intergenic	.
2L	6585549	6585550	intron,mRNA	FBgn0031835
2L	6590490	6590491	intron,mRNA	FBgn0031835
2L	6599987	6599988	intron,mRNA	FBgn0031835
2L	6602394	6602395	intergenic	.
2L	6602395	6602396	intergenic	.
2L	6602396	6602397	intergenic	.
2L	6625015	6625016	intron,mRNA	FBgn0085374
2L	6625016	6625017	intron,mRNA	FBgn0085374
2L	6625017	6625018	intron,mRNA	FBgn0085374
2L	6626491	6626492	CDS,exon,mRNA	FBgn0051634
2L	6650408	6650409	CDS,exon,mRNA	FBgn0031842
2L	6650674	6650675	CDS,exon,mRNA	FBgn0031842
2L	6691639	6691640	intron,mRNA	FBgn0031850
2L	6707954	6707955	intron,mRNA	FBgn0031850
2L	6711914	6711915	exon,intron,mRNA,three_prime_UTR	FBgn0025595
2L	6718645	6718646	CDS,exon,mRNA	FBgn0031851
2L	6748081	6748082	intron,mRNA	FBgn0031855
2L	6761728	6761729	intron,mRNA	FBgn0031857
2L	6764133	6764134	CDS,exon,mRNA	FBgn0031857
2L	6764846	6764847	CDS,exon,mRNA	FBgn0031857
2L	6765028	6765029	CDS,exon,mRNA	FBgn0031857
2L	6782093	6782094	intron,mRNA	FBgn0015776
2L	6804721	6804722	CDS,exon,mRNA	FBgn0031861
2L	6807195	6807196	intergenic	.
2L	6808918	6808919	intergenic	.
2L	6846822	6846823	intergenic	.
2L	6873739	6873740	intron	FBgn0266219
2L	6892188	6892189	intron,mRNA	FBgn0031866
2L	6906862	6906863	exon,mRNA,three_prime_UTR	FBgn0042092
2L	6907767	6907768	CDS,exon,mRNA	FBgn0042092
2L	6911498	6911499	exon,mRNA,three_prime_UTR	FBgn0011737
2L	6954592	6954593	CDS,exon,mRNA	FBgn0031874
2L	6954593	6954594	CDS,exon,mRNA	FBgn0031874
2L	6960423	6960424	exon,five_prime_UTR,mRNA	FBgn0031877
2L	6986934	6986935	intron,mRNA	FBgn0031879
2L	6987348	6987349	intron,mRNA	FBgn0031879
2L	6990018	6990019	intron,mRNA	FBgn0031879
2L	7012817	7012818	intergenic	.
2L	7013201	7013202	upstream	.
2L	7016693	7016694	CDS,exon,mRNA	FBgn0000053
2L	7016694	7016695	CDS,exon,mRNA	FBgn0000053
2L	7068656	7068657	intron,mRNA	FBgn0031887
2L	7074737	7074738	intron,mRNA	FBgn0031888
2L	7074738	7074739	intron,mRNA	FBgn0031888
2L	7081766	7081767	intron,mRNA	FBgn0031888
2L	7081768	7081769	intron,mRNA	FBgn0031888
2L	7092310	7092311	intergenic	.
2L	7106207	7106208	intron,mRNA	FBgn0085407
2L	7111815	7111816	intron,mRNA	FBgn0085407
2L	7162492	7162493	intergenic	.
2L	7171853	7171854	intergenic	.
2L	7176407	7176408	exon	FBgn0267929
2L	7183524	7183525	CDS,exon,intron,mRNA	FBgn0031893
2L	7200441	7200442	intron,mRNA	FBgn0031896
2L	7200451	7200452	intron,mRNA	FBgn0031896
2L	7216860	7216861	intron,mRNA	FBgn0031897
2L	7219115	7219116	exon,five_prime_UTR,mRNA	FBgn0031897
2L	7237653	7237654	intron,mRNA	FBgn0259111
2L	7238458	7238459	intron,mRNA	FBgn0259111
2L	7238782	7238783	intron,mRNA	FBgn0259111
2L	7244981	7244982	CDS,exon,intron,mRNA	FBgn0259111
2L	7251386	7251387	intron,mRNA	FBgn0031900
2L	7251389	7251390	intron,mRNA	FBgn0031900
2L	7276982	7276983	exon,five_prime_UTR,mRNA	FBgn0010453
2L	7280424	7280425	intergenic	.
2L	7280425	7280426	intergenic	.
2L	7287692	7287693	intergenic	.
2L	7324807	7324808	intergenic	.
2L	7332080	7332081	intergenic	.
2L	7355198	7355199	intergenic	.
2L	7356734	7356735	intergenic	.
2L	7358447	7358448	intergenic	.
2L	7364931	7364932	simple repeat,CDS,exon,mRNA	FBgn0031903
2L	7367004	7367005	intron,mRNA	FBgn0031903
2L	7367005	7367006	intron,mRNA	FBgn0031903
2L	7399173	7399174	upstream	.
2L	7400748	7400749	intergenic	.
2L	7408629	7408630	exon,mRNA,three_prime_UTR	FBgn0031909
2L	7422892	7422893	intergenic	.
2L	7442983	7442984	intron,mRNA	FBgn0031914
2L	7447405	7447406	intron,mRNA	FBgn0025697
2L	7457301	7457302	CDS,exon,intron,mRNA	FBgn0045495
2L	7464060	7464061	intergenic	.
2L	7479447	7479448	CDS,exon,mRNA	FBgn0260486
2L	7481746	7481747	CDS,exon,mRNA	FBgn0260486
2L	7488841	7488842	intron,mRNA	FBgn0260486
2L	7489268	7489269	intron,mRNA	FBgn0260486
2L	7504627	7504628	intron,mRNA	FBgn0264895
2L	7504840	7504841	intron,mRNA	FBgn0264895
2L	7505128	7505129	intron,mRNA	FBgn0264895
2L	7515563	7515564	intron,mRNA	FBgn0264895
2L	7516634	7516635	intron,mRNA	FBgn0264895
2L	7518777	7518778	intron,mRNA	FBgn0264895
2L	7531161	7531162	intron,mRNA	FBgn0264895
2L	7545909	7545910	intron,mRNA	FBgn0264895
2L	7572550	7572551	intron,mRNA	FBgn0264895
2L	7573279	7573280	intron,mRNA	FBgn0264895
2L	7573495	7573496	intron,mRNA	FBgn0264895
2L	7574201	7574202	intron,mRNA	FBgn0264895
2L	7580474	7580475	intergenic	.
2L	7581603	7581604	upstream	.
2L	7595479	7595480	intergenic	.
2L	7599281	7599282	intergenic	.
2L	7609888	7609889	intron,mRNA	FBgn0031926
2L	7617737	7617738	intergenic	.
2L	7625885	7625886	intergenic	.
2L	7627263	7627264	intergenic	.
2L	7633023	7633024	intergenic	.
2L	7639565	7639566	intergenic	.
2L	7641884	7641885	intergenic	.
2L	7648339	7648340	intron,mRNA	FBgn0264087
2L	7651919	7651920	intron,mRNA	FBgn0264087
2L	7652961	7652962	intron,mRNA	FBgn0264087
2L	7653574	7653575	intron,mRNA	FBgn0264087
2L	7654579	7654580	intron,mRNA	FBgn0264087
2L	7654580	7654581	intron,mRNA	FBgn0264087
2L	7656831	7656832	intron,mRNA	FBgn0264087
2L	7658057	7658058	intron,mRNA	FBgn0264087
2L	7691823	7691824	intron,mRNA	FBgn0031930
2L	7702615	7702616	upstream	.
2L	7711439	7711440	intron,mRNA	FBgn0267326
2L	7716641	7716642	exon,five_prime_UTR,mRNA	FBgn0053296
2L	7721599	7721600	intron,mRNA	FBgn0031936
2L	7756628	7756629	CDS,exon,intron,mRNA	FBgn0267689
2L	7757068	7757069	intron,mRNA	FBgn0267689
2L	7757071	7757072	intron,mRNA	FBgn0267689
2L	7757721	7757722	intron,mRNA	FBgn0267689
2L	7760767	7760768	intron,mRNA	FBgn0267689
2L	7767024	7767025	intergenic	.
2L	7767025	7767026	intergenic	.
2L	7779119	7779120	intergenic	.
2L	7788532	7788533	intron,mRNA	FBgn0031948
2L	7794795	7794796	intron,mRNA	FBgn0286198
2L	7794797	7794798	intron,mRNA	FBgn0286198
2L	7805729	7805730	CDS,exon,mRNA	FBgn0031952
2L	7871853	7871854	upstream	.
2L	7872502	7872503	upstream	.
2L	7872503	7872504	upstream	.
2L	7881704	7881705	intergenic	.
2L	7882042	7882043	intergenic	.
2L	7887693	7887694	exon,mRNA,three_prime_UTR	FBgn0051902
2L	7900596	7900597	intron,mRNA	FBgn0085450
2L	7906803	7906804	intron,mRNA	FBgn0085450
2L	7932154	7932155	intron,mRNA	FBgn0085450
2L	7941699	7941700	intron,mRNA	FBgn0085450
2L	7967181	7967182	intron,mRNA	FBgn0085450
2L	8009867	8009868	intron,mRNA	FBgn0054010
2L	8011209	8011210	upstream	.
2L	8027663	8027664	CDS,exon,mRNA	FBgn0031976
2L	8058265	8058266	intron,mRNA	FBgn0011230
2L	8058434	8058435	CDS,exon,mRNA	FBgn0011230
2L	8080177	8080178	CDS,exon,mRNA	FBgn0267488
2L	8082186	8082187	intron,mRNA	FBgn0267488
2L	8083222	8083223	upstream	.
2L	8087809	8087810	intron,mRNA	FBgn0261822
2L	8105802	8105803	CDS,exon,mRNA	FBgn0261822
2L	8108946	8108947	exon,intron,mRNA,three_prime_UTR	FBgn0261822
2L	8120603	8120604	intron,mRNA	FBgn0031985
2L	8122164	8122165	CDS,exon,mRNA	FBgn0031985
2L	8122630	8122631	intron,mRNA	FBgn0031985
2L	8144069	8144070	intron,mRNA	FBgn0031990
2L	8151569	8151570	intron,mRNA	FBgn0263256,FBgn0031990
2L	8161967	8161968	CDS,exon,mRNA	FBgn0031992
2L	8163738	8163739	intron,mRNA	FBgn0264953
2L	8183622	8183623	intron,mRNA	FBgn0264953
2L	8193485	8193486	exon,intron,mRNA,three_prime_UTR	FBgn0031995
2L	8193490	8193491	exon,intron,mRNA,three_prime_UTR	FBgn0031995
2L	8197829	8197830	intron,mRNA	FBgn0031996
2L	8243896	8243897	intron,mRNA	FBgn0262359
2L	8253499	8253500	intron,mRNA	FBgn0032010
2L	8254987	8254988	intron,mRNA	FBgn0032010
2L	8258825	8258826	exon,mRNA,three_prime_UTR	FBgn0003502
2L	8271274	8271275	intron,mRNA	FBgn0003502
2L	8283226	8283227	intron,mRNA	FBgn0003502
2L	8283227	8283228	intron,mRNA	FBgn0003502
2L	8288941	8288942	intron,mRNA	FBgn0003502
2L	8307755	8307756	CDS,exon,mRNA	FBgn0032015
2L	8362642	8362643	upstream	.
2L	8363218	8363219	intergenic	.
2L	8374251	8374252	upstream	.
2L	8376521	8376522	CDS,exon,mRNA	FBgn0032031
2L	8377012	8377013	upstream	.
2L	8402622	8402623	CDS,exon,mRNA	FBgn0001084
2L	8403692	8403693	intron,mRNA	FBgn0266326,FBgn0020497
2L	8432634	8432635	intron,mRNA	FBgn0001137
2L	8480573	8480574	intron,mRNA	FBgn0262029
2L	8480799	8480800	intron,mRNA	FBgn0262029
2L	8481859	8481860	intron,mRNA	FBgn0262029
2L	8502837	8502838	intron,mRNA	FBgn0032048
2L	8510023	8510024	CDS,exon,mRNA	FBgn0032050
2L	8518713	8518714	CDS,exon,mRNA	FBgn0032054
2L	8530708	8530709	intron,mRNA	FBgn0028394
2L	8532287	8532288	intron,mRNA	FBgn0028394
2L	8532288	8532289	intron,mRNA	FBgn0028394
2L	8533624	8533625	intron,mRNA	FBgn0028394
2L	8535022	8535023	intron,mRNA	FBgn0028394
2L	8535024	8535025	intron,mRNA	FBgn0028394
2L	8535025	8535026	intron,mRNA	FBgn0028394
2L	8549855	8549856	intron,mRNA	FBgn0011259
2L	8549856	8549857	intron,mRNA	FBgn0011259
2L	8550716	8550717	intron,mRNA	FBgn0011259
2L	8584738	8584739	intron,mRNA	FBgn0011259
2L	8603424	8603425	intron,mRNA	FBgn0011259
2L	8627275	8627276	intron,mRNA	FBgn0011259
2L	8642385	8642386	intron,mRNA	FBgn0011259
2L	8669289	8669290	exon,mRNA,three_prime_UTR	FBgn0011259
2L	8669292	8669293	exon,mRNA,three_prime_UTR	FBgn0011259
2L	8670412	8670413	exon,mRNA,three_prime_UTR	FBgn0011259
2L	8674213	8674214	CDS,exon,mRNA	FBgn0001114
2L	8693608	8693609	intron,mRNA	FBgn0004914
2L	8699436	8699437	exon,five_prime_UTR,intron,mRNA	FBgn0004914
2L	8701072	8701073	intron,mRNA	FBgn0004914
2L	8704110	8704111	exon,intron,mRNA	FBgn0266327,FBgn0004914
2L	8704329	8704330	exon,intron,mRNA	FBgn0266327,FBgn0004914
2L	8705464	8705465	intron,mRNA	FBgn0004914
2L	8705661	8705662	exon,five_prime_UTR,intron,mRNA	FBgn0032061,FBgn0004914
2L	8712743	8712744	CDS,exon,mRNA	FBgn0003209
2L	8715976	8715977	intron,mRNA	FBgn0003209
2L	8716869	8716870	intron,mRNA	FBgn0003209
2L	8716870	8716871	intron,mRNA	FBgn0003209
2L	8716913	8716914	intron,mRNA	FBgn0003209
2L	8719014	8719015	intron,mRNA	FBgn0003209
2L	8719930	8719931	intron,mRNA	FBgn0003209
2L	8721721	8721722	intron,mRNA	FBgn0003209
2L	8732537	8732538	intron,mRNA	FBgn0003209
2L	8747347	8747348	intergenic	.
2L	8749733	8749734	intergenic	.
2L	8756504	8756505	intergenic	.
2L	8761590	8761591	intergenic	.
2L	8769036	8769037	upstream	.
2L	8796817	8796818	intergenic	.
2L	8810981	8810982	intergenic	.
2L	8811214	8811215	intergenic	.
2L	8822917	8822918	intergenic	.
2L	8822920	8822921	intergenic	.
2L	8838661	8838662	intergenic	.
2L	8838810	8838811	intergenic	.
2L	8843108	8843109	intergenic	.
2L	8858238	8858239	intergenic	.
2L	8869983	8869984	intergenic	.
2L	8869994	8869995	intergenic	.
2L	8887309	8887310	exon	FBgn0265588
2L	8890567	8890568	intergenic	.
2L	8896969	8896970	intergenic	.
2L	8945204	8945205	intron,mRNA	FBgn0032078
2L	8945920	8945921	intron,mRNA	FBgn0032078
2L	8947990	8947991	intron,mRNA	FBgn0032078
2L	8948639	8948640	intron,mRNA	FBgn0032078
2L	8950482	8950483	intron,mRNA	FBgn0032078
2L	8957485	8957486	intron,mRNA	FBgn0032079
2L	8967667	8967668	CDS,exon,mRNA	FBgn0032082
2L	8967668	8967669	CDS,exon,mRNA	FBgn0032082
2L	8969085	8969086	CDS,exon,mRNA	FBgn0032082
2L	8975336	8975337	exon,five_prime_UTR,mRNA	FBgn0032083
2L	8976111	8976112	intergenic	.
2L	8980589	8980590	intron,mRNA	FBgn0032084
2L	8991365	8991366	upstream	.
2L	8993106	8993107	CDS,exon,mRNA	FBgn0032085
2L	8993631	8993632	intergenic	FBgn0032085
2L	8993665	8993666	intergenic	.
2L	8999368	8999369	TE,CDS,exon,mRNA	FBgn0015316
2L	8999503	8999504	exon,mRNA,three_prime_UTR	FBgn0015316
2L	9000208	9000209	intergenic	.
2L	9008315	9008316	intergenic	.
2L	9009814	9009815	intergenic	.
2L	9011221	9011222	CDS,exon,mRNA	FBgn0032087
2L	9012959	9012960	exon,mRNA,three_prime_UTR	FBgn0032088,FBgn0032089
2L	9013051	9013052	CDS,exon,mRNA,three_prime_UTR	FBgn0032088,FBgn0032089
2L	9014625	9014626	intergenic	.
2L	9015150	9015151	intergenic	.
2L	9015591	9015592	intergenic	.
2L	9017035	9017036	intergenic	.
2L	9026545	9026546	intron,mRNA	FBgn0032090,FBgn0265452
2L	9032709	9032710	intergenic	.
2L	9036417	9036418	intergenic	.
2L	9053868	9053869	intron,mRNA	FBgn0051708
2L	9054683	9054684	intron,mRNA	FBgn0051708
2L	9057532	9057533	intron,mRNA	FBgn0051708
2L	9063191	9063192	intron,mRNA	FBgn0051708
2L	9087033	9087034	CDS,exon,mRNA	FBgn0032095
2L	9091053	9091054	intergenic	.
2L	9091071	9091072	intergenic	.
2L	9098554	9098555	intergenic	.
2L	9131348	9131349	intron,mRNA	FBgn0052982
2L	9131433	9131434	intron,mRNA	FBgn0052982
2L	9132254	9132255	intron,mRNA	FBgn0052982
2L	9134164	9134165	intron,mRNA	FBgn0052982
2L	9135478	9135479	intron,mRNA	FBgn0052982
2L	9137937	9137938	intron,mRNA	FBgn0052982
2L	9145241	9145242	intron,mRNA	FBgn0052982
2L	9148495	9148496	intron,mRNA	FBgn0052982
2L	9155695	9155696	intron,mRNA	FBgn0052982
2L	9157271	9157272	intron,mRNA	FBgn0052982
2L	9160483	9160484	intron,mRNA	FBgn0052982
2L	9173535	9173536	intron,mRNA	FBgn0041092
2L	9175182	9175183	intron,mRNA	FBgn0041092
2L	9177850	9177851	intron,mRNA	.
2L	9179174	9179175	intron,mRNA	FBgn0041092
2L	9179176	9179177	intron,mRNA	FBgn0041092
2L	9179177	9179178	intron,mRNA	FBgn0041092
2L	9179453	9179454	intron,mRNA	FBgn0041092
2L	9180120	9180121	intron,mRNA	FBgn0041092
2L	9180165	9180166	intron,mRNA	FBgn0041092
2L	9182322	9182323	intron,mRNA	FBgn0041092
2L	9186053	9186054	intron,mRNA	FBgn0041092
2L	9205461	9205462	intron,mRNA	FBgn0041092
2L	9205911	9205912	intron,mRNA	FBgn0041092
2L	9209981	9209982	intron,mRNA	FBgn0041092
2L	9209983	9209984	intron,mRNA	FBgn0041092
2L	9210585	9210586	intron,mRNA	FBgn0041092
2L	9211529	9211530	intron,mRNA	FBgn0041092
2L	9223161	9223162	intron,mRNA	FBgn0041092
2L	9223835	9223836	intron,mRNA	FBgn0041092
2L	9225341	9225342	intron,mRNA	FBgn0041092
2L	9273472	9273473	intron,mRNA	FBgn0267252
2L	9273475	9273476	intron,mRNA	FBgn0267252
2L	9298157	9298158	exon,mRNA,three_prime_UTR	FBgn0267252
2L	9298158	9298159	exon,mRNA,three_prime_UTR	FBgn0267252
2L	9300705	9300706	exon,mRNA,three_prime_UTR	FBgn0267252
2L	9305254	9305255	upstream	.
2L	9305255	9305256	upstream	.
2L	9305319	9305320	upstream	.
2L	9314391	9314392	intergenic	.
2L	9318465	9318466	intergenic	.
2L	9318470	9318471	intergenic	.
2L	9320354	9320355	intergenic	.
2L	9320634	9320635	intergenic	.
2L	9323094	9323095	intergenic	.
2L	9324801	9324802	intergenic	.
2L	9325513	9325514	upstream	.
2L	9325514	9325515	upstream	.
2L	9327215	9327216	exon	FBgn0267013
2L	9338714	9338715	CDS,exon,mRNA	FBgn0026439
2L	9339434	9339435	intron,mRNA	FBgn0026439
2L	9339607	9339608	intron,mRNA	FBgn0026439
2L	9340228	9340229	CDS,exon,mRNA	FBgn0026439
2L	9340667	9340668	intron,mRNA	FBgn0026439
2L	9340692	9340693	intron,mRNA	FBgn0026439
2L	9352013	9352014	intergenic	.
2L	9354132	9354133	intergenic	.
2L	9393219	9393220	intron,mRNA	FBgn0085395
2L	9398110	9398111	intron,mRNA	FBgn0085395
2L	9412132	9412133	intron,mRNA	FBgn0085395
2L	9412352	9412353	intron,mRNA	FBgn0085395
2L	9412353	9412354	intron,mRNA	FBgn0085395
2L	9415574	9415575	upstream	.
2L	9416709	9416710	intron,mRNA	FBgn0032116
2L	9428376	9428377	CDS,exon,mRNA	FBgn0262036
2L	9450890	9450891	intron,mRNA	FBgn0002973
2L	9452630	9452631	intron,mRNA	FBgn0002973
2L	9452632	9452633	intron,mRNA	FBgn0002973
2L	9456806	9456807	intron,mRNA	FBgn0002973
2L	9458217	9458218	intron,mRNA	FBgn0002973
2L	9477561	9477562	intergenic	.
2L	9510012	9510013	intron,mRNA	FBgn0032120
2L	9510014	9510015	intron,mRNA	FBgn0032120
2L	9513659	9513660	intron,mRNA	FBgn0032120
2L	9567388	9567389	intergenic	.
2L	9567389	9567390	intergenic	.
2L	9567392	9567393	intergenic	.
2L	9582488	9582489	intergenic	.
2L	9582592	9582593	intergenic	.
2L	9584291	9584292	intergenic	.
2L	9595110	9595111	intergenic	.
2L	9595112	9595113	intergenic	.
2L	9596444	9596445	intergenic	.
2L	9598541	9598542	intergenic	.
2L	9598786	9598787	intergenic	.
2L	9600190	9600191	TE,CDS,exon,mRNA	FBgn0032132
2L	9600527	9600528	CDS,exon,mRNA	FBgn0032132
2L	9604957	9604958	intergenic	.
2L	9606641	9606642	intergenic	.
2L	9607196	9607197	intergenic	.
2L	9608926	9608927	intron,mRNA	FBgn0019809
2L	9615887	9615888	exon,mRNA,three_prime_UTR	FBgn0040070
2L	9628602	9628603	intergenic	.
2L	9648926	9648927	intron,mRNA	FBgn0032136
2L	9653787	9653788	intron,mRNA	FBgn0032136
2L	9654155	9654156	intron,mRNA	FBgn0032136
2L	9654156	9654157	intron,mRNA	FBgn0032136
2L	9654157	9654158	intron,mRNA	FBgn0032136
2L	9662317	9662318	intergenic	.
2L	9662318	9662319	intergenic	.
2L	9686105	9686106	intron,mRNA	FBgn0000273
2L	9707279	9707280	intron,mRNA	FBgn0011207
2L	9707729	9707730	intron,mRNA	FBgn0011207
2L	9746915	9746916	upstream	.
2L	9773092	9773093	exon,five_prime_UTR,three_prime_UTR	.
2L	9779682	9779683	intergenic	.
2L	9780031	9780032	intergenic	.
2L	9786208	9786209	intron,mRNA	FBgn0032147
2L	9805011	9805012	intron,mRNA	FBgn0032151
2L	9805012	9805013	intron,mRNA	FBgn0032151
2L	9811817	9811818	intron,mRNA	FBgn0032151
2L	9816840	9816841	intron,mRNA	FBgn0032151
2L	9829400	9829401	intron,mRNA	FBgn0032151
2L	9829401	9829402	intron,mRNA	FBgn0032151
2L	9829402	9829403	intron,mRNA	FBgn0032151
2L	9838952	9838953	intron,mRNA	FBgn0032151
2L	9847777	9847778	intron,mRNA	FBgn0032151
2L	9853483	9853484	intron,mRNA	FBgn0032151
2L	9853701	9853702	intron,mRNA	FBgn0032151
2L	9855209	9855210	intron,mRNA	FBgn0032151
2L	9855567	9855568	intron,mRNA	FBgn0032151
2L	9856883	9856884	intron,mRNA	FBgn0032151
2L	9871706	9871707	intron,mRNA	FBgn0032151
2L	9872914	9872915	intron,mRNA	FBgn0032151
2L	9872916	9872917	intron,mRNA	FBgn0032151
2L	9886045	9886046	exon,five_prime_UTR,mRNA	FBgn0032151
2L	9886047	9886048	exon,five_prime_UTR,mRNA	FBgn0032151
2L	9887309	9887310	exon	FBgn0265912
2L	9888991	9888992	intron,mRNA	FBgn0029174
2L	9906192	9906193	exon,five_prime_UTR,mRNA	FBgn0032156
2L	9920386	9920387	CDS,exon,mRNA	FBgn0032161
2L	9943251	9943252	intron,mRNA	FBgn0032167
2L	9948431	9948432	upstream	.
2L	9951855	9951856	intergenic	.
2L	9971298	9971299	intergenic	.
2L	9972092	9972093	intergenic	.
2L	9984754	9984755	exon,five_prime_UTR,mRNA	FBgn0000180
2L	9997708	9997709	CDS,exon,intron,mRNA	FBgn0051875,FBgn0051755
2L	10000294	10000295	CDS,exon,intron,mRNA	FBgn0051875,FBgn0051755
2L	10009656	10009657	intron,mRNA	FBgn0011584
2L	10014484	10014485	CDS,exon,mRNA	FBgn0032175
2L	10022161	10022162	intergenic	.
2L	10022164	10022165	intergenic	.
2L	10032779	10032780	intron,mRNA	FBgn0027600
2L	10032780	10032781	intron,mRNA	FBgn0027600
2L	10033535	10033536	intron,mRNA	FBgn0027600
2L	10034028	10034029	intron,mRNA	FBgn0027600
2L	10100098	10100099	intron,mRNA	FBgn0083945,FBgn0265002
2L	10102097	10102098	intron,mRNA	FBgn0083945,FBgn0265002
2L	10107519	10107520	intron,mRNA	FBgn0083945,FBgn0265002
2L	10134322	10134323	intron,mRNA	FBgn0265002
2L	10134384	10134385	intron,mRNA	FBgn0265002
2L	10153280	10153281	intron,mRNA	FBgn0032187,FBgn0265002
2L	10164529	10164530	intron,mRNA	FBgn0265002
2L	10171395	10171396	intron,mRNA	FBgn0265002
2L	10171746	10171747	TE,intron,mRNA	FBgn0265002
2L	10210186	10210187	intron,mRNA	FBgn0032193
2L	10210187	10210188	intron,mRNA	FBgn0032193
2L	10210373	10210374	CDS,exon,mRNA	FBgn0032193
2L	10211066	10211067	upstream	.
2L	10211146	10211147	exon,five_prime_UTR,mRNA	FBgn0032194
2L	10246083	10246084	intron,mRNA	FBgn0024248
2L	10281276	10281277	upstream	.
2L	10294343	10294344	intron,mRNA	FBgn0032209
2L	10313735	10313736	intron,mRNA	FBgn0032216
2L	10320526	10320527	intron,mRNA	FBgn0032218
2L	10359102	10359103	CDS,exon,mRNA	FBgn0027568
2L	10368478	10368479	intron,mRNA	FBgn0041723
2L	10368479	10368480	intron,mRNA	FBgn0041723
2L	10368480	10368481	intron,mRNA	FBgn0041723
2L	10375866	10375867	upstream	.
2L	10378446	10378447	intron,mRNA	FBgn0032233
2L	10378447	10378448	intron,mRNA	FBgn0032233
2L	10378448	10378449	intron,mRNA	FBgn0032233
2L	10406061	10406062	CDS,exon,mRNA	FBgn0051718
2L	10420683	10420684	exon,mRNA,three_prime_UTR	FBgn0005683
2L	10420695	10420696	exon,mRNA,three_prime_UTR	FBgn0005683
2L	10420699	10420700	exon,mRNA,three_prime_UTR	FBgn0005683
2L	10435802	10435803	upstream	.
2L	10440941	10440942	exon,mRNA,three_prime_UTR	FBgn0032251
2L	10441035	10441036	exon,mRNA,three_prime_UTR	FBgn0032251
2L	10444032	10444033	intron,mRNA	FBgn0032252
2L	10445723	10445724	CDS,exon,mRNA	FBgn0032252
2L	10463325	10463326	intergenic	.
2L	10468616	10468617	TE,intron,mRNA	FBgn0051719
2L	10469570	10469571	intron,mRNA	FBgn0051719
2L	10469579	10469580	intron,mRNA	FBgn0051719
2L	10476770	10476771	upstream	.
2L	10479764	10479765	intron,mRNA	FBgn0032256
2L	10492774	10492775	intron,mRNA	FBgn0086347
2L	10504600	10504601	intron,mRNA	FBgn0086347
2L	10509346	10509347	intron,mRNA	FBgn0032262
2L	10510626	10510627	upstream	.
2L	10513279	10513280	CDS,exon,mRNA	FBgn0267828
2L	10513280	10513281	CDS,exon,mRNA	FBgn0267828
2L	10515736	10515737	intron,mRNA	FBgn0267828
2L	10526040	10526041	intergenic	.
2L	10526641	10526642	intergenic	.
2L	10538366	10538367	intergenic	.
2L	10538807	10538808	intergenic	.
2L	10542722	10542723	intergenic	.
2L	10542773	10542774	intergenic	.
2L	10543472	10543473	exon	FBgn0265829
2L	10553574	10553575	intron,mRNA	FBgn0051721
2L	10555256	10555257	intron,mRNA	FBgn0051721
2L	10591103	10591104	intron,mRNA	FBgn0051721
2L	10594322	10594323	TE,intron,mRNA	FBgn0051721
2L	10599711	10599712	TE,intron,mRNA	FBgn0051721
2L	10599712	10599713	TE,intron,mRNA	FBgn0051721
2L	10610046	10610047	intron,mRNA	FBgn0051721
2L	10611304	10611305	intron,mRNA	FBgn0051721
2L	10613161	10613162	intron,mRNA	FBgn0051721
2L	10626498	10626499	intron,mRNA	FBgn0051721
2L	10631237	10631238	intron,mRNA	FBgn0032271
2L	10632851	10632852	intron,mRNA	FBgn0032271
2L	10698928	10698929	intergenic	.
2L	10706685	10706686	intron,mRNA	FBgn0024740
2L	10748949	10748950	intron,mRNA	FBgn0032297
2L	10753566	10753567	exon,five_prime_UTR,intron,mRNA	FBgn0032297
2L	10759791	10759792	intergenic	.
2L	10794961	10794962	intron,mRNA	FBgn0051869
2L	10811608	10811609	intron,mRNA	FBgn0011676
2L	10827246	10827247	intron,mRNA	FBgn0011676
2L	10828041	10828042	intron,mRNA	FBgn0011676
2L	10865505	10865506	intergenic	.
2L	10907736	10907737	CDS,exon,mRNA	FBgn0032314
2L	10916190	10916191	intergenic	.
2L	10916191	10916192	intergenic	.
2L	10934074	10934075	intron,mRNA	FBgn0261871
2L	10936673	10936674	exon,five_prime_UTR,intron,mRNA	FBgn0032318,FBgn0261871
2L	10936674	10936675	exon,five_prime_UTR,intron,mRNA	FBgn0032318,FBgn0261871
2L	10938654	10938655	intron,mRNA	FBgn0261871
2L	10962710	10962711	intron,mRNA	FBgn0261871
2L	10962813	10962814	intron,mRNA	FBgn0261871
2L	10964660	10964661	intergenic	.
2L	10964737	10964738	intergenic	.
2L	10964738	10964739	intergenic	.
2L	10964739	10964740	intergenic	.
2L	10965935	10965936	intron,mRNA	FBgn0053129
2L	10992711	10992712	CDS,exon,mRNA	FBgn0026147
2L	11008275	11008276	intron,mRNA	FBgn0021761
2L	11009155	11009156	CDS,exon,mRNA	FBgn0021761
2L	11192262	11192263	intron,mRNA	FBgn0259822
2L	11199330	11199331	intron,mRNA	FBgn0259822
2L	11211636	11211637	intron,mRNA	FBgn0264442
2L	11269180	11269181	upstream	.
2L	11269181	11269182	upstream	.
2L	11269428	11269429	upstream	.
2L	11275585	11275586	CDS,exon,mRNA	FBgn0040233
2L	11288344	11288345	intergenic	.
2L	11288345	11288346	intergenic	.
2L	11309636	11309637	intergenic	.
2L	11335780	11335781	intergenic	.
2L	11352647	11352648	intergenic	.
2L	11374295	11374296	intergenic	.
2L	11386557	11386558	intergenic	.
2L	11409860	11409861	intergenic	.
2L	11419999	11420000	intergenic	.
2L	11450144	11450145	intergenic	.
2L	11474546	11474547	intergenic	.
2L	11486923	11486924	exon,three_prime_UTR	.
2L	11519460	11519461	CDS,exon,mRNA	FBgn0032364
2L	11523106	11523107	exon,mRNA,three_prime_UTR	FBgn0028490
2L	11525041	11525042	CDS,exon,mRNA	FBgn0028490
2L	11579596	11579597	intergenic	.
2L	11591895	11591896	intron,mRNA	FBgn0015400
2L	11601646	11601647	intron,mRNA	FBgn0015400
2L	11601709	11601710	intron,mRNA	FBgn0015400
2L	11628388	11628389	intergenic	.
2L	11633664	11633665	intergenic	.
2L	11633665	11633666	intergenic	.
2L	11645872	11645873	intron,mRNA	FBgn0032369
2L	11659104	11659105	intergenic	.
2L	11662561	11662562	upstream	.
2L	11663894	11663895	intergenic	.
2L	11663895	11663896	intergenic	.
2L	11677903	11677904	intergenic	.
2L	11694667	11694668	upstream	.
2L	11747554	11747555	intergenic	.
2L	11747555	11747556	intergenic	.
2L	11747653	11747654	intergenic	.
2L	11787160	11787161	intergenic	.
2L	11843478	11843479	exon,five_prime_UTR,intron,mRNA,three_prime_UTR	FBgn0264815
2L	11854471	11854472	intron,mRNA	FBgn0264815
2L	11861815	11861816	intron,mRNA	FBgn0264815
2L	11875971	11875972	intron,mRNA	FBgn0264815
2L	11885213	11885214	intron,mRNA	FBgn0264815
2L	11902124	11902125	intron,mRNA	FBgn0264815
2L	11902126	11902127	intron,mRNA	FBgn0264815
2L	11902893	11902894	intron,mRNA	FBgn0264815
2L	11902894	11902895	intron,mRNA	FBgn0264815
2L	11921173	11921174	intron,mRNA	FBgn0264815
2L	11925037	11925038	intron,mRNA	FBgn0264815
2L	11925289	11925290	intron,mRNA	FBgn0264815
2L	11929724	11929725	intergenic	.
2L	11929726	11929727	intergenic	.
2L	11929808	11929809	intergenic	.
2L	11933459	11933460	intergenic	.
2L	11933516	11933517	intergenic	.
2L	11936463	11936464	CDS,exon,mRNA	FBgn0026391
2L	11938116	11938117	CDS,exon,mRNA	FBgn0026390
2L	11941811	11941812	intergenic	.
2L	11941976	11941977	intergenic	.
2L	11943280	11943281	TE,intergenic	.
2L	11950732	11950733	intergenic	.
2L	11951310	11951311	intergenic	.
2L	11951322	11951323	intergenic	.
2L	11951355	11951356	intergenic	.
2L	11967629	11967630	intron	FBgn0263019
2L	11970752	11970753	exon	FBgn0263019
2L	11983109	11983110	intron,mRNA	FBgn0032387
2L	12018727	12018728	CDS,exon,mRNA	FBgn0032395
2L	12030245	12030246	intron,mRNA	FBgn0010497
2L	12034654	12034655	CDS,exon,mRNA	FBgn0042126
2L	12054888	12054889	intron,mRNA	FBgn0028425
2L	12055685	12055686	intron,mRNA	FBgn0028425
2L	12061667	12061668	CDS,exon,mRNA	FBgn0027505
2L	12087034	12087035	exon	FBgn0265804
2L	12087620	12087621	exon	FBgn0265804
2L	12088449	12088450	intergenic	.
2L	12090293	12090294	intergenic	.
2L	12113053	12113054	intergenic	.
2L	12150818	12150819	intron,mRNA	FBgn0051760
2L	12150819	12150820	intron,mRNA	FBgn0051760
2L	12150822	12150823	intron,mRNA	FBgn0051760
2L	12151446	12151447	intron,mRNA	FBgn0051760
2L	12151447	12151448	intron,mRNA	FBgn0051760
2L	12155166	12155167	intron,mRNA	FBgn0051760
2L	12155405	12155406	intron,mRNA	FBgn0051760
2L	12156064	12156065	intron,mRNA	FBgn0051760
2L	12163118	12163119	intron,mRNA	FBgn0051760
2L	12170946	12170947	intron,mRNA	FBgn0032419
2L	12176134	12176135	intron,mRNA	FBgn0032422,FBgn0000114
2L	12187314	12187315	intron,mRNA	FBgn0000114
2L	12197557	12197558	intron,mRNA	FBgn0000114
2L	12197862	12197863	intron,mRNA	FBgn0000114
2L	12197954	12197955	intron,mRNA	FBgn0000114
2L	12198477	12198478	intron,mRNA	FBgn0000114
2L	12214246	12214247	intron,mRNA	FBgn0000114
2L	12218692	12218693	exon,five_prime_UTR,intron,mRNA	.
2L	12233459	12233460	intron,mRNA	FBgn0000114
2L	12246766	12246767	intron,mRNA	FBgn0000114
2L	12265395	12265396	intron,mRNA	FBgn0000114
2L	12285190	12285191	intron,mRNA	FBgn0000114
2L	12290436	12290437	intron,mRNA	FBgn0000114
2L	12291296	12291297	intron,mRNA	FBgn0000114
2L	12295240	12295241	intron,mRNA	FBgn0000114
2L	12295284	12295285	intron,mRNA	FBgn0000114
2L	12295461	12295462	intron,mRNA	FBgn0000114
2L	12315768	12315769	intergenic	.
2L	12337295	12337296	intergenic	.
2L	12337344	12337345	intergenic	.
2L	12363986	12363987	intron,mRNA	FBgn0262475
2L	12364077	12364078	intron,mRNA	FBgn0262475
2L	12364178	12364179	intron,mRNA	FBgn0262475
2L	12369107	12369108	intron,mRNA	FBgn0262475
2L	12372868	12372869	intron,mRNA	FBgn0262475
2L	12372921	12372922	intron,mRNA	FBgn0262475
2L	12379746	12379747	intron,mRNA	FBgn0262475
2L	12411554	12411555	intron,mRNA	FBgn0043841
2L	12414839	12414840	intron,mRNA	FBgn0043841
2L	12414855	12414856	intron,mRNA	FBgn0043841
2L	12414857	12414858	intron,mRNA	FBgn0043841
2L	12423598	12423599	upstream	.
2L	12440943	12440944	exon,mRNA,three_prime_UTR	FBgn0020443
2L	12441012	12441013	exon,mRNA,three_prime_UTR	FBgn0020443
2L	12444452	12444453	exon,five_prime_UTR,mRNA	FBgn0032433
2L	12445754	12445755	exon,five_prime_UTR,mRNA	FBgn0032433
2L	12459224	12459225	intron,mRNA	FBgn0259176
2L	12460394	12460395	intron,mRNA	FBgn0259176
2L	12465518	12465519	intron,mRNA	FBgn0259176
2L	12476988	12476989	intron,mRNA	FBgn0259176
2L	12477041	12477042	intron,mRNA	FBgn0259176
2L	12483068	12483069	exon,five_prime_UTR,intron,mRNA	FBgn0259176
2L	12484969	12484970	intron,mRNA	FBgn0259176
2L	12493594	12493595	intron,mRNA	FBgn0259176
2L	12493595	12493596	intron,mRNA	FBgn0259176
2L	12493999	12494000	intron,mRNA	FBgn0259176
2L	12494003	12494004	intron,mRNA	FBgn0259176
2L	12494022	12494023	intron,mRNA	FBgn0259176
2L	12494121	12494122	intron,mRNA	FBgn0259176
2L	12501018	12501019	intron,mRNA	FBgn0259176
2L	12501512	12501513	intron,mRNA	FBgn0259176
2L	12501513	12501514	intron,mRNA	FBgn0259176
2L	12511641	12511642	intron,mRNA	FBgn0259176
2L	12515605	12515606	intron,mRNA	FBgn0259176
2L	12521248	12521249	intron,mRNA	FBgn0259176
2L	12548639	12548640	intergenic	.
2L	12583705	12583706	intergenic	.
2L	12596807	12596808	intron,mRNA	FBgn0085424
2L	12596810	12596811	intron,mRNA	FBgn0085424
2L	12598100	12598101	intron,mRNA	FBgn0085424
2L	12616795	12616796	intron,mRNA	FBgn0085424,FBgn0032439
2L	12632257	12632258	intron,mRNA	FBgn0032439
2L	12640070	12640071	intron,mRNA	FBgn0032439
2L	12640715	12640716	intron,mRNA	FBgn0032439
2L	12640716	12640717	intron,mRNA	FBgn0032439
2L	12640717	12640718	intron,mRNA	FBgn0032439
2L	12643132	12643133	intron,mRNA	FBgn0032439
2L	12666015	12666016	intron,mRNA	FBgn0004394
2L	12669026	12669027	CDS,exon,intron,mRNA	FBgn0032442,FBgn0004394
2L	12669028	12669029	CDS,exon,intron,mRNA	FBgn0032442,FBgn0004394
2L	12671251	12671252	intron,mRNA	FBgn0004394
2L	12672633	12672634	intron,mRNA	FBgn0004394
2L	12680151	12680152	intron,mRNA	FBgn0004394
2L	12696107	12696108	exon,five_prime_UTR,intron,mRNA	FBgn0032447
2L	12696804	12696805	CDS,exon,intron,mRNA	FBgn0032448,FBgn0032447
2L	12699692	12699693	CDS,exon,mRNA	FBgn0032449
2L	12707037	12707038	CDS,exon,mRNA	FBgn0032452
2L	12728300	12728301	intron,mRNA	FBgn0032456
2L	12761333	12761334	CDS,exon,intron,mRNA	FBgn0032457,FBgn0032456
2L	12762159	12762160	intron,mRNA	FBgn0032456
2L	12762867	12762868	intron,mRNA	FBgn0032456
2L	12762868	12762869	intron,mRNA	FBgn0032456
2L	12762929	12762930	intron,mRNA	FBgn0032456
2L	12766066	12766067	intron,mRNA	FBgn0032456
2L	12766087	12766088	intron,mRNA	FBgn0032456
2L	12768901	12768902	upstream	.
2L	12768903	12768904	upstream	.
2L	12772717	12772718	intergenic	.
2L	12836921	12836922	intergenic	.
2L	12840595	12840596	upstream	.
2L	12841467	12841468	upstream	.
2L	12874487	12874488	intergenic	.
2L	12905491	12905492	intergenic	.
2L	12908675	12908676	intergenic	.
2L	12916421	12916422	CDS,exon,mRNA,three_prime_UTR	FBgn0040508
2L	12923756	12923757	intron,mRNA	FBgn0040510
2L	12929434	12929435	CDS,exon,mRNA	FBgn0040506
2L	12947179	12947180	intergenic	.
2L	12952401	12952402	intergenic	.
2L	12957935	12957936	intergenic	.
2L	12972399	12972400	intergenic	.
2L	12973413	12973414	intergenic	.
2L	12999518	12999519	intron,mRNA	FBgn0032465
2L	13004260	13004261	upstream	.
2L	13034016	13034017	intron,mRNA	FBgn0262160
2L	13039090	13039091	intron,mRNA	FBgn0262160
2L	13039349	13039350	intron,mRNA	FBgn0262160
2L	13039372	13039373	intron,mRNA	FBgn0262160
2L	13049396	13049397	intron,mRNA	FBgn0262160
2L	13049397	13049398	intron,mRNA	FBgn0262160
2L	13057661	13057662	intron,mRNA	FBgn0262160
2L	13066754	13066755	intergenic	.
2L	13082897	13082898	intergenic	.
2L	13082898	13082899	intergenic	.
2L	13082900	13082901	intergenic	.
2L	13091520	13091521	intergenic	.
2L	13108590	13108591	CDS,exon,mRNA	FBgn0032470
2L	13108637	13108638	intron,mRNA	FBgn0032470
2L	13111777	13111778	intergenic	.
2L	13118717	13118718	intergenic	.
2L	13120870	13120871	intergenic	.
2L	13130958	13130959	CDS,exon,mRNA	FBgn0032471
2L	13131935	13131936	CDS,exon,mRNA	FBgn0032471
2L	13135274	13135275	intergenic	.
2L	13135908	13135909	intergenic	.
2L	13138847	13138848	intergenic	.
2L	13142258	13142259	intergenic	.
2L	13142354	13142355	intergenic	.
2L	13142355	13142356	intergenic	.
2L	13150357	13150358	intergenic	.
2L	13153765	13153766	intergenic	.
2L	13156495	13156496	intergenic	.
2L	13158171	13158172	intergenic	.
2L	13158184	13158185	intergenic	.
2L	13166042	13166043	CDS,exon,five_prime_UTR,mRNA	FBgn0032474,FBgn0024291
2L	13168667	13168668	exon,mRNA,three_prime_UTR	FBgn0024291
2L	13172585	13172586	intron,mRNA	FBgn0032475
2L	13188908	13188909	CDS,exon,mRNA	FBgn0032479
2L	13198311	13198312	intron,mRNA	FBgn0032481
2L	13204635	13204636	intron,mRNA	FBgn0032482
2L	13206084	13206085	intron,mRNA	FBgn0032482
2L	13209870	13209871	intron,mRNA	FBgn0032482
2L	13244346	13244347	exon,intron	FBgn0266869
2L	13244898	13244899	exon	FBgn0003935
2L	13244990	13244991	upstream	.
2L	13247197	13247198	intron,mRNA	FBgn0032495
2L	13263380	13263381	intron,mRNA	FBgn0264894
2L	13264196	13264197	intron,mRNA	FBgn0264894
2L	13295702	13295703	exon,five_prime_UTR,intron,mRNA	FBgn0051729
2L	13295703	13295704	exon,five_prime_UTR,intron,mRNA	FBgn0051729
2L	13297618	13297619	CDS,exon,five_prime_UTR,mRNA	FBgn0051729
2L	13325804	13325805	intron,mRNA	.
2L	13329438	13329439	intron,mRNA	FBgn0264308
2L	13329439	13329440	intron,mRNA	FBgn0264308
2L	13329468	13329469	intron,mRNA	FBgn0264308
2L	13340289	13340290	intergenic	.
2L	13373632	13373633	CDS,exon,mRNA	FBgn0032512
2L	13374390	13374391	exon,five_prime_UTR,mRNA	FBgn0032513
2L	13400930	13400931	intron,mRNA	FBgn0032521
2L	13527576	13527577	intron,mRNA	FBgn0023407
2L	13530423	13530424	intron,mRNA	FBgn0053642,FBgn0023407
2L	13551775	13551776	intron,mRNA	FBgn0259984
2L	13553275	13553276	intron,mRNA	FBgn0259984
2L	13553358	13553359	intron,mRNA	FBgn0259984
2L	13565443	13565444	intron,mRNA	FBgn0259984
2L	13568970	13568971	intron,mRNA	FBgn0259984
2L	13571173	13571174	intron,mRNA	FBgn0259984
2L	13571820	13571821	intron,mRNA	FBgn0259984
2L	13572168	13572169	intron,mRNA	FBgn0259984
2L	13573856	13573857	intron,mRNA	FBgn0259984
2L	13573857	13573858	intron,mRNA	FBgn0259984
2L	13576673	13576674	intron,mRNA	FBgn0259984
2L	13580033	13580034	intron,mRNA	FBgn0259984
2L	13581042	13581043	intron,mRNA	FBgn0259984
2L	13587539	13587540	intron,mRNA	FBgn0259984
2L	13606650	13606651	intron,mRNA	FBgn0259984
2L	13613966	13613967	intron,mRNA	FBgn0259984
2L	13625929	13625930	intron,mRNA	FBgn0259984
2L	13640916	13640917	intron,mRNA	FBgn0028546
2L	13641327	13641328	intron,mRNA	FBgn0028546
2L	13641378	13641379	intron,mRNA	FBgn0028546
2L	13641563	13641564	intron,mRNA	FBgn0028546
2L	13641587	13641588	intron,mRNA	FBgn0028546
2L	13641705	13641706	intron,mRNA	FBgn0028546
2L	13642039	13642040	exon,five_prime_UTR,mRNA	FBgn0028546
2L	13642040	13642041	exon,five_prime_UTR,mRNA	FBgn0028546
2L	13643347	13643348	intergenic	.
2L	13643374	13643375	intergenic	.
2L	13649608	13649609	intergenic	.
2L	13649793	13649794	intergenic	.
2L	13654512	13654513	intergenic	.
2L	13658656	13658657	intergenic	.
2L	13658841	13658842	intergenic	.
2L	13663560	13663561	intergenic	.
2L	13664974	13664975	intergenic	.
2L	13682317	13682318	intron,mRNA	FBgn0051814
2L	13697165	13697166	intron,mRNA	FBgn0051814
2L	13710641	13710642	intron,mRNA	FBgn0051814
2L	13710734	13710735	intron,mRNA	FBgn0051814
2L	13739361	13739362	intergenic	.
2L	13739363	13739364	intergenic	.
2L	13741107	13741108	intergenic	.
2L	13742292	13742293	intergenic	.
2L	13744404	13744405	intergenic	.
2L	13747280	13747281	exon,intron,mRNA	FBgn0266140,FBgn0267573,FBgn0028541
2L	13841981	13841982	intron,mRNA	FBgn0028509
2L	13863183	13863184	intron,mRNA	FBgn0028509
2L	13874191	13874192	intron,mRNA	FBgn0028509
2L	13890748	13890749	intron,mRNA	FBgn0028509
2L	13903892	13903893	CDS,exon,mRNA	FBgn0019890
2L	13904604	13904605	exon,five_prime_UTR,mRNA	FBgn0019890
2L	13904719	13904720	upstream	.
2L	13906568	13906569	exon,five_prime_UTR,mRNA	FBgn0012037
2L	13911210	13911211	CDS,exon,mRNA	FBgn0032535
2L	13918119	13918120	intron,mRNA	FBgn0032536
2L	13927005	13927006	intron,mRNA	FBgn0032536
2L	13927295	13927296	intron,mRNA	FBgn0032536
2L	13928712	13928713	intron,mRNA	FBgn0032536
2L	13928848	13928849	intron,mRNA	FBgn0032536
2L	13931775	13931776	intron,mRNA	FBgn0032536
2L	13938444	13938445	intron,mRNA	FBgn0032536
2L	13940211	13940212	intron,mRNA	FBgn0032536
2L	13940472	13940473	intron,mRNA	FBgn0032536
2L	13948152	13948153	intron,mRNA	FBgn0032536
2L	13948154	13948155	intron,mRNA	FBgn0032536
2L	13952048	13952049	intron,mRNA	FBgn0032536
2L	13955752	13955753	exon,mRNA,three_prime_UTR	FBgn0032536
2L	13956915	13956916	intergenic	.
2L	13956964	13956965	intergenic	.
2L	13958563	13958564	intron,mRNA	FBgn0261514
2L	13958766	13958767	intron,mRNA	FBgn0261514
2L	13991988	13991989	intron,mRNA	FBgn0003255
2L	13998185	13998186	intron,mRNA	FBgn0003255
2L	14011960	14011961	intergenic	.
2L	14034011	14034012	exon	FBgn0266822
2L	14035886	14035887	exon	FBgn0266822
2L	14035887	14035888	exon	FBgn0266822
2L	14037934	14037935	exon	FBgn0266822
2L	14043363	14043364	intron,mRNA	FBgn0028875
2L	14051129	14051130	intron,mRNA	FBgn0028875
2L	14060334	14060335	intron,mRNA	FBgn0028875
2L	14065159	14065160	intron,mRNA	FBgn0028875
2L	14065488	14065489	intron,mRNA	FBgn0028875
2L	14078372	14078373	intron,mRNA	FBgn0028875
2L	14078482	14078483	intron,mRNA	FBgn0028875
2L	14085194	14085195	intron,mRNA	FBgn0028875
2L	14110236	14110237	CDS,exon,intron,mRNA	FBgn0051769,FBgn0283651
2L	14110668	14110669	CDS,exon,intron,mRNA	FBgn0051769,FBgn0283651
2L	14170675	14170676	intron,mRNA	FBgn0263038
2L	14170687	14170688	intron,mRNA	FBgn0263038
2L	14182698	14182699	intergenic	.
2L	14184237	14184238	intergenic	.
2L	14189576	14189577	intron,mRNA	FBgn0016930
2L	14210138	14210139	intron,mRNA	FBgn0016930
2L	14261187	14261188	intergenic	.
2L	14296198	14296199	intron,mRNA	FBgn0261563
2L	14296828	14296829	intron,mRNA	FBgn0261563
2L	14299759	14299760	intron,mRNA	FBgn0261563
2L	14312430	14312431	intron,mRNA	FBgn0261563
2L	14320953	14320954	intron,mRNA	FBgn0261563
2L	14322591	14322592	CDS,exon,mRNA	FBgn0261563
2L	14323290	14323291	CDS,exon,mRNA	FBgn0261563
2L	14323403	14323404	CDS,exon,mRNA	FBgn0261563
2L	14324061	14324062	CDS,exon,mRNA	FBgn0261563
2L	14324653	14324654	intron,mRNA	FBgn0261563
2L	14325153	14325154	CDS,exon,mRNA	FBgn0261563
2L	14330325	14330326	intron,mRNA	FBgn0261529
2L	14331364	14331365	CDS,exon,mRNA	FBgn0261529
2L	14333619	14333620	CDS,exon,mRNA	FBgn0261529
2L	14336055	14336056	intron,mRNA	FBgn0028916
2L	14340097	14340098	intron,mRNA	FBgn0028916
2L	14341270	14341271	intron,mRNA	FBgn0028916
2L	14342133	14342134	exon,five_prime_UTR,intron,mRNA	FBgn0028916
2L	14356710	14356711	exon,intron,mRNA	FBgn0015791,FBgn0266145
2L	14356711	14356712	exon,intron,mRNA	FBgn0015791,FBgn0266145
2L	14366729	14366730	exon,mRNA,three_prime_UTR	FBgn0015546
2L	14366760	14366761	exon,mRNA,three_prime_UTR	FBgn0015546
2L	14367536	14367537	intergenic	.
2L	14367537	14367538	intergenic	.
2L	14369209	14369210	intergenic	.
2L	14370077	14370078	intergenic	.
2L	14381707	14381708	intergenic	.
2L	14382284	14382285	intergenic	.
2L	14387764	14387765	intergenic	.
2L	14394146	14394147	intron,mRNA	FBgn0004858
2L	14395651	14395652	intron,mRNA	FBgn0004858
2L	14395652	14395653	intron,mRNA	FBgn0004858
2L	14395653	14395654	intron,mRNA	FBgn0004858
2L	14395654	14395655	intron,mRNA	FBgn0004858
2L	14414893	14414894	intergenic	.
2L	14414894	14414895	intergenic	.
2L	14414895	14414896	intergenic	.
2L	14416812	14416813	exon,mRNA,three_prime_UTR	FBgn0264810
2L	14417570	14417571	upstream	.
2L	14418269	14418270	intergenic	.
2L	14422286	14422287	intergenic	.
2L	14426083	14426084	intergenic	.
2L	14426174	14426175	intergenic	.
2L	14426213	14426214	intergenic	.
2L	14437212	14437213	intergenic	.
2L	14457539	14457540	intergenic	.
2L	14458347	14458348	intergenic	.
2L	14465644	14465645	TE,intergenic	.
2L	14465645	14465646	TE,intergenic	.
2L	14487715	14487716	intergenic	.
2L	14506987	14506988	intergenic	.
2L	14517001	14517002	intergenic	.
2L	14520359	14520360	intergenic	.
2L	14520435	14520436	intergenic	.
2L	14520568	14520569	intergenic	.
2L	14526408	14526409	intergenic	.
2L	14526960	14526961	intergenic	.
2L	14534123	14534124	intergenic	.
2L	14534124	14534125	intergenic	.
2L	14534125	14534126	intergenic	.
2L	14538246	14538247	intergenic	.
2L	14576398	14576399	upstream	.
2L	14584666	14584667	intergenic	.
2L	14595798	14595799	intergenic	.
2L	14598934	14598935	intergenic	.
2L	14605003	14605004	CDS,exon,mRNA	FBgn0003016
2L	14617267	14617268	exon,five_prime_UTR,intron,mRNA,three_prime_UTR	FBgn0003016
2L	14617281	14617282	exon,five_prime_UTR,intron,mRNA,three_prime_UTR	FBgn0003016
2L	14619737	14619738	intron,mRNA	FBgn0003016
2L	14619738	14619739	intron,mRNA	FBgn0003016
2L	14619739	14619740	intron,mRNA	FBgn0003016
2L	14620319	14620320	intron,mRNA	FBgn0003016
2L	14628216	14628217	intron,mRNA	FBgn0003016
2L	14628256	14628257	intron,mRNA	FBgn0003016
2L	14636712	14636713	intron,mRNA	FBgn0003016
2L	14642123	14642124	intron,mRNA	FBgn0003016
2L	14663202	14663203	intron,mRNA	FBgn0003016
2L	14664144	14664145	intron,mRNA	FBgn0003016
2L	14667205	14667206	intron,mRNA	FBgn0003016
2L	14669551	14669552	intron,mRNA	FBgn0003016
2L	14673704	14673705	intron,mRNA	FBgn0003016
2L	14675898	14675899	intron,mRNA	FBgn0003016
2L	14680699	14680700	intron,mRNA	FBgn0003016
2L	14686238	14686239	intron,mRNA	FBgn0003016
2L	14695500	14695501	intergenic	.
2L	14695809	14695810	intergenic	.
2L	14699048	14699049	intergenic	.
2L	14699276	14699277	intergenic	.
2L	14702270	14702271	intergenic	.
2L	14710039	14710040	intergenic	.
2L	14716315	14716316	intergenic	.
2L	14724572	14724573	intergenic	.
2L	14746738	14746739	intergenic	.
2L	14747093	14747094	upstream	.
2L	14747094	14747095	upstream	.
2L	14747096	14747097	upstream	.
2L	14747715	14747716	intergenic	.
2L	14753873	14753874	intergenic	.
2L	14758409	14758410	intergenic	.
2L	14822926	14822927	intergenic	.
2L	14833683	14833684	intergenic	.
2L	14833684	14833685	intergenic	.
2L	14872902	14872903	intergenic	.
2L	14939933	14939934	intron,mRNA	FBgn0259213
2L	14957677	14957678	intron,mRNA	FBgn0259213
2L	14967401	14967402	intron,mRNA	FBgn0259213
2L	14982423	14982424	intron,mRNA	FBgn0086711
2L	14999143	14999144	intergenic	.
2L	14999842	14999843	intergenic	.
2L	15003824	15003825	intergenic	.
2L	15026354	15026355	intron,mRNA	FBgn0260446
2L	15026355	15026356	intron,mRNA	FBgn0260446
2L	15026370	15026371	intron,mRNA	FBgn0260446
2L	15027783	15027784	CDS,exon,intron,mRNA	FBgn0053310,FBgn0260446
2L	15037255	15037256	CDS,exon,mRNA,three_prime_UTR	FBgn0041713,FBgn0001977
2L	15058107	15058108	upstream	.
2L	15075312	15075313	exon,five_prime_UTR,intron,mRNA	FBgn0028879
2L	15082958	15082959	intron,mRNA	FBgn0028879
2L	15108778	15108779	intergenic	.
2L	15147827	15147828	intergenic	.
2L	15151583	15151584	intergenic	.
2L	15172529	15172530	intron,mRNA	FBgn0028888
2L	15175279	15175280	intron,mRNA	FBgn0028888
2L	15175280	15175281	intron,mRNA	FBgn0028888
2L	15176564	15176565	intron,mRNA	FBgn0028888
2L	15176565	15176566	intron,mRNA	FBgn0028888
2L	15184204	15184205	intron,mRNA	FBgn0028888
2L	15188892	15188893	intron,mRNA	FBgn0028888
2L	15189411	15189412	intron,mRNA	FBgn0028888
2L	15202856	15202857	intron	FBgn0263089
2L	15204066	15204067	intergenic	.
2L	15209174	15209175	intergenic	.
2L	15219238	15219239	intergenic	.
2L	15219240	15219241	intergenic	.
2L	15255467	15255468	CDS,exon,mRNA	FBgn0283467
2L	15269662	15269663	CDS,exon,intron,mRNA	FBgn0261268
2L	15283371	15283372	intergenic	.
2L	15300543	15300544	intergenic	.
2L	15300544	15300545	intergenic	.
2L	15316588	15316589	intergenic	.
2L	15350956	15350957	intergenic	.
2L	15350966	15350967	intergenic	.
2L	15350971	15350972	intergenic	.
2L	15351075	15351076	intergenic	.
2L	15374932	15374933	intergenic	.
2L	15374933	15374934	intergenic	.
2L	15386323	15386324	intergenic	.
2L	15405741	15405742	intergenic	.
2L	15433406	15433407	exon,five_prime_UTR,mRNA	FBgn0028892
2L	15437637	15437638	intergenic	.
2L	15443947	15443948	intergenic	.
2L	15457787	15457788	intergenic	.
2L	15464397	15464398	intergenic	.
2L	15467161	15467162	intergenic	.
2L	15472229	15472230	intergenic	.
2L	15488691	15488692	intergenic	.
2L	15501752	15501753	intron,mRNA	FBgn0002524
2L	15504445	15504446	exon,mRNA,three_prime_UTR	FBgn0002524
2L	15504919	15504920	exon,mRNA,three_prime_UTR	FBgn0002524
2L	15526013	15526014	intergenic	.
2L	15534201	15534202	intergenic	.
2L	15563133	15563134	intron,mRNA	FBgn0028370
2L	15575377	15575378	intron,mRNA	FBgn0028370
2L	15597914	15597915	intergenic	.
2L	15600387	15600388	intergenic	.
2L	15616655	15616656	upstream	.
2L	15634265	15634266	exon,mRNA,three_prime_UTR	FBgn0028518
2L	15737306	15737307	intron,mRNA	FBgn0010382
2L	15738438	15738439	intron,mRNA	FBgn0010382
2L	15741234	15741235	intron,mRNA	FBgn0010382
2L	15741238	15741239	intron,mRNA	FBgn0010382
2L	15741267	15741268	intron,mRNA	FBgn0010382
2L	15744873	15744874	intron,mRNA	FBgn0010382
2L	15744875	15744876	intron,mRNA	FBgn0010382
2L	15751508	15751509	upstream	.
2L	15751539	15751540	upstream	.
2L	15751631	15751632	exon	FBgn0003936
2L	15770185	15770186	CDS,exon,mRNA	FBgn0041627
2L	15770619	15770620	CDS,exon,mRNA	FBgn0041627
2L	15771013	15771014	intron,mRNA	FBgn0041627
2L	15774696	15774697	intergenic	.
2L	15779093	15779094	intergenic	.
2L	15780894	15780895	intergenic	.
2L	15782204	15782205	intergenic	.
2L	15782205	15782206	intergenic	.
2L	15783511	15783512	intergenic	.
2L	15798111	15798112	intergenic	.
2L	15798112	15798113	intergenic	.
2L	15823266	15823267	upstream	.
2L	15826838	15826839	intergenic	.
2L	15826839	15826840	intergenic	.
2L	15835965	15835966	upstream	.
2L	15835967	15835968	upstream	.
2L	15836693	15836694	intergenic	.
2L	15836694	15836695	intergenic	.
2L	15856598	15856599	intergenic	.
2L	15856643	15856644	intergenic	.
2L	15859272	15859273	intergenic	.
2L	15868463	15868464	intergenic	.
2L	15868760	15868761	intergenic	.
2L	15868809	15868810	intergenic	.
2L	15868810	15868811	intergenic	.
2L	15868812	15868813	intergenic	.
2L	15880243	15880244	upstream	.
2L	15881928	15881929	intergenic	.
2L	15886184	15886185	intergenic	.
2L	15906234	15906235	intron,mRNA	FBgn0028645
2L	15907806	15907807	intron,mRNA	FBgn0028645
2L	15929960	15929961	intron,mRNA	FBgn0028645
2L	15945675	15945676	intron,mRNA	FBgn0028645
2L	15945677	15945678	intron,mRNA	FBgn0028645
2L	15959381	15959382	exon,intron,mRNA,three_prime_UTR	FBgn0028645,FBgn0028856
2L	16000124	16000125	upstream	.
2L	16008521	16008522	intron,mRNA	FBgn0028644
2L	16012178	16012179	intron,mRNA	FBgn0028644
2L	16012179	16012180	intron,mRNA	FBgn0028644
2L	16027732	16027733	intron,mRNA	FBgn0028644
2L	16054441	16054442	intron,mRNA	FBgn0013433
2L	16081881	16081882	intergenic	.
2L	16081945	16081946	intergenic	.
2L	16083449	16083450	intergenic	.
2L	16088063	16088064	intergenic	.
2L	16105940	16105941	intergenic	.
2L	16129578	16129579	intergenic	.
2L	16140491	16140492	intergenic	.
2L	16141146	16141147	intergenic	.
2L	16147527	16147528	intergenic	.
2L	16166250	16166251	exon,five_prime_UTR,mRNA	FBgn0001991
2L	16168982	16168983	intron,mRNA	FBgn0001991
2L	16168983	16168984	intron,mRNA	FBgn0001991
2L	16190126	16190127	exon,mRNA,three_prime_UTR	FBgn0001991
2L	16198398	16198399	intergenic	.
2L	16220881	16220882	intergenic	.
2L	16230297	16230298	intergenic	.
2L	16230300	16230301	intergenic	.
2L	16230415	16230416	intergenic	.
2L	16230842	16230843	intergenic	.
2L	16230992	16230993	upstream	.
2L	16231017	16231018	upstream	.
2L	16233209	16233210	intron,mRNA	FBgn0261999
2L	16245272	16245273	CDS,exon,mRNA	FBgn0262000
2L	16245955	16245956	exon,three_prime_UTR	.
2L	16254781	16254782	intron	.
2L	16255690	16255691	intron	.
2L	16272742	16272743	intron,mRNA	FBgn0001994
2L	16279230	16279231	intron,mRNA	FBgn0001994
2L	16293557	16293558	exon	FBgn0266204
2L	16313682	16313683	intron,mRNA	FBgn0000250
2L	16314315	16314316	exon,intron,mRNA,three_prime_UTR	FBgn0000250
2L	16314745	16314746	intron,mRNA	FBgn0000250
2L	16319318	16319319	intron,mRNA	FBgn0000250
2L	16319449	16319450	intron,mRNA	FBgn0000250
2L	16323529	16323530	intron,mRNA	FBgn0000250
2L	16323531	16323532	intron,mRNA	FBgn0000250
2L	16325417	16325418	exon,five_prime_UTR,intron,mRNA	FBgn0000250
2L	16334725	16334726	CDS,exon,mRNA	FBgn0028899
2L	16336315	16336316	CDS,exon,mRNA	FBgn0028899
2L	16349719	16349720	intron,mRNA	FBgn0000307,FBgn0087041
2L	16351096	16351097	intron,mRNA	FBgn0000307,FBgn0087041
2L	16353227	16353228	CDS,exon,mRNA	FBgn0028506
2L	16353942	16353943	exon,mRNA,three_prime_UTR	FBgn0028506
2L	16356692	16356693	exon,five_prime_UTR,mRNA	FBgn0025678
2L	16356813	16356814	upstream	.
2L	16357131	16357132	upstream	.
2L	16357182	16357183	upstream	.
2L	16357235	16357236	intergenic	.
2L	16358587	16358588	intergenic	.
2L	16361267	16361268	intergenic	.
2L	16361356	16361357	intergenic	.
2L	16365550	16365551	upstream	.
2L	16368041	16368042	intergenic	.
2L	16373795	16373796	intergenic	.
2L	16386074	16386075	intergenic	.
2L	16390667	16390668	intergenic	.
2L	16432559	16432560	intron,mRNA	FBgn0028523
2L	16432560	16432561	intron,mRNA	FBgn0028523
2L	16432652	16432653	intron,mRNA	FBgn0028523
2L	16434254	16434255	intron,mRNA	FBgn0028523
2L	16437343	16437344	intron,mRNA	FBgn0028523
2L	16442504	16442505	intron,mRNA	FBgn0028523
2L	16442505	16442506	intron,mRNA	FBgn0028523
2L	16447106	16447107	intron,mRNA	FBgn0028523
2L	16460442	16460443	intergenic	.
2L	16463253	16463254	intergenic	.
2L	16490141	16490142	exon,mRNA,three_prime_UTR	FBgn0032585
2L	16490570	16490571	intron	FBgn0266329
2L	16490571	16490572	intron	FBgn0266329
2L	16495088	16495089	intron,mRNA	FBgn0032586
2L	16506195	16506196	CDS,exon,mRNA	FBgn0032586
2L	16566346	16566347	intron,mRNA	FBgn0259735
2L	16566945	16566946	intron,mRNA	FBgn0259735
2L	16587556	16587557	intron,mRNA	FBgn0259735
2L	16595093	16595094	intron,mRNA	FBgn0259735
2L	16596388	16596389	intron,mRNA	FBgn0259735
2L	16598246	16598247	intron,mRNA	FBgn0259735
2L	16600350	16600351	intron,mRNA	FBgn0259735
2L	16612394	16612395	intron,mRNA	FBgn0259735
2L	16612397	16612398	intron,mRNA	FBgn0259735
2L	16624987	16624988	intron,mRNA	FBgn0259735
2L	16633285	16633286	intron,mRNA	FBgn0259735
2L	16633297	16633298	intron,mRNA	FBgn0259735
2L	16644133	16644134	intron,mRNA	FBgn0259735
2L	16655207	16655208	intron,mRNA	FBgn0259735
2L	16671647	16671648	intron,mRNA	FBgn0032593
2L	16681430	16681431	CDS,exon,intron,mRNA	FBgn0267347,FBgn0261278
2L	16681431	16681432	CDS,exon,intron,mRNA	FBgn0267347,FBgn0261278
2L	16698670	16698671	intron,mRNA	FBgn0261278
2L	16701969	16701970	exon	FBgn0263745
2L	16701971	16701972	exon	FBgn0263745
2L	16718939	16718940	intron,mRNA	FBgn0086907
2L	16718962	16718963	intron,mRNA	FBgn0086907
2L	16722850	16722851	intergenic	.
2L	16760157	16760158	exon,five_prime_UTR,mRNA	FBgn0032602
2L	16767256	16767257	intron,mRNA	FBgn0264695
2L	16774081	16774082	intron,mRNA	FBgn0264695
2L	16778451	16778452	CDS,exon,intron,mRNA	FBgn0264695
2L	16806025	16806026	intron,mRNA	FBgn0032609,FBgn0086673
2L	16808238	16808239	intron,mRNA	FBgn0032609,FBgn0086673
2L	16809261	16809262	intron,mRNA	FBgn0032609,FBgn0086673
2L	16821109	16821110	intron,mRNA	FBgn0004797
2L	16821110	16821111	intron,mRNA	FBgn0004797
2L	16838903	16838904	intron	.
2L	16840598	16840599	intron	.
2L	16841914	16841915	intergenic	.
2L	16843426	16843427	intron,mRNA	FBgn0032614
2L	16847541	16847542	exon,five_prime_UTR,intron,mRNA	FBgn0032614
2L	16848045	16848046	exon,five_prime_UTR,intron,mRNA	FBgn0032614
2L	16851778	16851779	intron,mRNA	FBgn0051810
2L	16853252	16853253	intergenic	.
2L	16853900	16853901	intron,mRNA	FBgn0051809
2L	16857104	16857105	TE,intron,mRNA	FBgn0051809
2L	16861534	16861535	intron	FBgn0264440
2L	16861536	16861537	intron	FBgn0264440
2L	16864745	16864746	intergenic	.
2L	16864754	16864755	intergenic	.
2L	16864911	16864912	intergenic	.
2L	16884467	16884468	intron	.
2L	16902908	16902909	intron,mRNA	FBgn0261671
2L	16997156	16997157	intergenic	.
2L	16997509	16997510	intergenic	.
2L	16997510	16997511	intergenic	.
2L	16998146	16998147	upstream	.
2L	16998149	16998150	upstream	.
2L	17011287	17011288	intergenic	.
2L	17019774	17019775	intergenic	.
2L	17023591	17023592	intergenic	.
2L	17023592	17023593	intergenic	.
2L	17023593	17023594	intergenic	.
2L	17025846	17025847	intergenic	.
2L	17026085	17026086	intergenic	.
2L	17027021	17027022	intergenic	.
2L	17027743	17027744	intergenic	.
2L	17035837	17035838	intergenic	.
2L	17063473	17063474	intergenic	.
2L	17138451	17138452	intron	.
2L	17145813	17145814	TE,intron	.
2L	17151205	17151206	TE,intron	.
2L	17151206	17151207	TE,intron	.
2L	17152986	17152987	intron	.
2L	17166518	17166519	intron	.
2L	17168082	17168083	intron	.
2L	17178952	17178953	CDS,exon,mRNA	FBgn0045486
2L	17184950	17184951	intergenic	.
2L	17192833	17192834	intron,mRNA	FBgn0032629
2L	17208207	17208208	intron,mRNA	FBgn0032629
2L	17210708	17210709	intron,mRNA	FBgn0032629
2L	17217177	17217178	intron,mRNA	FBgn0032629
2L	17217178	17217179	intron,mRNA	FBgn0032629
2L	17221745	17221746	intron,mRNA	FBgn0032629
2L	17243653	17243654	intron,mRNA	FBgn0032629
2L	17255537	17255538	intron,mRNA	FBgn0032629
2L	17258785	17258786	intron,mRNA	FBgn0032629
2L	17259601	17259602	intron,mRNA	FBgn0032629
2L	17281882	17281883	intergenic	.
2L	17306345	17306346	intergenic	.
2L	17310352	17310353	intergenic	.
2L	17328405	17328406	intergenic	.
2L	17338793	17338794	intergenic	.
2L	17344092	17344093	intergenic	.
2L	17351337	17351338	intergenic	.
2L	17354833	17354834	upstream	.
2L	17361828	17361829	intergenic	.
2L	17376447	17376448	intron,mRNA	FBgn0032633
2L	17376448	17376449	intron,mRNA	FBgn0032633
2L	17390089	17390090	intron,mRNA	FBgn0020503
2L	17393661	17393662	intron,mRNA	FBgn0020503
2L	17396164	17396165	intron,mRNA	FBgn0020503
2L	17405636	17405637	CDS,exon,mRNA	FBgn0020503
2L	17414283	17414284	CDS,exon,mRNA	FBgn0011274
2L	17414559	17414560	intron,mRNA	FBgn0011274
2L	17414560	17414561	intron,mRNA	FBgn0011274
2L	17421177	17421178	intron,mRNA	FBgn0011274
2L	17421735	17421736	intron,mRNA	FBgn0011274
2L	17432696	17432697	intron,mRNA	FBgn0011274
2L	17468147	17468148	intron,mRNA	FBgn0000183
2L	17495548	17495549	intron,mRNA	FBgn0003187
2L	17495549	17495550	intron,mRNA	FBgn0003187
2L	17502446	17502447	intron,mRNA	FBgn0013810
2L	17504988	17504989	CDS,exon,mRNA	FBgn0013810
2L	17521292	17521293	CDS,exon,intron,mRNA	FBgn0032647,FBgn0013810
2L	17540909	17540910	intergenic	.
2L	17545540	17545541	intergenic	.
2L	17547399	17547400	exon	FBgn0267261
2L	17551504	17551505	intergenic	.
2L	17560034	17560035	intergenic	.
2L	17578185	17578186	intergenic	.
2L	17587311	17587312	intergenic	.
2L	17614702	17614703	intergenic	.
2L	17640389	17640390	intergenic	.
2L	17670747	17670748	intron,mRNA	FBgn0015609
2L	17696471	17696472	intron,mRNA	FBgn0015609
2L	17709420	17709421	intron,mRNA	FBgn0015609
2L	17729342	17729343	intron,mRNA	FBgn0015609
2L	17729343	17729344	intron,mRNA	FBgn0015609
2L	17756192	17756193	intron,mRNA	FBgn0015609
2L	17766073	17766074	intron,mRNA	FBgn0015609
2L	17808610	17808611	intron,mRNA	FBgn0262018
2L	17827534	17827535	exon,five_prime_UTR,mRNA	FBgn0262018
2L	17827535	17827536	exon,five_prime_UTR,mRNA	FBgn0262018
2L	17859445	17859446	intron,mRNA	FBgn0262018
2L	17866612	17866613	intron,mRNA	FBgn0262018
2L	17958123	17958124	intergenic	.
2L	17969039	17969040	CDS,exon,intron,mRNA	FBgn0023096,FBgn0032656
2L	17995134	17995135	intergenic	.
2L	17999897	17999898	intergenic	.
2L	18013121	18013122	intron,mRNA	FBgn0243486
2L	18013122	18013123	intron,mRNA	FBgn0243486
2L	18016895	18016896	intron,mRNA	FBgn0243486
2L	18021202	18021203	intron,mRNA	FBgn0243486
2L	18070201	18070202	exon,mRNA,three_prime_UTR	FBgn0243486
2L	18075462	18075463	intergenic	.
2L	18096606	18096607	exon,five_prime_UTR,mRNA	FBgn0032664
2L	18116002	18116003	intergenic	.
2L	18119534	18119535	upstream	.
2L	18119537	18119538	upstream	.
2L	18126282	18126283	intron,mRNA	FBgn0032666
2L	18199716	18199717	intron,mRNA	FBgn0261804
2L	18214224	18214225	intron,mRNA	FBgn0261804
2L	18215125	18215126	intron,mRNA	FBgn0261804
2L	18232007	18232008	intron,mRNA	FBgn0261804
2L	18241233	18241234	intron,mRNA	FBgn0261804
2L	18250731	18250732	intron,mRNA	FBgn0261804
2L	18257476	18257477	intron,mRNA	FBgn0261804
2L	18257477	18257478	intron,mRNA	FBgn0261804
2L	18277609	18277610	intergenic	.
2L	18278607	18278608	intergenic	.
2L	18281756	18281757	intergenic	.
2L	18288863	18288864	intergenic	.
2L	18297805	18297806	intergenic	.
2L	18418232	18418233	intergenic	.
2L	18472035	18472036	exon	FBgn0262406,FBgn0263049
2L	18473566	18473567	intron,mRNA	FBgn0032681
2L	18479786	18479787	intron,mRNA	FBgn0032681
2L	18488590	18488591	CDS,exon,mRNA	FBgn0032683
2L	18502837	18502838	intron,mRNA	FBgn0032683
2L	18534121	18534122	CDS,exon,mRNA,three_prime_UTR	FBgn0085370
2L	18555260	18555261	intron,mRNA	FBgn0085370
2L	18558478	18558479	intron,mRNA	FBgn0085370
2L	18568294	18568295	intron,mRNA	FBgn0085370
2L	18570022	18570023	intron,mRNA	FBgn0085370
2L	18588469	18588470	intron,mRNA	FBgn0085370
2L	18588470	18588471	intron,mRNA	FBgn0085370
2L	18599209	18599210	intergenic	.
2L	18602412	18602413	CDS,exon,mRNA	FBgn0032689
2L	18604169	18604170	intron,mRNA	FBgn0032689
2L	18606127	18606128	intron,mRNA	FBgn0051789
2L	18606128	18606129	intron,mRNA	FBgn0051789
2L	18606129	18606130	intron,mRNA	FBgn0051789
2L	18612517	18612518	upstream	.
2L	18621954	18621955	intron,mRNA	FBgn0032694
2L	18630847	18630848	intron,mRNA	FBgn0032694
2L	18631131	18631132	intron,mRNA	FBgn0032694
2L	18686357	18686358	CDS,exon,mRNA	FBgn0005617
2L	18689147	18689148	TE,upstream	.
2L	18689148	18689149	TE,upstream	.
2L	18730332	18730333	intron,mRNA	FBgn0032707
2L	18730802	18730803	intron,mRNA	FBgn0032707
2L	18736299	18736300	intergenic	.
2L	18736465	18736466	intergenic	.
2L	18736494	18736495	intergenic	.
2L	18751782	18751783	intergenic	.
2L	18752807	18752808	intergenic	.
2L	18768350	18768351	intron,mRNA	FBgn0045852
2L	18769878	18769879	intron,mRNA	FBgn0045852
2L	18821300	18821301	intron,mRNA	FBgn0027074
2L	18869908	18869909	intron,mRNA	FBgn0003896
2L	18918518	18918519	intron,mRNA	FBgn0032723
2L	18925923	18925924	intron,mRNA	FBgn0032723
2L	18945453	18945454	upstream	.
2L	18948335	18948336	intergenic	.
2L	18953908	18953909	intron,mRNA	FBgn0032726
2L	18954401	18954402	exon,five_prime_UTR,mRNA	FBgn0032726
2L	18957889	18957890	exon,mRNA,three_prime_UTR	FBgn0015772
2L	18957890	18957891	exon,mRNA,three_prime_UTR	FBgn0015772
2L	18968468	18968469	exon,five_prime_UTR,mRNA	FBgn0015772
2L	18968693	18968694	exon,five_prime_UTR,mRNA	FBgn0015772
2L	18970786	18970787	CDS,exon,mRNA	FBgn0032728
2L	19088501	19088502	intron,mRNA	FBgn0002023
2L	19110874	19110875	intron,mRNA	FBgn0000075
2L	19134076	19134077	exon,five_prime_UTR,intron,mRNA	FBgn0086447,FBgn0010300
2L	19134077	19134078	exon,five_prime_UTR,intron,mRNA	FBgn0086447,FBgn0010300
2L	19134078	19134079	exon,five_prime_UTR,intron,mRNA	FBgn0086447,FBgn0010300
2L	19135850	19135851	intron,mRNA	FBgn0010300
2L	19138289	19138290	intron,mRNA	FBgn0010300
2L	19143357	19143358	intron,mRNA	FBgn0010300
2L	19155291	19155292	intron,mRNA	FBgn0010300
[truncated: 8,050 more rows]

## Sheet: FlyAtlas enrichment scores
Gene ID	Brain:fly	Head:fly	Midgut:fly	Hindgut:fly	tubule:fly	Ovary:fly	Testis:fly	Acc:fly	l_tub:fly	l_fat.fly	tag:fly	car:fly
FBgn0035617	1.8	0.5	0.6	0.6	0.7	3.7	0.6	1.1	1.1	1.1	1.4	0.6
FBgn0003447	0.8	1.9	0.2	0.1	0.1	1.9	0.4	0.1	0.4	0.3	0.7	0.1
FBgn0036773	1.3	1.6	0.2	2	1	1.6	0.7	2.5	0.4	0.3	0.5	1
FBgn0020497	1.6	1.2	0.8	1.1	1.4	1.5	0.2	1	1.3	0.9	1.4	0.8
FBgn0033529	1.9	1.5	1.3	2.6	2	1.2	1.1	2.2	2.2	1.1	1.8	1.1
FBgn0034380	2	1	0.6	0.7	0.6	1.7	1.4	1.8	1	1	2.2	0.5
FBgn0021761	0.4	0.3	0.4	0.3	0.4	2.2	0.3	0.7	0.3	0.2	0.5	0.3
FBgn0032218	0.2	1.3	1.9	4.2	5.8	0.2	0.4	1.1	2	0.4	0.4	3.2
FBgn0034958	4.6	2.7	2.9	2.8	2.3	0.3	0.7	3.3	3	1.6	5	2.1
FBgn0034323	0.2	0.3	0.3	0.2	0.3	0.2	0.2	0.7	0.2	0.5	0.3	8.1
FBgn0031948	2.4	3.3	2.8	0.6	4.3	0.8	0.8	0.1	0.7	1.6	4.5	0.6
FBgn0040290	0.1	0.1	0.1	0.1	0.1	2	0.1	0.1	0.1	0.1	0.1	0.1
FBgn0010240	33.6	7.8	0.1	0.1	0.1	0.1	0.3	0.3	0.2	0.2	24.8	0.3
FBgn0022740	0.4	0.2	5.6	3.1	2.5	1.2	5	0.4	0.3	0.9	0.5	0.3
FBgn0052676	0.4	0.6	1.7	1.4	1.2	2.4	0.2	1.2	0.9	1	0.4	0.8
FBgn0030494	0.5	0.4	0.8	0.7	0.8	0.5	0.6	1.1	0.8	1.5	0.4	2.1
FBgn0032775	1.4	0.8	6.5	2.8	1.9	0.6	0.4	0.4	0.3	0.2	1.3	0.3
FBgn0030224	0.1	0.1	0.2	0.1	0.1	0.1	10.9	0.2	0.2	1.1	0.1	0.2
FBgn0035574	0.3	2.1	0.2	4.6	1	1.2	0.6	5.8	0.1	0.3	0.2	1
FBgn0038541	1.7	3.5	0.7	5	1.3	0.4	3.2	1.1	4	1.2	1.2	3.5
FBgn0011225	1.7	1.4	1.6	1.7	5.9	1.1	1.5	1.4	4.3	0.2	1.8	1
FBgn0011591	5.5	3.9	0.6	0.4	0.4	0.6	0.3	0.1	0.5	1.1	8.9	1.3
FBgn0000320	0.5	4.4	0.1	0	0.1	1.3	2.6	0	0.2	1	0.3	0.4
FBgn0023091	0.8	1	2.3	1.5	0.9	0.6	1.4	0.8	0.5	1.7	1.7	2.2
FBgn0050147	0.4	2.5	0.2	7.4	0.4	0.8	0.6	0.2	0	0.2	0.5	2
FBgn0050104	0.3	0.8	1.1	0.8	17.6	0.2	3.1	0.7	4.3	1.9	0.3	0.7
FBgn0034854	1.7	1.4	1.4	1.9	2.1	1.5	0.6	1.9	3.4	1.1	1.6	1.4
FBgn0038693	57.1	6.8	0.2	0.1	0.1	0.1	0.7	1.2	0.1	0.3	40.5	0.6
FBgn0051663	15.1	4.9	0.4	0.5	37.6	0.1	1	0.3	8.7	0.4	23.6	1.2
FBgn0043005	23.6	4.7	1.6	1.5	0.7	0.6	3.6	0.5	0.2	1.3	6.4	0.9
FBgn0029828	0.1	2.9	7.7	0.3	0.1	0	0	0	0	3.1	0.1	3.5
FBgn0004842	3.4	1.6	1	70.9	2.2	0.6	0.8	0.7	0.5	1.4	4.3	0.6
FBgn0030884	2.3	1.2	1.6	3.2	1.2	0.7	1.6	0.8	0.2	0.5	2.6	2.1
FBgn0003459	0.5	0.4	0.4	0.4	0.5	2.9	1.7	0.5	0.3	0.3	0.4	0.4
FBgn0039184	0	0	0	0.1	0.1	0	0	0.1	0.1	0.1	0.1	7.5
FBgn0038511	0.2	0.2	0.1	0.6	0.1	0	2.3	0.2	0.1	0.2	0.1	0.1
FBgn0024238	2.5	1.1	4.6	1.5	0.7	1.3	0.8	1	3.1	1.8	3.3	0.7
FBgn0031518	1.8	1.2	12.8	2.7	1	0.4	1	0.8	2	0.5	1.1	0.8
FBgn0032859	0.4	0.3	1.1	0.5	0.6	2	0.2	0.6	0.9	0.6	0.4	0.2
FBgn0022800	0.2	3.5	0.3	4.5	0.2	0.1	0.3	0.2	0.1	0.2	0.3	3.6
FBgn0040491	0.3	2.4	2.4	5.8	1.4	0.4	1	8.3	1.1	0.2	0.5	0.8
FBgn0004870	17.3	2.3	1.3	4.1	0.9	0.7	0.8	0.9	0.4	1.5	14	0.6
FBgn0038505	0.8	1.3	1.4	0.9	1.5	0.6	1	0.9	5.4	1.3	0.4	1.7
FBgn0004449	11.1	3	0.7	0.8	0.4	0.2	0.7	0.4	0.2	1.6	10.8	2.1
FBgn0040368	0	0	0	0	0	0	13.5	0.1	0	1.4	0	0
FBgn0041626	0.9	2.6	3.2	1.6	0.6	1	0.9	1.3	0.7	1.3	0.7	2
FBgn0016061	5	1.8	1.6	0.8	0.7	0.9	0.9	3.2	1.1	1.5	4.8	1.5
FBgn0033728	0.1	2.5	0	0.6	0	0	0	0	0	0	0.1	5.7
FBgn0029922	13.5	4.3	1	2.4	3	0.9	1.5	5.4	2	8.7	9.6	1.5
FBgn0035113	1.9	2.1	1.4	3.2	0.7	0.4	0.7	1.7	0.3	3	3.5	4.4
FBgn0014007	0.8	0.5	0.4	0.5	0.6	4.2	0.5	0.7	1.8	1	0.8	0.5
FBgn0031690	0	0.1	0.1	0	0	0	9.7	10.5	0	1.2	0	0
FBgn0045486	0.9	1.6	1.8	1.7	1.2	1.1	0.3	1.5	1.7	2.3	1.2	3
FBgn0261243	0.9	0.5	1.7	0.7	1	0.9	4.4	2.4	2.4	1.6	0.7	0.6
FBgn0034484	0	1.5	0.2	1.6	0.1	0.1	0.7	0.2	0.1	0.2	0.2	4
FBgn0028856	0.1	0	0	0.1	0	0	14.6	0.1	0.1	3.1	0.1	0.1
FBgn0003382	2.7	0.8	3.3	1.1	3.7	2.1	4.6	2.6	4	7.7	4.5	4.6
FBgn0053465	1.6	1.8	1.2	1.2	2.2	1.2	2.1	2.4	11.3	10.2	2	2.3
FBgn0015247	2.2	1.3	0.9	1.1	0.6	0.9	1.7	2	0.6	0.6	2.3	1.1
FBgn0003435	1.5	0.2	0.1	0.1	0.1	0.1	7.1	0.7	0.3	1.8	0.5	0.1
FBgn0036985	0.5	0.7	1.9	0.6	0.9	0.6	1.2	1.7	0.9	1.4	0.7	1.9
FBgn0015520	1.3	0.5	0.2	0.4	0.2	2.7	1.9	1.2	0.3	0.4	1.2	0.1
FBgn0015791	2.5	1.9	0.8	1.3	1.4	1.2	2.2	1	2.2	1	2.6	1.1
FBgn0032447	10.9	3.3	0.5	0.2	0.2	0.3	9.1	0.2	0.1	2.1	11.5	0.6
FBgn0039387	0.3	0.7	1.4	1.5	0.6	0.6	4	2.7	0.8	4	0.6	1.8
FBgn0036454	3.5	4.6	0.2	3.5	0.2	0.1	0.9	0.2	0.2	0.2	3.1	5
FBgn0030482	0.1	0.8	0.1	0.2	5.4	0.3	0	0	0.1	0.3	0.2	4.3
FBgn0052082	1	3.8	0.5	4	0.4	0.2	1.2	0.7	0.4	0.8	0.6	2.8
FBgn0051089	0.5	0.6	19.3	0.9	1.3	0.3	0.4	2.4	1	1.1	0.5	1.1
FBgn0033196	21.5	7.5	0.8	0.9	0.3	0.6	0.5	10.7	0.5	0.3	22.5	0.4
FBgn0003041	0.4	0.2	0.2	0.9	0.1	2.6	0.4	0.6	0.1	0.1	0.7	0.3
FBgn0030221	0.5	0.3	0.2	0.3	0.7	0.2	15.4	1.1	0.5	2.8	0.4	0.6
FBgn0030151	0.6	0.6	0.6	0.5	0.6	1.4	0.2	1.9	0.9	0.8	0.8	0.7
FBgn0039972	0	0	0	0	0	2.6	0.1	0.9	0	0	0	0
FBgn0011592	2.5	0.8	3.7	2	0.1	1.5	0.5	0.3	0.4	6.4	1.5	0.3
FBgn0032314	0	0	0	0	0	0	12.5	0.1	0	1.3	0	0.1
FBgn0050395	0	0	0	0.1	0.1	0	0.4	49	0	0.1	0	0.1
FBgn0053180	1.8	0.7	0.6	0.7	0.6	1.8	1.7	0.5	0.8	0.9	1.5	0.6
FBgn0011837	0.2	0.8	1.2	1.1	1.8	1.8	0.4	1	1.1	2.1	0.3	1.2
FBgn0036117	0.1	0.6	1	0.7	11.1	1.3	1.2	0.2	1.5	0.5	0.2	0.8
FBgn0030913	48.1	8.9	0.8	0.5	0.9	0.3	0.5	0.7	0.9	1.8	18	1.4
FBgn0001269	0.7	0.9	0.2	0.2	0.3	0.1	3.6	0.1	0.1	0.8	0.9	0.7
FBgn0039641	0.3	1.2	0.8	2.3	1.3	1.3	0.1	2.2	0.9	1.8	0.5	1.9
FBgn0037630	1.1	1.1	4.3	1.7	1	0.3	5.6	0.4	1.8	0.4	0.8	1.3
FBgn0033557	0.5	0.5	0.5	0.4	0.6	2.4	0.2	1	0.2	0.2	0.6	0.4
FBgn0000318	0.8	1.1	2.1	1.3	2.9	1	1.3	0.6	3.7	1.2	0.7	0.8
FBgn0038462	1	0.8	0.8	0.9	1.7	1.8	0.8	1	1.5	1	1.4	1.4
FBgn0052816	0.3	0.9	0.3	1.7	0.4	1.6	0.3	3.6	0.5	0.9	0.1	0.7
FBgn0031322	0.8	2.2	1.2	2.8	0.9	0.3	0.2	1.2	1.8	0.9	0.7	2.8
FBgn0041096	1.5	1.7	1.8	2.2	4.1	0.5	0.3	2.4	2.5	0.3	1.3	1.4
FBgn0000108	18.2	7.4	0.1	0.1	0.1	0	0	0.1	0	0.1	14.9	0.5
FBgn0038180	0.8	2.7	3.7	0.5	2.7	0.1	0.5	0.2	1.3	1.1	0.4	2.9
FBgn0038897	0.3	1.5	2.2	0.4	11.9	0.2	0.1	0.3	1	5.5	0.2	2
FBgn0032031	1.4	1	1.3	1.4	2	1.5	0.7	1.4	0.9	0.8	1.8	1.3
FBgn0026390	1.3	2.2	1.4	1.6	1.3	0.8	1.6	2.6	1.7	2	0.4	2.3
FBgn0033778	21.6	31.1	13.3	0.9	1.8	0.2	0.7	1.1	0.4	0.7	0.5	1.2
FBgn0032723	1.6	0.6	0.4	0.5	0.3	1.9	4	0.5	0.6	1.1	1.4	0.5
FBgn0040323	1	3	0.2	7.6	0.9	0.5	0.3	0.8	0.2	2.9	1.8	2.9
FBgn0051769	0.2	5.6	0	0.4	0.1	0	0	0	0	0.9	0.1	5.6
FBgn0032194	0.4	0.4	0.5	0.6	0.7	2.2	0.3	1.1	0.8	0.4	0.4	0.5
FBgn0029174	0.7	0.6	0.3	0.4	0.4	1.4	0.6	0.7	0.3	0.4	0.8	0.7
FBgn0052183	32	8.1	0.3	0.2	0.1	0	0.3	0.3	0.2	0.4	25.9	2.1
FBgn0039293	0.5	0.6	0.8	0.5	0.4	2.1	0.2	1.2	0.6	0.9	0.6	0.5
FBgn0036144	8.4	2.3	0.8	3.2	0.1	1.6	0.2	3.8	0.2	0.3	8.8	0.6
FBgn0044046	0.8	0.2	0.2	0.1	0.3	1.7	0.5	0.2	0.3	0.2	16.4	0.3
FBgn0035622	1.1	0.9	1.3	1.1	1.3	1.9	0.4	7.2	1.9	1.3	1.2	0.7
FBgn0051680	0	0	0	0	0	0	0.1	31.6	0	0	0	0.1
FBgn0259834	0.2	0.8	2.7	3	0.5	1.7	1.4	0.2	0.4	0.5	0.2	0.7
FBgn0051637	2.9	2.1	1.5	1.6	2.9	1.6	0.2	0.6	1.1	0.7	3.3	0.9
FBgn0036934	23.3	6.1	1.2	1.4	1.2	0.3	0.4	2.5	1.1	0.8	14.2	1.3
FBgn0016041	0.6	0.6	0.5	0.8	0.5	1.5	0.2	0.6	0.2	0.2	0.7	0.6
FBgn0052699	0.5	0.3	0.7	0.5	0.2	2.5	0	0.3	0.5	0.3	0.3	0.3
FBgn0033638	2.4	0.7	1	1.3	0.7	1.3	0.2	0.7	2.1	1.7	1.8	1.5
FBgn0024807	5.5	1.5	0.9	1.5	1.4	1.6	1.1	1.5	1.4	1.5	5.8	1.5
FBgn0034400	1.6	1	2.2	1.5	1.3	1.6	1	1.3	2	1.7	1.7	1.1
FBgn0010288	0.4	0.3	0.6	0.5	0.4	1.4	1.8	0.5	2.7	0.7	0.5	0.3
FBgn0052432	20.8	3.1	0.9	0.5	0.6	0.4	0.1	0.4	0.8	0.3	11	1.1
FBgn0038929	15	2.9	0.5	0.5	0.3	0.3	0.2	0.4	0.5	1.1	3.9	0.4
FBgn0031011	0.7	0.8	3.1	9.9	0.3	0.6	1.1	1.2	0.4	1.6	0.4	1.6
FBgn0032419	0	0	0	0	0	0	12.1	0	0.1	1.2	0	0.2
FBgn0036062	0.7	0.4	0.3	0.3	0.3	2.7	1.1	0.3	0.6	0.5	0.5	0.4
FBgn0015380	10.9	2.9	0.9	0.6	0.8	0.3	0.2	1	1.3	0.2	11.3	0.6
FBgn0031519	0.1	0.1	0.2	0.1	0.5	2.3	0.7	0.1	0.3	0.4	0.1	0.3
FBgn0031851	0.7	0.5	0.7	0.5	0.5	1.7	0.4	1	0.4	0.3	0.8	0.6
FBgn0052594	3.2	2.1	0.7	2.9	1	0.7	0.6	3.7	1.2	0.8	2.8	1.6
FBgn0013435	1.7	1.2	0.6	0.9	1.1	1.5	0.8	1.2	0.9	1.1	1.4	0.4
FBgn0015773	1.1	0.9	8.2	4.2	0.6	0	1	3	0.5	0.4	0.3	1.6
FBgn0039536	50.7	4.7	0.5	0.3	0.4	0.3	0.2	0.5	0.3	0.4	40.4	0.5
FBgn0039613	0.5	2.6	0.4	0.3	0.7	0.4	0.3	0.2	0.6	7.6	0.8	1.8
FBgn0032262	0	0.4	0.1	0.1	0.1	2.9	0.1	1.8	0	1.6	0	0.7
FBgn0033727	0.8	1.6	2.2	1.6	0.9	0.7	0.6	2.3	2.6	3.4	0.3	0.4
FBgn0039178	16.1	8.8	0.6	0.4	0.2	0.2	1.3	0.4	0.8	63.4	30.1	2.5
FBgn0036183	2.5	0.7	0.1	0.1	0	0.1	10.4	0.1	0.1	1.2	3.6	0.9
FBgn0036411	0.6	0.8	1.9	0.7	0.5	0.5	0.5	0.4	0.3	0.2	0.8	0.6
FBgn0011474	1	0.4	0.3	0.4	0.2	3	0.2	0.4	0.3	0.3	0.9	0.5
FBgn0014075	0.8	0.9	0.8	0.9	0.6	1.4	0.7	6.2	1.7	1	1	0.7
FBgn0034417	0.4	0.8	2.8	0.9	1.6	0.2	3.8	41.3	1.2	0.1	0.3	0.6
FBgn0031375	35.1	7.1	0.2	0.1	0.3	0.2	1.3	0.8	0.1	1	0.2	0.4
FBgn0035647	0.7	0.4	0.6	1.2	1.4	0.1	5.1	0.9	2.5	1.8	1.3	1.3
FBgn0036450	1.3	0.6	0.5	0.7	0.9	2.5	0.7	1.3	0.7	0.7	1.1	0.5
FBgn0034687	0.1	0.1	0.1	0.2	0.2	0.1	10.9	0.2	0.1	1.4	0.2	0.2
FBgn0004394	2.2	0.7	5.2	2.5	0.4	0.2	0.3	0.7	0.4	0.3	4.4	0.4
FBgn0051268	2.3	3.6	2.4	3.1	3.5	0.7	1.9	5	3.2	6	1.5	3.1
FBgn0002571	0	0	16.6	0.3	0.1	0	0	0	0	0	0	0
FBgn0052683	39.3	5	0.9	0.7	0.6	0.2	0.1	0.8	1.1	0.2	17.8	0.7
FBgn0005533	0.7	1.1	1.2	1.1	0.7	0.9	0.3	1.8	1.1	1.8	1	1.3
FBgn0031118	5.1	1.6	2.1	1.8	1.8	3.2	0.3	1.3	1	0.4	3.2	0.7
FBgn0028499	7.1	1.7	0.1	0.4	0.4	1.5	0.4	1.3	0.8	0.4	9.8	0.6
FBgn0036612	0.3	0.1	0.3	0.5	0.4	1.2	0.5	0.3	0.2	0.1	0.3	0.3
FBgn0040877	14.7	3.6	0.7	0.7	0.6	0.3	0.3	1.2	0.8	0.9	10.5	1
FBgn0000024	7	5.7	2.9	0.3	1	0.1	0.2	0.6	2.1	1.6	15.1	1
FBgn0035279	1.2	4.6	0.6	112.1	1.1	1.3	0.4	3	1.5	0.8	1.2	2.2
FBgn0053481	22.7	10.3	0.2	0.4	0.1	0.1	0.1	0.4	0	0.1	20.4	0.6
FBgn0028509	2.1	1.6	1.3	0.7	1.8	1.1	0.2	0.3	1.4	0.5	1.8	1.1
FBgn0085360	0.3	4	0	0.3	0.1	0	0.1	0	0	1.5	0.2	4.3
FBgn0036603	1.1	0.9	0.7	0.8	1.3	0.4	0.7	1.4	1.3	1	1.2	1.4
FBgn0040506	0.3	0.4	0.6	0.1	0.6	0.3	5.5	0.2	1	1.8	0.1	0.2
FBgn0011725	0.6	0.2	0.2	0.2	0.2	1.5	2.9	0.4	0.4	0.7	0.4	0.2
FBgn0011606	0	0.1	0.1	0.1	0.1	2.4	2.7	0.2	0.1	0.3	0	0.1
FBgn0036697	1.7	1.6	1.9	0.6	0.6	1.6	0.1	0.3	0.7	1.2	2.6	1.4
FBgn0033042	0	0.2	0.2	0.1	0.1	0	19	0.1	0.2	3.2	0.2	0.5
FBgn0034166	0.6	4.8	1.3	7.2	0.5	0.2	1.5	1.6	0.4	1.2	0.8	1.7
FBgn0053158	0.5	0.6	0.8	0.6	0.6	1.5	1.3	1	0.8	0.8	0.7	0.7
FBgn0051760	46.6	7	0.1	0.5	0.8	0	0.2	12.2	0.5	0.4	43.4	0.9
FBgn0000479	4.1	1.3	0.8	0.7	1.5	1	0.2	0.8	0.7	0.5	3.3	1.6
FBgn0030332	3.5	4.2	6.9	6.8	4.7	0	0.2	0.1	0.4	0	3.9	2.5
FBgn0039124	0.1	0.2	0.2	0.3	0.2	0.1	17.5	0.1	0.3	3.4	0.3	0.5
FBgn0052057	26.1	5.1	0.6	0.8	0.3	0.3	1.3	0.7	0	0.2	14.3	0.4
FBgn0052647	3.3	3.4	0	0.7	0.1	0	0.1	0	0	0.9	4	2.9
FBgn0037138	3.3	2.4	0.2	2.3	0.1	1.1	0.5	1.1	0.1	0.2	4.1	1.1
FBgn0033741	0.2	0.3	0.4	0.2	0.3	2.3	0.1	0.8	0.1	0.1	0.3	0.3
FBgn0036770	0.6	0.5	4	2.9	3.7	1.7	0.4	0.1	3.4	0.4	0.6	1
FBgn0000711	3	2.9	1.8	1.7	0.8	1	0.3	2.8	1	0.5	3.9	1
FBgn0034142	0.1	3.3	1.9	7.7	4.3	0.1	0.2	2.3	5.2	0.3	0.1	2
FBgn0030396	0.1	0.2	7.8	1.9	0.5	1.1	0.1	1	1.5	0.1	0	0.1
FBgn0034354	0.2	0.8	0.7	3.7	1.8	1.7	0.1	1.3	0.7	0.3	0.2	0.6
FBgn0037456	0	0	0.1	0.1	0.1	0	13.3	0.1	0.1	2.3	0.1	0.2
FBgn0031990	1.9	1.6	1.5	1.4	1	1.2	1.5	2.1	1.2	1.4	1.6	1.5
FBgn0053288	0.2	2.8	0.4	0.5	0.8	0.3	0.1	74.9	0.8	0.4	0.4	1.4
FBgn0031347	0	0	0.1	0	0	0	11.6	0	0	1.6	0	0.1
FBgn0052645	0.2	0.8	0.9	1.6	0.8	1.5	0.4	0.7	0.2	0.2	0.2	1
FBgn0033667	0.4	2.1	0.3	7.7	0.6	0.3	2.3	0.5	0.6	0.5	0.5	3.9
FBgn0032907	0.5	0.4	0.3	0.5	0.8	2.1	1.1	0.4	0.9	0.3	0.6	0.3
FBgn0037153	13	3.7	0.5	3.3	1.1	0.3	0.7	0.5	1.3	1.1	10.4	0.4
FBgn0039851	0.1	0.1	0.1	0.5	0.3	0.1	0.2	0.5	0.2	0.3	0.1	0.5
FBgn0034664	0	0.1	13.8	0.1	0	0	0	0	0	0	0	0.1
FBgn0040805	5.7	2.6	2.1	0.9	22.4	0.2	5.9	0.5	0.3	0.5	9.8	0.3
FBgn0043841	4.8	3	0.7	3	0.1	0.1	0.3	0.3	0.1	0.3	9.4	1.8
FBgn0038881	2.2	1.2	2.8	2.2	3.2	0.3	1	4.9	7.8	2.5	2.1	1.3
FBgn0036732	2.1	2.4	0.3	0.5	1.8	0.2	0.2	0.2	6	6.2	1.2	3.4
FBgn0053100	0.7	0.5	0.5	0.6	0.7	1.8	2.3	0.6	0.3	0.6	0.4	0.4
FBgn0028418	5.2	1.7	0.6	0.3	0.2	0.2	0.1	0.3	0.1	0.3	47.9	1.4
FBgn0027570	0.8	2.1	0.1	1.7	3.9	0.7	0.6	0.1	4.2	1.2	2.5	0.9
FBgn0052137	0.7	1.2	3.4	4	2.2	0.4	0.2	2.2	1.4	0.2	1.2	0.7
FBgn0039069	3.1	1.2	0.5	1.4	1.6	0.5	1.4	1.2	1.7	1.1	2.4	0.6
FBgn0002023	5.5	0.7	3.1	0.1	1.2	0.1	6.9	0.3	1.1	2.4	3.9	0.3
FBgn0031900	0.6	0.5	0.9	1.2	0.9	0.9	0.9	1.2	0.9	0.5	0.4	1.4
FBgn0086129	2.3	0.9	0.4	0.8	0.8	2.1	1.2	0.7	0.7	0.5	1.8	0.6
FBgn0033216	0.2	0.2	22.4	0.9	0.3	0.1	0.2	0.5	0.3	0.4	0.3	0.3
FBgn0250871	0.2	2.8	0.4	4.5	0.2	0.2	0.3	0.4	0.1	0.1	0.2	2.8
FBgn0035504	12.6	3.3	0.2	0.3	0.5	0.3	0.7	0.5	0.2	0.6	14.4	1.1
FBgn0036922	2.2	1	0.4	1	0.2	2.2	0.3	0.8	0.8	1.1	1.3	0.6
FBgn0016930	8.5	4.4	1.3	0.9	0.4	1.1	1.1	0.7	0.2	1.8	8.9	0.8
FBgn0027843	0.2	3.9	6.1	1.2	5.1	0.5	0.4	0	0	0.1	0.2	1.9
FBgn0003513	0.3	6	0.4	0.4	0.3	0	0.2	1	0.5	0.5	0.5	2.9
FBgn0031995	2	1.2	0.6	1.8	0.5	1.1	0.4	0.5	0.3	3	2.3	3.5
FBgn0051363	0.5	0.1	0	0	0	0.1	16.1	0	0.2	2.1	0.4	0.1
FBgn0032116	0.2	1.6	8.1	3.8	7	0.3	0.1	0.5	7.6	0.4	0.1	1.8
FBgn0052268	1.1	4.3	1.8	0.9	4.2	1.1	1.8	2.6	1.5	3.6	1.6	3.3
FBgn0051030	17.2	10.8	0.1	0.1	0	0	0.5	0	0.1	0.2	21.5	0.5
FBgn0003896	18.8	3.3	1.7	1.5	0.3	0.1	0.6	0.3	0.3	0.3	4.3	1.5
FBgn0038165	13	2.1	0.9	0.9	0.3	0.7	2.5	5.6	1.1	1.2	7.9	1.9
FBgn0034933	0.4	0.5	0.6	0.4	0.5	2.2	1.4	0.8	0.5	0.5	0.4	0.5
FBgn0010762	3.9	0.4	0.2	0.5	0.3	1.8	1.8	0.2	0.7	0.6	2	0.2
FBgn0033236	1.3	0.7	0.6	0.6	1.4	2.3	0.1	0.9	1.4	0.5	1.3	0.5
FBgn0035344	0.1	4.6	0.2	0.2	0.1	0	0	0.1	0.2	0.1	0.1	5
FBgn0053458	5.1	6.5	4.4	5.4	9.7	2	3.8	6.5	10.5	13.6	5.2	11.5
FBgn0260429	1.2	1.3	1.2	0.9	1.1	0.7	0.9	1.8	1.5	2.5	0.6	1.1
FBgn0040319	1	0.9	3.8	1.5	4.3	0.9	0.3	0.2	0.8	0.2	1.2	1.4
FBgn0038286	1.4	0.8	0.5	0.6	1.5	1.8	0.7	1.1	0.9	1.2	1.6	0.9
FBgn0034131	0.8	0.9	1.2	0.5	0.4	0.2	0.2	1.1	0.5	1.3	0.3	0.4
FBgn0011766	2.4	1.5	1.6	2.3	1.5	1.1	0.2	3.3	2.5	1.3	3.4	1.1
FBgn0033480	0.9	0.7	0.9	1.1	0.5	1.1	0.6	0.8	0.4	0.4	0.8	0.9
FBgn0041713	0.1	6.1	0.1	1.4	0	0	0.1	0.1	0.1	0.2	0.1	6.4
FBgn0038148	0.1	2.1	0.8	0.7	0.2	0.4	0.5	1.5	1.2	0.7	0.7	0.9
FBgn0050377	0.1	0.2	0.1	0.3	0.3	2.8	0.2	0.1	0.1	0.1	0.2	0.4
FBgn0036614	1.4	0.6	1	0.8	1	2.1	1.6	0.8	1.5	0.5	1.4	0.6
FBgn0037949	8	3.3	0.8	1.2	1.1	1	0.3	0.6	1	1	8.3	1.3
FBgn0038304	1.2	0.8	0.9	0.9	1.4	1.6	1.8	4.1	1.8	1	1.3	0.7
FBgn0033652	9.1	2.9	1.9	0.9	0.3	0.4	0.4	1	0.8	0.6	9.2	0.8
FBgn0020908	0	0	0	0	0	0	0	0	0	0	0	2.3
FBgn0042092	0.3	0.2	0.4	0.3	0.2	2.6	0.3	0.9	0.2	0.2	0.3	0.3
FBgn0262582	1.1	1.6	1.5	1.2	0.6	1.8	1	1.9	1.2	2.2	0.8	2.4
FBgn0031239	3.1	1.7	2	1.3	1.6	0.7	6.5	2.1	1.3	4.1	2.3	1.7
FBgn0051221	32.8	7.5	0.3	0.3	0.2	0.1	0.2	0.3	0.2	0.3	23.8	0.7
FBgn0004638	2.8	1.9	0.9	2	1.3	0.8	0.5	3.3	1.6	4.5	2.6	1.1
FBgn0039897	0.1	0.9	0.2	1.5	0.2	0	0.1	0.4	0.3	0	0.2	3.3
FBgn0034909	4.5	3	1.1	3.9	0.1	0.2	0.1	1	0.2	2.6	7.5	5.5
FBgn0004795	0.1	0.6	0.2	1.1	0	3.1	0.2	1.8	0	0	0.1	0.1
FBgn0036831	0	0.1	13	0	0	0	0	0	0	0.1	0	0
FBgn0035159	0.8	0.7	0.7	0.5	0.7	1.6	1.6	0.3	1.1	1.2	1.1	0.5
FBgn0003345	3.1	1.4	1.4	1.8	2.4	0.9	0.9	3.8	1.4	0.5	3.2	1.7
FBgn0004895	0.1	1.2	0.5	6	0.9	0.3	1.4	0.3	0.8	0.1	0.8	1.1
FBgn0031861	0.1	0	0.3	0.2	0.1	0.1	12.4	0.1	0.1	1.1	0.2	0.3
FBgn0016660	2	2	1.5	1.2	1.7	1	2.3	1	1.8	2.6	5.2	2.2
FBgn0030395	0.9	1.7	2.5	2	1.9	1.8	4.6	2.8	1.6	5	1.9	2.8
FBgn0011676	43.9	6.7	0.4	0.8	0.4	0.5	3.5	0.6	0.3	0.4	18	0.2
FBgn0039590	14.4	3.3	1.3	1.9	1.4	0.7	0.4	1.5	0.9	0.7	7.7	1
FBgn0039344	4.3	1.3	5.1	2.5	2.9	2.3	3.1	3.8	3.5	2.9	5.2	4.7
FBgn0022382	2.2	0.5	0.8	0.9	1.1	2.2	0.1	0.4	1.3	0.3	0.6	0.3
FBgn0039137	2.5	1.1	2.4	1.7	15	1.6	0.4	0.4	1.1	0.8	2.5	0.7
FBgn0044020	2.2	1.7	0.5	0.6	0.4	1.7	0.4	1.6	4.6	1.7	2.3	0.5
FBgn0032878	0.1	0.2	0	0.1	0.1	0	18.2	0.3	0.2	1.8	0.1	0.2
FBgn0039465	2.8	1.6	0.3	0.3	0.2	2.4	0.2	0.2	0.4	1.7	2.3	0.7
FBgn0039936	1.3	0.6	0.5	0.8	0.9	1.8	0.4	0.7	0.7	0.5	1.5	1.7
FBgn0036422	0	0	5.5	0.1	0	0	0	0	0	0.2	0	0
FBgn0031909	1	0.8	0.8	0.9	0.8	1.6	1.3	0.6	1.2	0.9	0.9	0.6
FBgn0034230	4.8	1.8	1	1.3	0.8	1.6	0.6	1.8	1.4	2	5.7	1.4
FBgn0032683	2.3	2.1	1.1	2.5	2.6	0.4	0.6	2.6	2.2	0.2	3.9	2.3
FBgn0032442	0.4	2	2.8	2.2	1.8	1.4	2.3	3.6	1.9	2.8	0.8	1.9
FBgn0005659	0.6	2	0.9	3.5	0.4	0.3	0.3	0.4	0.2	3.3	0.3	3.4
FBgn0013348	0	0.4	0	0	0	0	0	0	0	0	0.1	2.7
FBgn0031725	15.4	2.9	1.7	0.6	0.9	0.7	1.1	0.6	1.1	0.8	7.8	0.3
FBgn0036556	3.3	2	2.1	2.8	2.7	0.4	0.3	3	2.5	0.8	3.1	2.8
FBgn0025637	1.2	1	1.1	1.4	1.5	1.2	0.2	1	1.6	1.1	1.1	0.8
FBgn0052719	0.2	0.1	0.2	0.1	0.2	0.1	17.6	0.1	0.1	2.7	0.1	0.6
FBgn0051992	2.4	1	0.9	1.1	2	2	0.5	1.2	1.4	1.4	2.4	1.1
FBgn0015903	0.2	0.2	0.5	0.5	0.4	0.6	1	0.3	0.4	0.4	0.3	0.4
FBgn0035149	1	0.5	0.6	0.7	0.7	1.9	2	0.8	0.8	0.7	0.9	0.5
FBgn0003890	0.8	1.8	2.8	2.3	3.2	0.3	0.1	1.8	1.6	0.2	0.9	2
FBgn0035416	1	0.8	1	1	1.2	1.8	0.4	1.1	1.1	0.8	1.2	0.8
FBgn0029816	0.1	0.1	0	0.1	0.1	0	11.5	0	0.1	0.8	0.1	0.2
FBgn0031295	0	0	0	0	0	0	7.3	0	0	1.2	0	0.1
FBgn0086679	2	1.7	0.5	0.9	2	1.6	0.9	1	1.6	2.1	2	1.5
FBgn0051721	11.7	1.8	8.9	2.3	0.9	0.2	0.9	0.3	0.5	0.3	8.7	0.7
FBgn0004666	0.5	0.2	0.1	0	0.1	2.1	0.1	0.3	0	0.3	0.2	0.2
FBgn0036470	0.1	0.1	0.1	0.1	0.1	0	2.3	0.1	0	0.4	0.1	0.1
FBgn0004583	0.3	1	1.2	1.6	0.8	1	0.4	1.9	1.4	1.1	0.4	1.5
FBgn0051999	2.2	1.8	0.7	3.1	16.6	0.7	0.2	1.4	15	0.2	3.5	1.6
FBgn0034070	12.7	5	0.4	0.8	0.5	0.2	0.4	0.7	0.5	0.4	9	2.1
FBgn0082582	1.4	1.3	0.6	1.5	0.6	0.6	0.4	4.8	2.5	0.3	1.3	1.9
FBgn0041097	16.1	3.2	1.2	0.3	0.6	0.5	2	0.5	0.5	0.6	15.3	0.8
FBgn0040341	0.3	0.3	0.7	0.4	0.4	0.6	0.4	62.8	0.4	0.3	0.4	1.2
FBgn0032955	0.5	1.1	0.6	0.5	0.7	1.5	0.4	1.1	1.1	1.5	0.5	1
FBgn0032726	0.3	3.2	2.7	1	11.6	0.1	0.1	0	14.4	22.7	0.3	6.2
FBgn0024836	14.4	3.8	1.1	1.2	1.2	0.4	0.6	2.1	1.6	0.6	8.3	1.2
FBgn0029881	5.1	2.2	2.5	2	0.3	0.3	0.9	3.8	0.2	0.4	5	1.7
FBgn0023083	1.5	1.1	1.4	2.4	1.3	1.6	0.4	0.9	1.1	0.5	1.4	1.2
FBgn0015872	0.1	2	3	4	5.1	0.2	2.7	1.3	8.8	0.2	0.3	0.9
FBgn0028471	2	0.8	0.5	0.6	0.7	2.2	0.8	0.8	0.6	0.7	1.9	0.5
FBgn0250867	13.5	1.8	1.5	1.5	0.8	0.7	0.2	0.3	0.1	0.8	6.5	1.4
FBgn0032175	0.2	0.2	0.3	0.5	0.4	0.2	8.2	0.7	0.4	2.7	0.4	0.6
FBgn0033508	0.7	2.1	0.3	1.8	0.9	0.4	1.8	4	1.2	0.9	0.6	3.7
FBgn0051380	0.1	0.7	0.3	0.6	34.5	0.1	2.4	1.2	37	1.8	0.2	1
FBgn0033476	2	2	2.1	2.3	3	1	0.2	0.6	5.5	7.5	2.4	2.6
FBgn0038499	2	1.3	1.1	1.1	1.4	2	0.2	0.7	2	1.9	2.1	1
FBgn0038860	1.1	0.6	0.6	0.6	0.5	2	0.6	0.6	0.8	0.5	1	0.7
FBgn0025678	0.5	0.6	1.5	0.5	1	1	0.6	9	1.4	1.4	0.6	0.6
FBgn0015033	0.1	2.8	5.8	0.3	4	0.2	0.9	3.7	0.8	1.1	0.1	2.1
FBgn0261403	2.2	1.3	1.1	1.2	1.1	1.5	0.2	1.4	1.6	1	2.7	1.4
FBgn0030407	0.8	2.2	2.7	0.9	0.6	1.3	0.8	1.9	0.6	1.4	1	1.6
FBgn0034187	0.1	0.2	3.4	0.4	0.1	2.7	0.1	0.1	0.3	0.2	0.2	0.2
FBgn0031745	0.4	1.3	1.5	2.3	1.8	0.9	0.7	0.3	0.3	0.5	1.3	0.7
FBgn0002577	0.6	0.6	0.4	1.5	0.4	0.6	0.6	0.5	0.6	0.6	0.5	1.5
FBgn0051690	16.3	3.8	1.3	1.1	1.1	0.3	0.9	2.7	1.1	0.3	10	3.1
FBgn0086907	0	0	0	0	0	0	8.3	0.1	0	1	0.1	0
FBgn0025393	1.8	1.8	1.1	0.8	0.4	0.6	0.5	0.3	0.2	0.4	1.8	1.3
FBgn0010382	0.1	0	0.1	0	0.1	4.6	0	0.1	0.1	0.1	0.1	0
FBgn0027528	1.3	1.6	3.4	1.3	3.2	0.9	0.1	0.1	3.2	0.1	2.2	1.5
FBgn0032252	1.8	1	2.3	1.4	1.2	0.2	1.5	10.1	0.5	0.6	2.1	3.2
FBgn0035413	0.5	0.9	2.1	3.5	3.2	0.8	4	0.9	25.5	1.5	0.5	1.1
FBgn0034885	0.2	3.9	1.8	0.4	1.5	0	0	0	2.9	1.7	0.2	4.7
FBgn0051163	2.9	0.5	1	1.7	1	0.4	0.8	2.4	1.2	2	2.3	1.4
FBgn0031432	0.4	4.1	14	0.2	0.2	0	0.1	0.1	1.7	34	0.3	2.2
FBgn0260866	1.2	1.8	2.2	1.9	1.1	0.9	0.4	2.5	1.4	0.8	0.8	1.1
FBgn0250789	3.1	1.6	2.8	2.7	1.3	0.7	0.5	1.7	1.4	0.8	3.8	1.5
FBgn0002524	0.8	0.6	1.9	1.3	1.2	2.4	0.2	0.7	1.6	1	1.3	0.4
FBgn0005666	0	0.7	0.4	1.7	0.1	0.1	0.2	0.9	0	0.2	0.1	2.5
FBgn0024732	2.8	0.8	0.1	0.2	0	3.3	0.1	0.5	0	0.2	1.3	0.5
FBgn0027280	1.9	1.7	0.7	1.8	1.4	1.4	0.4	0.7	2.7	1.6	2	1.4
FBgn0002772	0	0.8	0.7	2.2	0.1	0	0.2	1.1	0.1	0	0	2.2
FBgn0040273	1.6	0.9	0.7	0.9	0.9	1.6	0.5	1.7	0.9	0.8	1.5	0.9
FBgn0033289	0.2	6.8	1.8	0.3	0.3	0.2	0.3	0.4	0.4	0.4	0.2	3.8
FBgn0036927	12.2	4.9	1	0.6	5.4	0.5	0.2	0.4	1.3	0.6	23.8	1.2
FBgn0032707	1.1	4.2	0.5	1	0.7	0.3	14.8	1.4	0.7	3.1	0.5	4.5
FBgn0035534	1.3	0.9	1.3	0.9	0.5	1.2	1	1.1	0.4	0.4	1.5	0.8
FBgn0029994	0.4	3.4	3.2	4.2	0.4	0	0.2	0.4	0.1	0.4	0.2	4.1
FBgn0005674	0.5	0.7	1	0.9	0.8	1.5	0.3	1.3	0.4	0.5	0.6	0.9
FBgn0004644	0	0.6	5.8	11.1	0.2	0.1	2.9	0.1	0	0.6	0.1	0.4
FBgn0000278	0.6	3.2	0.7	1.1	0.7	0.7	0.3	0.5	1	2.5	0.4	2.7
FBgn0036769	0	1.6	0	3.3	0.1	1.8	0.1	0	0	0	0	1.3
FBgn0033767	4	1.3	0.8	0.4	0.4	0.4	3.7	0.4	0.3	1.9	3.9	0.6
FBgn0030286	3.5	1.4	0.6	1.2	1.6	1.7	0.3	1.9	0.9	0.3	2.6	1.4
FBgn0039821	0.1	2.5	2.5	3.5	35.9	0.1	0.7	3.1	6.5	0.3	0.2	2.1
FBgn0036995	4.5	3.2	2.4	0.4	0.5	0.3	13.3	0.5	0.8	3.4	1.9	2.6
FBgn0036461	1.8	1	0.9	1.4	35.5	0	0.8	0.1	126.5	0.2	2	0.2
FBgn0051156	1.5	0.9	0.8	1.4	1.3	1.9	0.9	1.4	0.9	1.5	1.4	1.5
FBgn0041789	1	0.9	1.3	2.8	1	1	0.5	1.6	2	1	1.6	2.9
FBgn0052160	0.3	1.5	0.5	0.9	1	1.6	1	1.9	2.6	0.4	1.9	0.5
FBgn0036623	0.9	1.2	3.3	2.1	0.9	0.8	0.4	0.8	1.2	2.7	0.9	2.7
FBgn0030895	30.2	49.2	1.2	0.6	0.6	0.4	1.4	0.3	0.3	1.2	8.2	1.2
FBgn0032512	0.8	0.8	0.6	1	1	1.7	2	0.7	0.4	0.6	0.9	0.8
FBgn0030590	2.3	0.8	1.2	9.8	1.3	0.5	4.5	1.1	0.6	1.2	1	1.4
FBgn0027343	0.4	1	2.3	2.9	1.5	1.6	0.5	11.3	1.9	0.1	0.4	0.8
FBgn0026160	4	1.6	0.7	3.1	0.9	0.1	6	1	1.7	1	3.4	1.5
FBgn0046113	0.3	1.1	1.7	4.5	0.6	0.2	1.6	5.1	0.4	0.4	0.2	2.4
FBgn0038854	0.8	0.7	1.1	1.5	2	1.4	0.2	0.8	2.5	1.5	0.7	1.2
FBgn0038461	0.9	0.9	0.9	0.8	1.2	1.4	0.8	1.2	1.4	1.4	1	1.3
FBgn0039203	0.1	1.4	0.2	26.6	0.1	0	0	0.1	0	0	0.1	0.2
FBgn0020440	3.7	1.2	0.8	1.3	2.4	2.8	0.6	1.2	2.4	2.2	3.2	1
FBgn0035348	0.5	1	3.6	2.3	1	0.7	1.6	2.4	1.6	1.5	0.6	1.1
FBgn0250823	2	1	1.2	0.9	0.9	2.7	0.4	0.4	1.2	0.6	1.6	0.5
FBgn0040817	0.1	3.3	1.1	5.5	0.4	0.2	0.2	0.3	0.8	0.6	0.2	2.5
FBgn0032422	0.2	2.6	0.1	4.8	0.1	0.3	0.1	5.4	0	0	0.5	2.1
FBgn0027660	0.3	0.9	0.1	1.4	0.9	2.6	0.3	3.9	1.4	0.2	0.4	0.9
FBgn0001222	1.3	0.8	0.5	0.8	0.7	2	0.4	0.8	0.6	0.6	1.1	0.6
FBgn0031914	0.3	3.3	0.9	2.8	0	0.4	0.1	0.5	0	0	0.5	4.6
FBgn0047338	0	0	0	0	0	0	8.5	0	0	0.8	0	0.1
FBgn0036348	0.3	0.5	0.4	0.3	0.3	0.1	10.3	0.4	0.2	1.6	0.2	0.4
FBgn0004910	4.9	2.1	1.7	3.9	3.3	0	0.1	0.1	2.7	0.1	5.4	1
FBgn0260753	1.6	2.2	0.8	3.1	0.4	0.3	0.4	0.8	0.7	0.9	0.4	2
FBgn0031542	0.6	3.7	3.6	1.7	0.7	0.3	0.3	5.1	1.1	1.8	0.5	1.8
FBgn0033982	0.4	1	2.7	5.9	2.3	0.3	0.2	0.3	3.3	0.2	0.2	1
FBgn0032593	0.2	0.3	0.5	0.3	0.2	0.3	3.4	0.6	0.2	0.5	0.2	0.4
FBgn0036491	0.2	0.3	0.7	0.5	0.4	0.4	11.3	0.9	0.5	2.1	0.4	1
FBgn0039273	0.8	0.6	0.5	0.5	0.5	2.8	0.6	0.7	0.1	0.2	0.6	0.4
FBgn0037483	0.3	0	0	0.1	0.1	0	15.6	0.1	0.2	1.5	0.3	0.1
FBgn0004102	9	4.9	0.2	0.4	0.5	0.3	0.9	0.8	0.5	0.7	2.7	0.1
FBgn0023170	0.8	1.1	1.2	1.2	1.3	0.9	0.4	2.2	1.2	1.8	1.2	1.5
FBgn0025866	1.9	1.3	0.9	1.4	1.7	1.7	0.7	0.7	0.4	0.2	2.1	0.8
FBgn0025574	2.9	2.1	1	1.1	3.2	1.2	0.3	1.9	10.4	5.8	2.3	1.1
FBgn0034179	1.3	3.1	0.4	2.2	1.2	0.9	0.2	0.9	1.1	1.1	1.7	2.8
FBgn0038720	1.1	1.1	0.2	5.4	3.7	0.6	0.8	0.5	12.6	0.2	1.3	1.9
FBgn0032090	0.1	0	0.1	0.1	0.1	0	12.1	0.2	0.1	1	0.1	0.2
FBgn0030634	27.2	6.4	2	2	0.5	0	0.3	0.5	0.5	0.4	23	1.2
FBgn0011603	4.2	2.5	0.9	29.1	5.3	0	0.1	0.3	2.2	0	11.2	2
FBgn0003016	1.1	1.4	0.3	0.9	0.8	2.6	0.5	0.6	1.4	1.5	1.8	1
FBgn0004372	0.3	0.2	0.6	0.2	0.5	0.1	4.2	0.3	0.3	1.5	0.4	0.5
FBgn0038088	0.8	2.1	0.3	1.6	5.6	0.1	4.8	5.8	4.5	0.6	1.3	0.9
FBgn0038397	0.3	6.7	0.3	0.3	0.5	0.3	2.5	0.4	0.2	1.4	0.7	1.3
FBgn0024244	0.1	0.6	2.7	11.2	2.7	0	0.2	0.2	2.9	1	0.3	0.6
FBgn0032783	0.1	1.8	0.3	1.9	0	1.3	0	0.5	0	0	0.1	2.2
FBgn0034379	1.7	0.9	0.8	1	0.5	1.6	1.5	1.1	1	1.3	1.5	0.7
FBgn0037280	1	4	1.6	0.6	2	0.5	0.7	4.7	1.7	0.6	0.6	2.2
FBgn0000578	3.3	0.8	0.8	1.1	1.5	2.9	0.7	0.5	1.2	0.3	2.5	0.6
FBgn0011642	3.9	1.7	1	0.9	1.5	1.2	0.7	1	1.6	1.3	3.7	0.9
FBgn0031760	2.5	3.6	1	3.4	2.2	1.6	3.7	2.4	7.9	2.7	2.4	0.8
FBgn0015376	0.1	0.1	0.1	0.1	0.1	2.6	0.9	0.1	0.1	0.2	0.1	0.1
FBgn0003028	0	0.1	0	0.4	0.1	2.9	0	0	0	0	0	0.2
FBgn0015622	1.2	1.6	1.6	1.1	1.1	1.3	2.1	5.2	2.7	1.7	1.5	1
FBgn0051601	0.2	0.1	0.1	0.1	0.1	0.1	11.2	0.2	0.1	2.7	0.3	0.2
FBgn0032694	1	1.4	2.2	4.9	1.3	0.8	0.4	1.1	0.6	0.9	1.1	1
FBgn0051044	0.5	0.8	1.3	1.3	2.1	1.1	0.6	6.4	2.9	2.7	1	1.5
FBgn0039812	0.1	0.1	0.3	0.3	0.3	0.2	11.5	0.1	0.3	0.9	0.2	0.4
FBgn0038339	0.5	0.7	0.9	0.5	1.2	0.2	0.4	1.2	1.1	1.1	1.1	2.1
FBgn0029898	0.3	4.5	0.7	0.7	0.1	0	0.1	0	0	0.1	0.1	8.1
FBgn0028879	22.3	6.2	0.2	0.2	0.2	0	0.2	0.1	0.2	0.3	21	0.8
FBgn0010329	13.4	2.6	1.1	1.1	1	0.6	1.4	0.6	0.7	1.4	17.6	1.5
FBgn0004607	11.2	2.8	0.8	0.8	0.5	0.2	0.2	0.6	0.3	0.9	7.9	0.2
FBgn0032633	2.1	0.8	1.9	0.3	0.4	2.5	0.7	0.4	0.2	0.4	2	0.3
FBgn0053558	1.4	1.2	1.1	1.6	1.3	1.4	0.8	1.7	1.3	2	1.7	1.8
FBgn0030596	0.1	0.1	0.1	0.1	0.2	1.3	0.1	0.2	0.2	0.2	0.1	0.2
FBgn0038894	1	2.7	0.9	0.7	0.7	0.3	0.3	1.6	0.4	0.8	1.1	3.3
FBgn0014018	0.5	1.8	2.1	2.9	3.1	0.8	0.2	1.5	1.6	2.7	0.6	1.7
FBgn0000097	1.1	1.1	2	1.2	1.2	2.3	0.2	1.1	1.1	1.4	1	0.9
FBgn0052107	0.1	0.2	9.5	3.4	14.8	0.1	0.1	0.3	3.7	0.2	0.1	0.3
FBgn0027356	3	1.7	0.5	4.1	2.4	0.6	0.2	0.8	0.8	0.4	3.4	1.8
FBgn0039589	1	0.5	0.5	0.6	0.4	3.4	0.5	0.8	0.7	1	0.9	0.4
FBgn0038638	0.4	0.2	8	1.2	9.3	0.3	1.3	0.1	8.4	0.3	0.4	0.2
FBgn0026255	0.1	1.2	0.2	1.1	0.2	0.1	0.9	0.2	0.1	0.3	0.2	4
FBgn0016694	7.7	3.4	0.7	2.3	0.9	0.2	0.2	0.8	0.2	0.1	8.2	1.8
FBgn0032439	0.2	0.3	0.5	0.3	0.4	0	14.8	0.4	0.4	3.9	0.3	0.8
FBgn0004514	27.9	6	0.1	0.8	0.5	0.7	0.2	2.4	1	0.3	26.8	0.9
FBgn0000577	1.2	1.8	0.1	0.3	0.5	0.2	0.3	0.6	0.1	0.8	3.6	0.6
FBgn0005672	4.2	2.3	1.2	1.3	1.4	1.3	0.8	0.8	1	3.8	5.5	0.9
FBgn0010434	4.1	2.5	1.5	2.1	0.4	0.4	0.4	1.7	0.6	0.6	4	2.4
FBgn0039067	1.3	0.6	0.5	0.5	1.1	2.4	0.8	0.9	0.7	0.5	1.3	0.5
FBgn0003079	1.9	0.8	0.8	0.7	0.9	1.9	0.3	0.6	0.7	0.5	1.6	0.5
FBgn0038206	0.8	0.6	1.5	0.9	1.5	1.7	1	0.7	2.2	1.2	0.6	0.4
FBgn0000547	0.8	0.8	0.2	0.9	0.3	3.8	0.3	1.9	0.6	0.1	0.5	0.9
FBgn0041150	3.2	2.5	0.1	0.5	0	1.4	0.6	0.1	0	0.1	6.7	1
FBgn0036165	5.1	2.2	1	2.9	0.5	1.5	0.4	1.2	1.1	0.3	7.3	2.1
FBgn0261041	37	6.6	0.1	0.1	0.3	0.1	0.3	0.5	0.1	0	36.5	0.5
FBgn0027287	0.8	0.7	2.1	2.8	1.7	1.3	1	21.7	8.3	0.9	0.9	0.9
FBgn0019890	4.4	1.5	1	1.2	1.9	1	1.9	1.5	2.6	1.5	3.7	1.6
FBgn0036493	0.5	0.6	3.7	3.2	4.6	0.5	0.6	5.1	3.8	3	0.5	1
FBgn0001134	4.8	0.9	0.6	0.9	0.8	0.4	0.6	2.4	1	0.9	1.5	1.3
FBgn0032078	1.8	0.9	1.8	0.5	1.2	2.3	0.1	0.1	0.7	0.6	2.2	0.4
FBgn0024371	0.4	0.3	0.4	0.5	0.5	2.5	1.1	0.7	0.5	0.5	0.4	0.3
FBgn0020278	1.5	1.5	1.4	1.3	1.5	1.6	0.8	1	1.8	1.6	2.5	1.3
FBgn0001137	0.1	1.1	0.2	2.2	0.1	1.4	0.2	0.8	0.3	0.2	0.1	2.3
FBgn0042126	0.3	0.6	3.6	2.1	2.2	0.3	5.4	1.1	0.4	1.7	0.5	0.6
FBgn0040371	0	0	0	0	0	0	7.6	0	0	1	0	0
FBgn0051099	0.1	0.2	0.2	0.2	0.2	0.1	12.7	0.3	0.3	1.2	0.1	0.3
FBgn0002922	0.2	1.1	1.5	0.3	0.6	0.2	0.2	0.5	0.4	0.5	0.9	3.5
FBgn0035674	1.2	1	1.3	2.3	3.7	1.2	0.2	0.7	1.4	0.6	1.4	1.2
FBgn0035199	0.6	0.9	0.4	8.1	0.3	0.2	1.1	1.5	0.2	0.2	0.8	2
FBgn0031568	1	0.8	0.6	1.3	0.5	0.7	0.9	1.4	0.7	0.9	1.3	1.1
FBgn0052264	5.9	1.4	0.7	1.4	0.8	1.1	1.7	0.9	1	0.4	5	0.9
FBgn0004516	12.9	5.8	0	0	0	0	0	0	0	0	19.6	0.3
FBgn0039900	31.1	9.7	0.1	0.2	0.1	0.1	0	1.6	0.1	0.2	19.1	0.4
FBgn0014469	0.1	2.2	1.3	2.3	7.5	0.8	0.1	1.4	4.2	5.4	0.1	2.2
FBgn0051646	40.5	9.2	0.1	0.3	0.3	0.1	0.2	1.2	0.2	0.4	36.7	0.6
FBgn0260945	3.9	1.7	1.2	1	1.4	1.6	0.3	0.5	2.2	2.2	3.8	1.6
FBgn0037736	38.5	7	0.3	1	0.7	0.5	6.8	0.5	2.9	2.3	17.7	1.1
FBgn0034058	0.5	0.8	2.2	1.8	1.7	1.5	0.1	0.7	1	0.7	0.7	0.9
FBgn0050361	30.6	4.2	1.6	0.3	0.6	0.1	0.2	0.9	0.9	1	22.3	1.9
FBgn0052413	0.4	0.3	0.4	0.2	0.3	0.1	0.7	77.4	0.3	0.5	0.9	0.6
FBgn0036116	11.7	4.7	0	17.5	0.5	0.9	0.1	0.3	5.3	0	16.3	0.8
FBgn0022787	3.3	1.4	1	1	1.5	1.4	1.6	3	1.4	2	3.1	1.1
FBgn0035237	7.2	1.9	0.5	1	0.2	1.4	0.7	0.6	0.1	0.2	6.6	1.7
FBgn0053296	23	8.9	0.8	1.3	0.8	0.1	0.1	0.6	0.6	0.3	51.4	10.8
FBgn0053489	0.1	0.1	0.1	0.2	0.1	0	16.7	0.2	0.1	1.6	0.1	0.1
FBgn0053986	0.6	0.7	1.2	1.2	1	0.4	0.5	3.5	0.4	1.3	0.8	1.1
FBgn0000633	35.9	7.3	0.4	0.3	0.4	0.1	0.3	0.4	0.3	0.3	41.5	0.5
FBgn0017418	1.7	0.7	0.5	0.7	0.2	2.8	0.5	0.3	0.8	0.9	0.6	0.7
FBgn0029167	1.7	4.5	0.2	0.1	0.2	0.1	0.5	0.2	0.6	0.9	0.7	4.5
FBgn0051092	1.1	0.5	0.3	1.4	0.1	0.2	0.1	0.1	0	0	1.1	2.8
FBgn0034322	0.1	0.1	0.1	0.1	0.2	0.4	0.5	0.4	0.3	0.3	0.2	5.1
FBgn0032136	0.5	3	0	0.4	0.1	0	0	0	0	1.5	0.4	4.7
FBgn0040823	7.2	1	1.6	0.9	1.1	1.5	0.4	1.1	1.4	1.3	4.2	1.1
FBgn0038256	0.6	1.1	0.2	1	0.7	1.5	0.2	0.1	0.1	0.3	0.7	2.2
FBgn0034113	1.9	1	0.9	1.2	1	2.2	1.2	1.2	1.3	0.9	1.7	0.8
FBgn0038029	3.1	7.1	0.6	4.8	0.5	0.2	0.4	0.7	0.4	0.5	0.3	1.4
FBgn0011589	5.7	1.5	2.4	1.2	0.4	0.4	1	2.6	1.3	0.9	3	1.9
FBgn0051496	0	0	0.2	0.1	0.1	0	0.2	76.4	0	0.3	0.1	0.1
FBgn0040283	1.5	1.1	1	1	0.7	2.4	0.5	1.1	0.8	0.8	1.1	0.8
FBgn0038190	0	0	0.1	0	0	2.6	0.5	0	0	0.1	0	0.1
FBgn0036731	0.1	0.1	0.2	0.1	0.2	0	10.3	0.1	0.1	0.8	0.1	0.2
FBgn0260442	1.5	1.2	1.3	1.9	1.4	1.1	0.5	1	2.1	1	3.3	1.5
FBgn0259685	0.3	1.6	1	1.9	0.5	2.1	0.3	0.8	1	0.2	0.1	0.8
FBgn0001316	1.4	1	2.1	1.8	1.1	1.3	0.5	0.8	1.1	0.8	1.5	1.2
FBgn0030160	0.3	3.9	0	2.4	0	0	0.3	0	0	4.9	0.5	3.9
FBgn0035703	1	0.6	1	0.9	0.5	1.8	0.4	0.9	1.5	0.9	0.9	0.5
FBgn0005695	0.5	0.3	0.2	0.3	0.3	2.6	0.1	0.3	0.5	0.2	0.3	0.3
FBgn0259984	2.9	0.7	0.3	1.3	2.8	2.5	0.3	1.8	1.9	4.1	2.2	0.4
FBgn0032449	1	0.6	4.5	0.5	9.7	1.8	2.4	0.5	1	1.6	0.6	0.8
FBgn0050106	2	1.1	1.5	5.2	0.3	0.3	1.3	2.6	0.3	1.4	2.9	0.8
FBgn0020445	0.5	0.3	0.2	1.2	1.3	4.3	0.1	0.3	9.2	7.5	0.6	0.2
FBgn0004852	5.6	2.5	0.7	3.2	1.9	0.1	0.1	0.6	1.3	0.1	5.3	3.1
FBgn0050046	0.5	2.6	0.1	0.3	0.2	0.7	0.1	0.1	0.9	13.2	0.3	3.1
FBgn0067779	1.1	0.8	0.7	0.9	0.6	2.7	0.3	1.7	0.7	2.8	0.9	0.9
FBgn0027578	0.2	5	0	0.4	0.1	0.1	0	0	0.1	24.3	0.2	5.5
FBgn0004606	3.3	1.4	0.1	0.5	0.2	1.5	0.3	0.2	0.6	6.5	4.4	1.3
FBgn0033108	52.4	11.6	0.2	0.2	0.2	0	0.3	1.5	0.2	0.1	17.4	0.3
FBgn0040350	0.2	0.5	1.4	0.9	34.3	0.3	0.6	0.7	58	1.1	0.5	1.2
FBgn0021764	1	0.6	0.5	0.7	0.2	4.2	0.4	1.7	0.6	0.4	0.5	0.5
FBgn0004646	3	2.2	0.3	1.5	0.1	0.5	0.5	2.5	0.1	0.4	3.2	1.2
FBgn0010238	0.7	1.4	0.1	1.9	0.1	1.3	0.6	1.6	0	0.5	0.4	1.1
FBgn0028397	7.7	1.3	0.6	2.8	1.6	1.1	5.3	0.3	0.3	0.4	6.6	1.2
FBgn0024291	1.4	0.9	0.7	1	0.9	1.9	0.1	0.8	0.8	0.3	1	0.5
FBgn0052085	8.4	2	0.3	0.3	0.3	0.2	8.4	1.7	0.3	2	7.8	1
FBgn0032167	0.1	1	5.2	2.7	1.2	0.3	0.2	0.1	2.8	0.9	0.1	1.2
FBgn0036948	0	0	12	0.8	0.1	0	0.1	0	0.8	0	0	0
FBgn0038527	1.4	2.1	1.4	1.4	1.6	0.7	0.9	1.6	0.7	1.8	1.4	2.6
FBgn0030706	31.6	8.5	0	0	0.1	0	0	0.1	0.1	0	27	0.2
FBgn0025373	0.5	0.4	2.6	2.8	2.9	1.4	1.5	0.9	5.9	1.5	0.4	0.4
FBgn0031752	1.6	1.4	1	1.4	0.8	1.1	0.5	1.4	1.9	1.5	1.4	2.3
FBgn0034730	1.5	0.5	3.2	20.3	3.5	0.9	1.9	2.1	7.6	2	1.1	2.6
FBgn0033720	0.1	0.3	3.5	16.7	7.6	0.1	0.3	0.2	14.8	0.1	0.2	0.1
FBgn0052529	6.8	2	2.2	2.7	2.8	1	0.2	1	2.1	0.6	4.4	1.9
FBgn0033015	1.7	0.7	0.4	0.5	0.7	2.1	1.6	0.6	0.5	0.6	1.4	0.3
FBgn0039492	1.1	0.9	1.6	1.8	2.2	2	0.3	1.9	1.9	0.2	0.9	0.6
FBgn0024315	1.8	1.5	3.5	7.1	7.7	0.4	0.3	0.2	6.3	0	2.3	0.6
FBgn0053642	0.9	1.1	0.8	1.1	0.9	0.6	0.4	1.9	1.4	1.2	1.4	0.8
FBgn0034935	15.1	5.2	0.4	0.1	0.3	0	0.1	0	0.5	0.1	28	0.5
FBgn0034659	0	0	0	0	0.1	0	13.1	0.1	0	2.9	0	0.1
FBgn0033481	1	0.9	1.3	1.8	1.5	0.6	0.7	3.2	0.6	2	1.1	1.9
FBgn0003301	4.7	2.5	1.5	2.5	0.8	0.9	0.5	0.5	1	0.9	3.1	2
FBgn0050089	0.5	0.5	0.8	1.1	0.6	0.5	0.8	0.8	0.7	1.5	1	1.2
FBgn0036126	1.6	1.7	1	1.7	1.6	1.1	0.3	1.5	2.5	1.3	1.6	1.4
FBgn0037766	20.5	4.8	0.6	1.1	0.9	0.5	1.1	2.2	0.5	0.7	11.9	1.8
FBgn0052580	0.3	0.6	4.7	0.3	0.5	0.3	2.2	141.9	0.2	0.6	0.4	0.3
FBgn0039776	2.3	1.5	0.5	2.1	1.3	0.9	0.4	10.4	2	2.1	2.8	1.9
FBgn0031887	0.5	0.7	1.5	0.6	0.4	0.2	0.6	1.4	0.4	0.7	0.5	2.2
FBgn0015229	2	0.9	0.5	0.6	0.1	2.5	0.1	0.7	0.8	1.2	1.1	0.6
FBgn0036814	2.9	0.9	0.6	1.1	0.5	3.1	2.3	0.8	2	2	1.9	0.8
FBgn0039923	1.4	0.6	0.6	0.6	0.7	1.9	0.4	0.8	0.8	0.8	1.3	0.4
FBgn0035023	19	6.2	0.7	1.4	1.6	0.1	0.2	0.6	2.2	0.3	3.3	2.4
FBgn0028481	40.4	6.7	0.1	0.1	0.1	0.1	1.1	0.5	0.1	0.2	22.7	0.3
FBgn0038893	2.4	1.3	0.8	0.9	1.1	1.6	0.1	0.9	0.9	0.6	3.1	1.3
FBgn0259677	0.8	0.9	1.9	1	1.5	0.7	0.9	2.2	1.4	1.7	1	1.4
FBgn0039928	5.8	3.3	0.8	2.6	2.3	0.3	0.3	3.4	1.8	1.5	5.2	1.2
FBgn0039070	0	0	0	0	0	0	14	0.1	0	1.2	0	0.1
FBgn0038852	0.4	0.4	0.7	0.5	0.5	0.5	0.3	0.6	0.3	0.6	0.2	0.4
FBgn0035888	4	1.7	0.1	3.1	0	1	2.6	0.6	0	0.6	2.8	1.2
FBgn0259736	0.9	1.4	0.6	2.9	0.2	0.1	0.2	0.6	0.1	0.2	1.4	3.3
FBgn0032940	1	0.9	0.8	0.8	6.1	1.3	0.4	2.1	2.4	2.1	0.9	1.8
FBgn0030976	1.2	1.3	0.4	1.8	0.1	0.1	0.1	0.4	0.1	0.1	1	3.6
FBgn0052698	0.5	2.2	0.3	0.3	0.2	0.2	0	0.1	0.1	32	0.4	3.5
FBgn0052112	2.7	1	0.5	1.2	1.1	0.8	4.2	0.4	0.4	0.6	2.6	1.2
FBgn0039633	1.1	0.2	0.2	0.3	0.2	5.1	1.9	0.3	0.4	1.4	0.6	0.2
FBgn0037409	0.4	3.3	1.1	6.7	0.7	0.2	3.4	0.5	0.3	0.4	1.1	0.8
FBgn0052365	0.4	0.3	0.5	0.3	0.2	3	0.3	2.4	0.2	0.2	0.2	0.1
FBgn0033434	1.8	1	4.4	2	0.6	0.8	2	3.4	1.4	1.2	1.5	0.8
FBgn0034262	1.5	0.8	0.5	19.4	19.1	0.6	0.4	0.6	9.3	0.9	1.6	0.4
FBgn0002778	1.5	0.6	0.1	0.2	4.2	1.8	0.1	0.1	0.8	0.2	2.6	0.9
FBgn0033403	1.3	0.6	0.5	1.2	0.4	0.2	0.2	0.7	0.7	0.4	1.4	1.1
FBgn0034546	0	0	0	0	0	0	12.6	0	0	1.2	0	0
FBgn0005558	22	6.2	0.5	0.4	0.2	0.3	0.4	0.3	0.2	0.9	7.4	0.3
FBgn0036058	1.9	1.4	1.1	1.3	1.9	1.8	0.5	1.4	2.9	3.1	2.6	1
FBgn0037408	9.7	2.2	2.4	1.3	12.2	0.4	1.6	0.9	5.1	1.2	7.5	1
FBgn0010228	2.4	1.9	0.6	0.8	0.2	0.4	0.2	2.8	0.6	0.6	2.4	1.7
FBgn0013759	7.7	1.8	0.9	1.6	1	2	0.1	0.8	1.2	0.5	7.5	0.5
FBgn0038494	19.7	4.2	0.6	0.9	0.3	0.1	0.2	0.8	0.3	0.4	11.6	1
FBgn0041723	20	6	0.4	0.3	0.3	0.5	0.6	0.3	0.3	0.2	16.1	0.6
FBgn0025641	4.7	2.4	0.1	0.1	5.7	2.2	0.3	0.1	7.5	0.1	2.5	0.3
FBgn0058191	0.9	0.8	0.6	0.9	1.1	1.9	0.6	2	1.1	0.9	0.8	0.6
FBgn0035204	2	0.8	1	0.6	2.1	1	1.9	0.2	0.2	7.5	2.5	0.8
FBgn0033983	5.6	2.5	3.2	8.7	0.2	0.1	3.5	0.1	0.1	0.8	5	0.3
FBgn0040719	0.2	0.2	0.3	0.2	0.1	0.1	9.8	0.3	0.2	2.2	0.2	0.3
FBgn0036663	6.2	4.2	0.7	2.4	0.3	0.3	0.3	4.4	1.3	0.7	8.2	1.2
FBgn0036278	0.8	1	0	0.1	0.1	0	0	0	0	0.1	0.5	5.6
FBgn0037443	1.8	1.6	1.1	0.7	0.7	1.5	0.3	1.3	1.8	1.7	1.5	1.9
FBgn0020386	1.3	1.5	1.3	1.2	1.4	1.6	0.1	0.4	2.6	1.4	1.1	1.4
FBgn0031558	0.1	5.9	0	0.3	0.1	0	0	0	0.2	27.2	0.2	4.6
FBgn0034031	0	0	10.5	2.5	6.7	0	2.3	0	2.1	0.2	0	0
FBgn0002719	0.5	1.7	0.6	1	2.2	0.5	0.9	0.3	1.2	0.5	0.6	3.1
FBgn0035554	0.4	0.5	0.8	1.1	0.9	0.3	0.5	1.7	0.7	1	1.2	1.4
FBgn0014073	0.1	2.4	0.6	6	0.2	0.5	1.5	6.7	0.1	0.2	0.3	1.6
FBgn0011582	123.2	7.8	1.5	2.1	3.6	1.1	3	2.7	2.8	3.6	40.7	2.2
FBgn0027866	1.4	0.7	0.6	1	0.9	1.7	1.6	2.5	0.6	0.7	1.1	0.7
FBgn0003255	6	2.6	0.4	0.3	1	1.7	0.9	0.3	1.9	47.3	8.2	2.3
FBgn0036833	0	0.3	11.6	0	0	0	0	0	0	0	0	0.1
FBgn0032395	2.7	1.2	1.6	1.4	1.7	1.7	0.6	1.3	1.1	1.4	2	1.5
FBgn0039420	9.7	1.6	0.6	0.5	0.8	0.6	7.4	0.7	0.7	0.6	6.6	1.2
FBgn0000163	0.3	1.3	1.7	2.6	0.7	2.1	0.5	0.7	0.8	0.2	0.1	1.2
FBgn0053147	21.5	3.6	0.8	0.2	0.2	0	0.1	0.2	0.2	0.2	15.1	0.8
FBgn0041004	0.9	0.7	0.7	0.7	1.5	2.2	0.2	0.5	1.2	0.8	0.6	0.6
FBgn0015519	33.8	5.5	1.5	3.5	1.1	1.5	1.5	9.8	1	0.9	38.6	7.6
FBgn0036781	0.9	1.1	0.5	1.1	0.9	0.6	0.5	1.4	0.7	0.9	0.9	1.4
FBgn0000449	0.5	0.3	2.3	0.2	0.4	0.7	0.3	0.4	0.6	1.3	0.5	1.4
FBgn0051475	17.3	4.4	0.2	0.6	0.3	0.2	2	3.3	0.3	0.9	15.9	1.3
FBgn0010660	1.1	0.5	0.6	0.6	0.8	2.2	1.1	0.8	0.6	1.6	1	0.6
FBgn0010113	2.1	0.6	0.7	0.9	0.3	2.4	1.4	1.3	0.3	0.4	2.6	0.5
FBgn0039472	0	0	5.3	0	0	0	0	0	0	0	0	0
FBgn0038237	7.3	2.5	0.5	2.1	2.1	0.1	0.1	1.4	0.3	0.3	8.9	1.3
FBgn0027553	0.8	0.6	0.7	0.7	0.7	2.1	0.3	1	0.6	0.6	0.9	0.6
FBgn0039620	0.1	2.3	2.8	9.4	0.1	0	0.1	1.8	0	0	0.1	1.6
FBgn0038246	35.1	9.8	0.1	0	0.1	0.1	0.1	0.4	0	0.1	16.6	0.4
FBgn0028546	0.7	0.7	1.4	1.8	1.5	1.7	0.2	0.9	2.9	1.2	0.6	1
FBgn0040070	0.8	1.3	1.5	1.4	2.8	1.1	0.2	3.1	1.1	1	0.9	1.3
FBgn0035490	0.6	1.5	0.5	4.8	0.3	0.2	0.2	0.1	0.1	0.1	0.3	2.9
FBgn0030569	0.1	0.5	2.3	1	0.2	0.1	0.1	0.4	0.2	0.4	0.5	0.5
FBgn0036316	1.5	1	0.8	0.6	0.4	1.4	0.3	0.6	0.2	0.9	1.4	2.2
FBgn0029666	1.1	0.5	0.3	0.4	0.7	1.8	0.9	0.5	0.4	0.5	1	0.4
FBgn0004876	4.8	3.8	2.7	1.7	0.9	0.1	0.2	1.1	1.1	0.1	4.4	0.9
FBgn0021768	0.2	0.4	0.5	0.3	0.5	1.6	2.4	0.7	1.5	1	0.3	0.4
FBgn0034742	3.2	0.7	0.8	0.8	0.6	1.2	0.5	2.8	1	1.2	1.9	0.5
FBgn0003256	1	0.7	1.2	0.7	1	2	0.2	1.5	1.4	1	0.7	0.4
FBgn0039131	0	0.6	0.1	8.2	0.1	0	0	0	0.1	0.1	0	1
FBgn0020762	3.2	2.4	1.6	0.7	0.7	0.7	1	0.5	2.5	0.5	2.9	2
FBgn0031100	17.9	3.6	1	0.8	2.1	1.1	0.8	2.1	1.6	5.5	18.6	2
FBgn0033902	1.3	1.3	1	1.6	1.2	1	0.4	2.6	1.3	1.4	1.7	1.1
FBgn0038295	7.4	3	0.9	1.1	0.6	0.7	2.3	1.2	0.4	0.6	7.4	1.7
FBgn0031936	0.3	6.1	0.2	0.8	0.4	0	0.1	0.2	0.4	0.3	0.8	10.1
FBgn0034883	0.1	0.2	4.8	0.6	16.3	0	0.1	4.5	1.2	0.1	0.1	0.3
FBgn0038654	0.2	6.1	0.1	0.3	2.1	0.1	0	0.2	0.2	0.1	0	2
FBgn0035194	0.1	0.3	0.4	0.5	0.3	2	0.7	0.3	0.6	0.3	0.1	0.3
FBgn0037551	1.8	1.3	1.1	1.4	0.5	1.6	0.6	0.8	2.6	2.4	1.7	1
FBgn0032614	0.2	0.5	1.6	1.9	2.7	0	0	4.1	0.1	0.1	0.3	5.7
FBgn0040233	1.1	0.5	0.3	0.4	0.4	2.3	0.3	0.4	0.4	0.4	0.8	0.4
FBgn0052666	1.5	0.8	0.9	1	1.2	1.7	0.2	0.8	0.7	0.8	1.1	1
FBgn0033730	0.2	18.5	0.3	0.7	0.3	0.2	0.2	0.3	0.6	0.7	0.3	0.6
FBgn0034506	0.3	0.3	0.2	0.2	0.2	0.2	13.7	0.1	0.2	2.1	0.2	0.6
FBgn0001325	2.6	0.7	0.2	0.7	0.6	0.3	0.6	1.1	0.9	105.3	3	0.8
FBgn0036329	0.1	0.1	0	0	0.1	0.1	16.4	0.1	0.1	1.1	0.1	0.1
FBgn0032083	2.5	6.9	1.4	0.9	1.4	0.2	1.4	0.6	0.9	1	1.2	1.6
FBgn0036443	0	0	0.1	0	0.1	0	12.5	0.1	0	2.3	0	0.1
FBgn0016641	3.9	1.4	0.4	1.1	0.4	2.7	0.3	0.9	0.5	0.6	2.8	1.2
FBgn0032452	0.8	1	0.6	1	1.3	1.2	1.6	1.3	0.8	0.9	0.8	0.9
FBgn0052103	1.3	1.3	1.7	2	7.2	1	0.6	0.4	0.7	2.9	2.1	1.8
FBgn0011260	1.1	0.6	0.3	0.1	0.1	1.6	0.1	0.1	0.2	0.2	0.7	0.4
FBgn0050055	1.4	0.9	0.6	1	0.5	2.3	0.1	1.5	0.2	0.2	0.9	0.9
FBgn0031683	4.1	1.2	0.9	0.7	0.6	0.5	4.1	0.3	0.7	0.8	2.7	0.8
FBgn0040370	13.5	3.4	0.8	0.3	1.1	1.5	7.6	3.6	0.5	1	3.8	2.9
FBgn0029996	0.8	0.7	0.8	0.7	0.7	1.9	0.1	0.6	1.4	1.2	0.6	1.1
FBgn0003969	1.6	0.7	0.7	0.6	0.3	2.5	0.3	1.9	1	1	1.3	0.3
FBgn0033028	2.1	1.2	1	0.9	1.1	1.7	1.1	0.8	1.8	1.6	1.9	0.9
FBgn0039925	18.6	5	0.9	2.5	2.7	0.2	1.3	6.9	0.4	1	15.7	2.6
FBgn0035902	1	0.6	0.5	0.7	0.4	2.2	0.5	0.7	0.7	0.6	0.7	0.4
FBgn0000721	0.2	1.1	0.8	0.7	0.6	1.4	0.2	0.9	0.2	3.1	0.3	1.7
FBgn0036230	0.6	0.9	2.5	1.1	1	0.6	0.9	1.2	1	1.4	1.2	2.4
FBgn0031710	2	1.1	1.1	1.7	1	1.8	1.2	2.5	1.6	2.2	2.3	1.3
FBgn0035298	0.3	1	0.9	2.7	9.5	0.6	0.1	0.3	1.5	0.2	0.3	2.1
FBgn0051424	1.5	1.4	0.8	4.2	4.4	1	7.4	5.3	3.3	3.8	1.4	5.5
FBgn0051028	0.8	4.4	0.8	6.1	0.6	0.7	2	0.4	0.5	0.6	0.3	2.6
FBgn0039617	30.6	6.2	0.3	0.3	0.8	0.6	0.4	2	0.7	0.5	30.3	0.8
FBgn0028645	33.7	6.8	0.2	0.1	0.3	0.6	0.1	0.8	0.3	0.3	26.3	0.1
FBgn0004611	8.4	2.1	0.7	2.3	2.1	0.8	0.2	1	0.7	0.8	4.8	1.5
FBgn0000490	0.7	2.2	1.8	2.1	0.5	0.4	1	3.9	0.1	0.6	0.9	1.8
FBgn0035041	17.3	3.8	0.3	1	0.2	0.1	0.1	3.8	0.5	12.9	20.6	0.3
FBgn0051774	60.8	8.2	0.8	0.6	1.2	0.8	0.8	1.1	1.6	1.2	41.4	0.8
FBgn0260446	8.1	2.9	0.4	1.2	1.2	0.3	2	1.2	1.4	2.3	5.9	1.9
FBgn0033752	0.9	0.9	0.8	1.1	1.2	2.2	0.8	1	1.4	0.9	0.9	0.8
FBgn0037842	0.5	0.9	1.5	0.8	0.7	1.2	0.6	0.5	1.9	1.6	0.4	1.2
FBgn0003463	1.7	2	0.5	2.3	0.4	0.2	0.9	2.2	0.8	0.2	2.6	3
FBgn0003482	0.2	0.4	0.9	0.7	0.6	2.9	0.5	0.2	0.2	0.4	0.3	0.5
FBgn0052373	0.5	0.8	0.9	0.3	0.2	1.4	0.5	0.2	0.3	0.7	0.8	0.1
FBgn0035192	0.2	1	1.7	4.2	0.3	0.7	0.4	4.5	1.9	0.4	0.3	0.9
FBgn0033368	35.6	8.9	0.1	0.2	0.2	0.1	0.2	0.1	0.3	0.5	33.1	0.4
FBgn0033043	0.6	6.1	0.5	0.3	0.4	0.3	0.9	1.2	0.7	1	0.9	1.3
FBgn0031857	0.1	1.5	0.2	1	0.1	0.1	0.1	1.1	0	0.1	0.2	4.6
FBgn0033762	2.2	1.4	0.8	1	1.5	1.5	0.6	0.6	1	0.6	2.7	1.1
FBgn0032481	0.6	0.2	0.2	0.2	0.2	0.7	7.8	0.3	0.2	0.9	0.3	0.2
FBgn0039277	21.4	7.9	1.1	2.2	0.2	0.1	0.5	1.4	0.4	0.3	21.9	1.2
FBgn0033589	0.4	0.4	1	1	0.6	0.9	1.4	0.8	1.2	0.7	0.9	2
FBgn0001083	0.5	3.6	0.4	1.3	0.7	0.1	0.2	0.4	0.5	0.4	0.7	2.8
FBgn0087040	0	0	0	0	0	1.7	0	0	0	0	0	0
FBgn0051510	1.4	0.8	0.6	0.5	0.4	2.6	1.5	0.9	0.4	0.6	1.1	0.5
FBgn0004169	0	0.7	0.6	4.1	0.1	0.1	0.2	0.8	0	0	0.1	2.3
FBgn0086676	0.7	1.4	0.7	1.6	0.9	1	0.3	0.5	0.3	0.3	0.9	1.9
FBgn0029824	1.8	1.1	0.7	1	0.7	1.6	0.3	1	0.3	0.5	1.1	0.8
FBgn0052751	0	0.1	8.5	0.1	0.2	0	0	0.1	0.2	0.3	0.1	0.1
FBgn0051141	0.1	0.1	0.1	0.1	0.1	0.1	8.2	0.1	0.1	0.9	0.1	0.2
FBgn0033867	1	1.7	3.8	8.8	1.3	0.7	0.6	55.1	0.8	0.9	2.2	2.6
FBgn0051810	0.1	0.6	6.7	16.1	0.2	0.1	0.1	0.1	0.1	0.2	0.2	1.2
FBgn0038149	0.2	1	0.1	1.3	0	1.5	0.3	1.1	0	0.1	0.2	0.5
FBgn0054031	0.7	0.5	0.5	4.2	0.4	0.8	2.7	1.4	0.4	0.7	1	0.9
FBgn0032827	0.6	0.7	0.8	0.8	0.6	0.7	3	1.2	0.9	1	0.6	0.6
FBgn0039709	0.1	1.1	0.2	0.8	0.1	1.5	0.1	0.1	5	0	0	0.8
FBgn0036796	0.1	0.1	0.1	0.1	0.1	0	0.1	90.1	0.1	0.1	0.1	0.2
FBgn0034700	0.3	0.4	0.2	0.2	0.2	0.3	8	0.3	0.5	2	0.4	0.4
FBgn0023524	35.7	6.1	0.2	0.4	0.2	0.1	0.1	0.5	0.2	0.1	49.3	0.8
FBgn0032048	23.8	6.2	2.9	0.4	0.1	0	0	0.1	0	0.2	35.4	0.5
FBgn0028892	0.1	0.1	0	0.1	0.1	0	11.8	0.2	0.1	1.2	0.1	0.2
FBgn0015546	0.4	0.4	0.3	0.5	0.6	2.8	0.3	0.2	0.3	0.1	0.5	0.4
FBgn0039054	29.7	7.9	0.1	0.3	0.4	0.1	0.1	0.4	0.6	0.2	16.1	1.7
FBgn0260798	3.1	1.7	0.5	1	0.6	1.9	0.3	0.9	1	0.7	2.8	0.7
FBgn0001114	0.3	4.9	0	0.2	0.1	0	0.1	0	0.1	9.1	0.2	5.3
FBgn0038853	6.7	1.9	0.2	0.3	0.3	2.4	0.3	0.2	0.7	3.1	7.9	0.6
FBgn0032656	4	1.1	0.8	0.9	0.9	2.4	0.4	1.5	1.8	1.7	4.1	0.6
FBgn0030798	0.2	2	0.3	1.2	0.2	0.2	0.1	0.5	0.2	0.1	0.3	3.2
FBgn0053126	0.6	1.2	3.5	2.4	4	0.2	0.6	1.5	0.4	3.5	1	1.5
FBgn0015400	16.8	2	0.5	0.5	0.8	0.3	0.3	0.6	0.3	0.6	11.8	1.1
FBgn0038652	0.1	1.2	2.3	0.7	21.3	0	0.2	0.2	2.1	0.5	0.2	2
FBgn0032161	0.1	0.7	1.1	1.6	3	1.8	0.2	0.6	0.8	0.7	0.2	0.9
FBgn0031888	0.7	1.7	0.9	1.8	2	0.2	2.1	0.4	3.9	1.2	0.3	1.8
FBgn0000183	0.8	0.7	1.5	1.5	1.2	2.5	0.2	1.4	2.2	0.2	0.5	0.5
FBgn0052240	0	0	0	0	0	0	9.1	0	0	1	0	0
FBgn0001233	0.6	0.6	0.6	0.7	1.5	1.1	0.9	1.1	0.9	0.9	0.8	1
FBgn0051789	1.5	0.6	18.2	2.2	1.1	1.3	1.5	0.7	0.6	48.6	1	0.6
FBgn0010395	0.2	0.2	7.9	3.5	8.5	0.5	0.1	6.5	3.6	0.2	0.4	0.2
FBgn0023214	0.3	1.5	2.1	1.7	1.6	0.4	0.6	4.3	2	1.9	0.9	1.8
FBgn0004620	2.3	1.2	1.2	4	2.3	0.2	0.7	1.7	3.4	0.4	1.6	1.9
FBgn0034530	0.2	1.2	0.4	10	0.4	0.3	0.9	0.3	0.3	0.4	0.3	1.4
FBgn0036853	1.1	0.6	0.5	0.9	0.9	1.5	0.6	0.6	0.4	0.3	1	0.6
FBgn0260243	0.5	0.2	0.3	0.2	0.2	2.6	0.1	0.5	0.3	0.5	0.4	0.3
FBgn0036638	0.4	0.5	0.6	0.7	0.5	0.3	0.4	0.4	0.6	0.4	0.5	0.6
FBgn0038201	0.3	1.8	1.3	0.9	0.6	0.6	1	0.3	0.6	0.9	1.1	4.4
FBgn0031985	2.4	1.4	1.5	1.5	1.8	1.1	0.9	3.7	1.8	0.7	2.4	0.7
FBgn0039594	0.1	2.7	0.5	6.2	0.2	0.2	0.1	0.1	0	0.2	0.1	2.8
FBgn0023395	0	0	0.1	0	0	3.5	0.8	0.1	0.1	0.3	0	0.1
FBgn0043865	0.5	0.2	1.9	0.5	0.6	0.6	8.7	0.6	0.8	2.7	0.8	0.8
FBgn0026577	0.2	1.6	1.1	1.1	1.6	0.3	3.3	0.9	0.5	1.4	0.8	0.5
FBgn0024947	1.4	1.5	2.8	1.4	4.1	1.1	0.3	3.3	3.4	1.9	2	1.7
FBgn0004880	40	7.6	0.1	0.1	0.1	0	0.1	0	0.1	0.1	36.7	0.6
FBgn0034057	1.7	0.9	2.4	1.6	1.7	1.3	0.5	0.9	1.8	1.1	1.6	1.5
FBgn0039338	2.3	0.9	0.5	0.8	0.6	2	0.8	0.9	0.8	0.6	1.9	0.7
FBgn0030890	0.5	0.6	0.6	1.9	3.7	2	0.1	0.3	3.2	0.4	0.4	0.5
FBgn0037203	0	0.2	3.1	1.2	2.1	2.1	0.3	0.1	6	0	0.2	0.2
FBgn0040571	32.4	7.4	0.2	0.1	0.5	0.2	0.2	0.5	0.2	0.3	20.3	0.6
FBgn0029662	0.5	0.4	0.1	0.2	0.3	0.7	5.2	0.5	0.3	0.2	0.3	0.8
FBgn0003567	0.5	0.4	0.4	0.4	0.7	2.7	0.6	0.6	0.8	0.5	0.4	0.4
FBgn0015513	1.1	1.1	1.6	1	1.3	2.2	0.3	0.5	0.6	1	1.4	1.3
FBgn0033862	0	0	0	0.1	0.1	0.1	13	0.1	0.1	0.7	0.1	0.1
FBgn0024804	1.8	1.1	0.8	1	1.1	1.4	0.7	1.3	3.1	1.1	1.9	0.8
FBgn0052773	0.2	0.5	0.1	0.3	0.4	2.4	0.4	0.7	0.8	0.5	0.3	0.2
FBgn0032216	0.4	0.4	0.8	0.6	1.2	1.5	0.9	0.6	2.7	1.3	0.5	1
FBgn0086677	24.4	3.3	0.5	0.9	0.9	0.5	0.3	1.4	1.1	0.7	16.9	2.6
FBgn0003254	0.1	0.2	0	0.1	0.1	0	0.8	0.2	0.2	0.3	0.1	0.1
FBgn0030593	0.8	3.3	0.2	0.1	9.4	0	0	0	2.3	0.1	0.2	3
FBgn0036311	0.1	0.1	0	0	0	0	12	0	0	0.9	0.1	0.1
FBgn0037606	1.7	0.9	1.1	1	0.9	2.2	0.4	0.3	0.6	0.7	2	0.7
FBgn0035610	8.1	2.3	0.6	6	36.2	0.4	0.7	0.5	36.2	0.5	11.3	0.5
FBgn0000028	12.1	1.3	0.6	0.3	0.5	0.1	8.6	1.3	0.3	2.2	3.1	0.5
FBgn0027865	2.5	1.5	0.1	0.8	0.7	2.2	0.1	0.4	3.6	6.4	2	1.1
FBgn0034853	0.4	0.2	0.2	0.3	0.3	2.8	0.4	0.3	0.2	0.3	0.4	0.3
FBgn0013987	1	1.1	2	2.9	1.6	1.3	0.2	1.2	1.3	0.9	1.1	0.9
FBgn0051612	0.8	0.8	0.8	1	0.9	2.4	0.2	1.1	0.9	0.7	1.4	0.7
FBgn0011207	0.9	0.6	0.6	0.6	1.5	2.2	1.4	1.7	0.7	1.1	0.8	0.7
FBgn0033817	0.1	11.9	0	0	0.1	0.7	0.3	0.2	0	0.8	0	0.1
FBgn0038774	0	0.9	0.6	5.1	0.1	0.1	0	0.1	0.1	0	0.1	3.1
FBgn0034127	0	0	0.1	0	0.1	0	12.2	0.1	0.1	1.7	0	0.1
FBgn0032681	2.4	1.8	0.8	0.8	0.3	1	0.2	0.8	0.1	0.4	1.4	0.6
FBgn0014380	0.3	0.7	7.3	1.8	3.4	0.2	0.5	2.4	6	0.5	0.4	0.8
FBgn0034606	3.1	2.1	0.4	1.2	0.6	0.7	0.3	8.5	0.4	0	1.1	1.3
FBgn0051131	0.3	0.7	0.6	0.1	0.2	0.3	1.9	1.6	0.7	0.6	0.3	0.2
FBgn0015396	2.1	0.4	0.3	0.3	0.2	4.4	0.2	0.3	1.3	0.5	0.8	0.3
FBgn0033866	7.5	11.2	1.8	4.9	3.8	1.7	7.1	11	4.1	4.6	6.2	7.8
FBgn0015905	0.5	0.4	0.7	0.5	0.4	1.8	1.3	0.9	0.5	0.4	0.3	0.3
FBgn0030617	0.7	2.8	0.3	4.3	0.3	0.1	0.2	1	0.1	0.1	0.2	2.1
FBgn0000075	0.1	1.1	0.1	1.1	0.1	1.2	0.1	0.1	0.1	0	0	0.1
FBgn0024321	5	1.8	1.4	1.1	1.4	0.5	3.7	0.6	0.7	0.6	3.5	1.6
FBgn0020269	21.9	4.5	0.4	1.7	0.6	0.1	0.1	2	0.4	0.4	14.6	2.9
FBgn0032474	2.3	1	0.5	0.6	0.7	1.1	4.3	0.3	1.5	0.7	3	0.6
FBgn0028670	0.1	0.6	2.2	5.1	5.5	1	0.1	0.2	2.7	0.3	0.2	0.8
FBgn0024248	1.9	1.5	1	1.2	1.6	1.5	0.3	1.7	1.4	1.3	1.5	1.6
FBgn0022709	1.7	1.5	0.4	3	0.1	0.2	2	1.1	0	0.1	1.7	2.4
FBgn0013433	24.4	5.8	0.3	0.2	0.4	0.2	0.5	0.3	0.6	0.2	38.2	0.6
FBgn0033663	0.6	0.9	1.1	0.8	1.6	1.1	0.9	4.8	2	2	0.7	0.7
FBgn0029113	0.5	0.4	0.3	0.5	0.5	2.2	0.4	0.5	0.6	0.6	0.6	0.3
FBgn0032095	0.5	0.4	0.9	1	1.4	0.3	2.8	2.3	0.4	1.1	1.4	0.6
FBgn0029879	0.1	0.2	0.1	0.3	0.4	1.7	0.1	0.1	0.1	0.1	0.1	0.2
FBgn0038821	0.2	0.3	0.7	1	0.4	0.2	5.9	1.5	0.1	2	0.8	0.9
FBgn0035914	20.8	8.5	0	0.1	0.2	0.1	0.1	2.2	0.2	0.1	17.8	0.8
FBgn0036018	0.5	0.5	0.5	0.5	0.6	2.1	0.5	1.4	0.5	0.4	0.7	0.7
FBgn0033404	1.3	1.8	1.4	1.2	0.9	0.6	1.9	3	1.4	3.2	2.7	3.4
FBgn0035539	1.9	2.2	0.3	0.4	0.2	1.1	0.5	0.1	10.5	3.1	1.9	2.4
FBgn0052106	0.1	0	0	0	0.1	0	16.9	0.1	0	1.2	0.1	0.1
FBgn0003656	2.1	1.4	0.6	0.5	0.6	1.8	1.9	0.6	0.4	0.6	2.5	1.7
FBgn0002566	1.7	1.2	1.1	1.5	0.8	1.3	0.5	1.6	1.1	1.3	1.9	1.3
FBgn0020633	0	0.1	0.1	0	0	2	0	0	0.1	0.1	0	0.1
FBgn0260005	15.2	6.5	0.3	2.4	14.3	0.3	0.4	0.5	5.2	0.1	24	0.7
FBgn0020251	3.2	1.4	1.4	0.9	1.3	1.1	0.6	0.6	2.8	0.5	2.2	1.8
FBgn0034284	2.5	2.7	1.4	2.2	1.5	1.4	2.3	4.4	2	3.2	3.5	2.9
FBgn0033649	0.8	1.7	1.6	11.5	0.5	0.6	0.4	3.4	1	1	1.1	0.8
FBgn0034439	0.2	2.8	6	1.1	0.2	0.1	3	0.3	0.2	0.3	0.2	0.4
FBgn0013272	0.2	1.4	2.3	3.2	3.3	0.3	0.3	0.2	3.4	0.4	0.2	1.6
FBgn0038197	0.3	0.9	1.5	1.8	0.7	1.6	0.2	1.7	0.4	2.9	0.4	1.5
FBgn0032079	0.5	0.8	1.4	5.5	12.3	1	0.2	0.6	4	0.1	0.4	2.2
FBgn0040322	0.2	5.1	0.2	4.6	0.1	0.1	0.2	2.7	0.1	3.1	0.3	5.1
FBgn0032050	0.2	0.3	0.4	0.3	0.3	1.6	0.4	0.8	0.3	0.3	0.3	0.4
FBgn0039064	37.9	3.7	0.4	0.6	0.4	0.3	0.4	0.2	0.3	0.5	21.9	0.4
FBgn0003900	0.3	0.6	0.4	4	0.4	0.2	5.5	4.9	0.5	0.8	0.6	0.9
FBgn0032835	0.1	3.9	0	0.4	0.4	0	0.3	1.4	0	0.1	0.1	6.9
FBgn0026147	17.6	1.9	1	1	2.1	1.8	0.7	2.3	1.4	0.6	20.3	1.2
FBgn0027565	0.7	0.8	0.6	0.9	0.6	1.6	0.7	0.9	1.1	0.8	0.6	0.9
FBgn0261046	50.2	2.3	4	0.7	0.9	0.6	2.3	0.9	0.7	1.2	25.3	3.2
FBgn0039811	6.3	14.2	1.5	2.9	2.5	0.8	1.6	2	8.8	3	2.3	6.9
FBgn0050115	1.7	1	5.2	1.9	2.7	0.3	0.7	2.4	2.9	1	1.6	1.5
FBgn0243512	1.1	1.4	3.2	1.9	3.2	1.3	0.1	0.6	1.3	0.6	1.1	0.9
FBgn0027342	0.3	0.3	0.9	0.6	0.7	2.9	0.2	1	1	0.3	0.4	0.3
FBgn0003159	0.3	0.5	1.6	0.8	0.9	2.2	3.2	1.1	2.8	0.3	0.4	0.5
FBgn0260399	0	0	0	0	0	3.3	0.5	0	0	0.1	0	0.1
FBgn0035724	0	0	0	0	0	0	9	0	0	1	0	0
FBgn0001124	1.9	1.9	2.2	3.6	3.5	0.7	1.6	0.6	3	0.5	2.1	1.5
FBgn0029687	1.4	0.7	0.7	0.9	0.8	1.7	0.2	1.3	1.2	1.1	1.2	0.7
FBgn0040508	0.4	0.1	0.1	0.1	0.1	0	16.3	0.1	0.1	1.7	0.1	0.2
FBgn0004513	22.1	9.5	0.2	2.8	13.8	0.2	0	12.9	0.2	0.2	24.2	1.3
FBgn0010415	3.2	1.8	0.8	2.4	0.9	0.8	0.4	0.9	0.8	9.4	3.1	1.9
FBgn0051755	0.1	0.2	0.2	0.4	0.1	3.7	0.3	0.3	0.2	0.3	0.2	0.4
FBgn0037099	0.3	0.4	0.4	0.7	0.6	0.2	0.3	0.7	1.4	0.5	0.4	0.3
FBgn0030331	0.3	0.1	0.1	1.9	45.2	0.4	0.1	0.1	11.3	0.1	0.1	0.2
FBgn0036333	2.1	0.9	0.9	1.2	1.5	2.2	0.7	0.6	1.9	0.7	2.5	0.4
FBgn0026391	1.3	1.1	1.4	1.3	0.7	0.6	0.5	1.2	0.6	1.3	1.2	1.6
FBgn0038084	16.2	3.9	0.6	0.9	0.8	0.3	0.2	1.7	1.1	0.7	12.9	1
FBgn0029175	4.1	1.8	0.5	0.4	0.8	2	0.5	1	1.2	0.9	4.5	0.5
FBgn0043362	4.6	2.1	1.2	1.4	5.2	0.9	1.3	1.7	2.2	2.8	2.8	1.5
FBgn0035558	2.1	1.1	0.7	0.8	0.8	2	0.5	0.1	2.9	2.1	1.7	0.5
FBgn0051121	0.2	1.8	0.2	4.8	0.3	0.8	0.2	9.2	0.2	1	0.1	1.8
FBgn0004573	23.4	4.4	1.9	1.4	1.1	0.5	0.4	4.7	28.5	0.6	24.7	1.5
FBgn0036725	43.5	6.5	3.5	2.7	2.5	0.4	1.1	4.4	0.4	1.8	10.6	1.9
FBgn0035844	0.1	0.5	0.5	0.6	0.4	1.5	1.1	0.7	0.9	0.9	0.5	1.2
FBgn0004875	5.7	1.6	0.6	0.8	0.5	2.4	0.2	2.8	0.7	0.7	4.7	1
FBgn0003295	7.1	2.5	1.2	1.3	0.8	0.7	0.7	1.7	1.1	1.1	8.6	2.2
FBgn0039459	0.3	0.2	0.3	0.3	0.3	1.9	0	0.5	0.3	0.2	0.3	0.3
FBgn0010015	0.1	1	0.4	2.9	1.4	0.1	0.1	0.3	6.4	0.2	0.2	4.1
FBgn0026059	1.5	2	0.6	1.1	0.6	1.1	1	1.3	1.1	1.3	1	1.1
FBgn0027083	1.6	0.8	0.9	0.8	0.5	1.6	1.6	1.1	0.6	0.7	1.8	0.7
FBgn0020617	10.6	1.7	0.8	0.5	0.5	0.4	1.4	0.5	1	1.2	1.2	0.7
FBgn0052732	0.9	0.5	0.6	0.5	0.4	2.1	0.2	0.6	0.3	0.3	0.8	0.9
FBgn0031645	0.3	2.9	1.9	3.6	0.1	0.4	0	0.1	0.1	1.8	0.6	2.6
FBgn0028979	1.5	0.5	0.2	0.2	0.2	0	11.7	0.6	0.2	1.9	3.5	1.1
FBgn0030215	0.1	0.1	0.1	0.1	0.1	0	10.8	0.2	0	1.4	0.1	0.1
FBgn0014141	0.1	0.5	0.6	1.7	1.7	0.8	0.2	2.1	3.5	0.4	0.2	2.5
FBgn0031001	0.8	1.5	2.6	8.2	1.2	2.5	9.7	3.4	1.3	6.1	2.1	2.5
FBgn0029006	1.1	0.8	1.1	0.7	0.5	2.2	0.3	0.6	0.7	1.1	0.9	0.7
FBgn0032470	1.9	4.7	2.6	11.9	21.5	0.5	0.7	1.6	1.4	0.4	1.6	6.1
FBgn0035948	7.4	3.3	0.2	0.8	0.7	0.6	0.4	0.4	0.1	0.3	12.1	1.2
FBgn0041092	2.2	0.9	2	1.7	1.6	1.1	0.9	2.1	2.2	4.1	1	1
FBgn0054007	0.1	0.5	0.5	0.1	0.5	0.1	0.2	0.4	0.4	2.7	0.2	1.3
FBgn0028468	0.2	0.3	1.5	0.5	1.4	1.6	0.1	0.3	0.9	0.2	0.2	0.3
FBgn0035944	0.9	1.1	1.7	0.9	1.6	1.5	0.7	5.4	1.8	1.5	1.1	0.9
FBgn0003165	0.7	0.2	0.1	0.1	0.1	3.4	0.1	0.1	0.1	0.1	0.3	0.1
FBgn0015795	1.1	1.4	1.8	1.7	2.5	0.9	0.5	2	3.4	2.2	1.4	1.4
FBgn0012037	0.3	0.5	9	1.2	0.1	0	0.6	0.8	0.7	2.1	0.5	1
FBgn0013563	0.6	0.7	1.5	0.8	2.4	1.5	0.7	0.5	1.6	1.9	0.7	1.1
FBgn0031684	0.8	0.9	1.1	1.3	1.3	0.5	1.5	0.7	0.8	0.5	1.2	1.8
FBgn0010909	0.9	0.6	1.2	1.1	0.2	2.6	0.3	0.6	1	0.6	0.7	0.6
FBgn0051708	9.9	3.8	0.2	0.2	0.8	0	3.1	0.8	0.9	0.8	6.2	1.1
FBgn0003091	7.3	2.7	0.3	3.9	0.2	0.5	0.1	20.2	0.3	0.1	4.2	0.6
FBgn0015772	3.4	1.2	0.8	1.8	1.9	2.6	0.7	1.7	4.4	1.1	4.4	1.3
FBgn0026432	2.2	0.8	0.4	0.4	0.4	2.5	0.6	0.6	0.6	0.5	1.5	0.3
FBgn0010453	3.6	1.1	1.3	2.2	0.8	0.3	1.8	1.3	0.9	1.8	2.9	0.5
FBgn0010516	0.5	1.7	1.6	1.7	3.5	0.7	0.1	0.8	2.1	1.4	0.5	2.1
FBgn0032821	13.7	4.3	0.3	1.8	1.2	1	1.8	3.7	1.2	0.4	11.4	2.7
FBgn0033639	1.7	0.9	1	1	1.1	1.5	0.9	0.5	4.8	1.3	1.8	0.9
FBgn0034158	2.1	1.2	0.7	1.5	1	2.3	0.2	0.5	0.5	2.4	1.8	0.6
FBgn0031424	11	2.5	0.1	0.4	0.2	0.3	0.2	1	0.2	0.3	7.6	0.8
FBgn0086778	78.3	6.2	0.8	1.7	1.9	0.3	0.3	0.5	1.9	1.1	66.6	1.4
FBgn0029663	36.9	7.2	0.2	0.4	0.6	0.1	0.1	0.4	0.4	0.2	37.4	0.8
FBgn0031692	0.1	6.2	1.6	0.8	0	0	0.2	2	0	0	0	2
FBgn0030600	11.6	2.4	4.6	1.2	1.5	0.3	1.8	0.3	1.1	0.6	10.9	0.5
FBgn0032858	2.2	0.7	1.1	0.8	1.2	2.4	0.6	0.6	1.3	0.4	2.2	0.5
FBgn0032256	2	0.7	0.7	0.6	1.7	2.5	0.2	1.3	0.5	0.4	1.9	0.7
FBgn0086447	0.5	0.7	0.6	0.6	0.8	1.8	0.3	1.7	0.3	0.4	0.6	0.6
FBgn0034083	2.2	1.1	4.1	2.2	2.2	1.2	0.6	1.4	2.2	2.4	2.2	0.9
FBgn0001138	3	1.9	0.2	0.3	0.8	0.1	0.1	0.9	0.6	0.4	6.6	1.1
FBgn0035484	0.4	2.8	0.7	1.2	8	0.1	0.2	0.7	2.5	9.3	0.4	5.2
FBgn0003963	0.9	0.8	0.1	0.4	0.4	2	0.4	2.4	0.4	1.7	1.2	0.7
FBgn0031082	0.1	0.1	0.2	0	0.1	0.1	10.6	0	0.1	1	0	0.1
FBgn0000279	1.2	9.6	0.3	0.8	0.5	0.3	0.2	1.1	2.4	4.7	0.5	4
FBgn0036009	0.2	2.6	1.1	0.3	0.5	0.7	1.5	2	0.5	0.9	0.2	0.5
FBgn0019990	0.9	0.8	0.8	1	1.6	2.3	0.5	0.7	1.1	0.7	1.1	0.6
FBgn0001250	0.6	1.6	0.7	4.5	2.3	0.2	0.3	0.7	9.1	0.2	0.9	2.2
FBgn0030052	1.5	1.1	1.6	1.8	1.2	0.7	0.7	0.5	1	0.2	2.3	2.8
FBgn0259112	1.3	1	0.4	0.6	1.4	1.1	1.1	0.4	0.4	0.7	0.9	0.5
FBgn0000546	2.3	1.2	0.8	1.4	1	2	0.3	1.1	6.6	7.6	1.4	1.3
FBgn0028424	1	1.8	7	1.9	19.5	0.1	0.1	4.5	9	0.3	1.1	1.5
FBgn0032089	0.3	0.5	0.7	0.3	0.6	0.5	6.2	0.6	0.5	2.1	0.5	0.7
FBgn0035691	0.7	0.5	0.6	0.8	0.3	2.2	2.4	1.1	0.5	0.9	0.9	0.5
FBgn0030701	2.9	1.1	0.3	0.6	0.5	1.6	0.3	0.7	1.2	1.9	2.5	0.5
FBgn0001122	11	2.9	1.3	0.9	0.4	1.6	0.4	0.9	0.7	0.3	11.1	0.8
FBgn0038542	4.9	2.1	7.9	1.7	1.2	0.8	0.6	1.2	10.8	0.9	4.4	0.4
FBgn0037720	0.6	1.6	1.2	1.9	3.8	1.2	1.7	0.7	0.8	0.3	1	1.4
FBgn0052364	0.8	0.5	0.2	0.3	0.3	1.8	3.3	0.2	0.3	0.6	0.5	0.3
FBgn0035673	0.1	0.1	0.1	0.3	41.9	0.1	0.2	0.2	0.3	0.1	0.2	0.1
FBgn0031319	3.7	1	0.8	0.8	1.3	1.5	2.3	11.3	1	1.4	3.2	1
FBgn0051146	0.1	0.8	0.2	1.1	0.4	0.1	0.2	1.8	0.1	0.2	0.3	2.6
FBgn0029723	4.1	4.5	1.3	2.3	3.3	1.9	0.9	6.4	4.4	4.7	2.7	3.8
FBgn0051072	2.5	1.2	6.2	2.8	6.7	0.8	0.3	2.6	5.3	0.2	2.7	0.3
FBgn0036168	0.3	0.1	1.4	2.3	1	0.7	3.8	0.8	0.4	0.8	0.6	1.4
FBgn0035890	0.4	0.4	0.7	0.6	0.6	0.9	6.1	0.8	0.7	1.2	0.5	0.5
FBgn0085280	2.9	2.5	2.9	1.5	1	0.9	0.8	3	1.9	5.4	1.1	2.3
FBgn0030505	2	1.1	0.5	0.9	1.4	1.5	0.5	1.3	2.1	2.5	1.1	1.6
FBgn0034647	0.2	0.9	12.5	4.8	0.5	0.1	0.1	0.3	0.5	0.8	0.2	0.5
FBgn0033359	1.6	0.6	1.5	5.5	1.2	1.3	10.5	4.3	0.9	2.8	1.9	2.3
FBgn0036195	1	2.3	1.1	1.2	0.6	0.5	0.8	1.9	0.6	1.2	1.2	2.2
FBgn0040510	0	0.1	0.1	0.1	0.1	0	20.1	0.1	0.1	3.4	0	0.1
FBgn0050015	2.5	1.8	2.4	2.3	0.2	0.1	2.1	0.7	0.4	0.4	1.7	1.4
FBgn0015609	8.7	3.1	0.2	0.2	0.1	0.2	5.2	3.3	0.1	0.8	6.8	0.4
FBgn0034740	0.1	0.2	0.2	0.1	0.2	0.1	14.2	0.4	0.2	2.8	0.1	0.2
FBgn0001994	4.1	1.4	1	1.5	0.5	1.6	0.5	3.4	1	1.2	3.2	1.2
FBgn0039083	0.1	0	0	0.2	0	0	17.2	0.1	0	2.2	0	0
FBgn0039915	32.5	13.8	0.1	0.3	0.2	0.1	0.2	3.4	0.2	17.2	59.4	0.8
FBgn0051159	1.1	0.6	0.9	0.9	0.7	1.4	4.8	0.5	0.5	0.7	0.7	1
FBgn0052791	7.7	2.5	1.7	1.8	1.9	1.6	0.8	2.7	0.9	1.5	7.7	2.8
FBgn0033592	0.1	0.4	0.1	104.8	1.2	0.1	0.4	1.5	0.2	0.6	0.3	0.5
FBgn0011661	0.9	1.5	2	2.2	2.2	1.1	0.3	2.5	2.4	0.8	1.2	0.9
FBgn0032868	0	0	0	0	0	0	0.1	23.8	0	0	0	0.1
FBgn0011584	1.8	2	1.8	3	2.5	0.7	0.2	1.6	2.2	1.4	2.6	1.9
FBgn0036487	1.2	0.8	0.7	1.1	1	1.4	1	0.6	0.9	0.7	1.2	0.5
FBgn0035865	0.1	0.3	0.7	0.3	0.2	0.3	0.2	0.7	0.3	0.8	0.1	0.8
FBgn0038676	0.9	0.5	0.8	1.1	0.3	0.2	0.2	0.4	0.5	0.7	0.7	2.1
FBgn0052251	0	0.1	0.2	0.1	0.1	3.2	0.1	0.1	0.1	0.1	0	0.2
FBgn0031952	1.5	0.6	0.5	0.7	0.2	1	10.5	1.2	0.2	1	1.3	0.6
FBgn0013467	21.4	10.7	0	0	0.1	0	0	0	0	0	12.6	0.3
FBgn0035612	0.4	0.4	0.2	3.8	0.3	0.3	0.2	0.2	0.5	0.5	0.7	0.7
FBgn0024510	0.7	0.4	0.4	0.3	0.3	2.2	0.8	0.3	0.2	0.5	0.6	0.3
FBgn0087012	5.3	9	0.5	0.8	0.1	0.1	1.9	5.9	0.2	0.6	1.8	0.8
FBgn0036309	1	0.6	2.2	1.1	0.8	1.7	1	0.6	1.3	0.7	1.3	0.4
FBgn0034136	25.4	6.4	0.1	0.3	0.3	0.1	0.2	0.5	0.1	0.3	10.9	2.2
FBgn0035978	0.5	1.6	0.7	1.5	6.4	0.1	0.2	0.3	0.9	1.1	0.8	3
FBgn0011274	1.1	0.7	1.6	0.7	1.1	1.1	1	0.9	2.1	1.2	1.1	1.2
FBgn0036665	0.4	3.3	0.6	12.2	0.5	0.3	0.7	0.6	0.1	0.3	0.5	3.2
FBgn0086711	0.2	0.4	0	0.7	0	2.7	0.1	0	0	0.1	0.2	0.5
FBgn0036272	1.3	0.5	0.3	0.3	0.7	2.6	0.6	3.9	0.8	0.1	1.6	0.8
FBgn0050018	1.4	1.4	1.4	1.7	1.6	0.6	1	2.7	1.3	1.4	1.5	2.1
FBgn0032457	0.1	0.1	0.1	0.1	0.1	0	12.1	0.1	0.1	1	0.1	0.2
FBgn0010747	0.8	1	1.2	1.2	1.9	1.2	1.3	2.9	1.2	1.3	0.8	1.1
FBgn0003339	3	4	0.2	0.5	0.3	0.1	0.3	0.5	0.3	0.3	0.5	2
FBgn0034731	21.2	3.3	1	0.7	0.4	0.3	0.7	0.3	0.3	0.3	8.2	0.2
FBgn0033504	0.7	1.9	1.3	3.3	1.7	0.3	0.4	2.2	0.6	1.7	1	2.2
FBgn0029664	1.3	1	0.7	0.8	1.5	1.1	0.3	1.3	1.2	0.7	1.7	2
FBgn0032921	0.6	0.5	0.5	0.5	0.6	1.7	0.9	0.9	0.7	0.8	1	0.8
FBgn0031150	1.1	0.7	0.7	1.3	1.8	3	0.5	1.7	1	0.8	1.1	0.8
FBgn0032465	1.5	1.1	1.4	1.3	1.6	1.3	1.5	4.6	2.8	1.7	1.5	1.2
FBgn0035162	0.4	0.4	0.5	0.4	0.6	1.6	0.2	0.7	0.3	0.3	0.3	0.4
FBgn0011204	0.5	0.4	0.7	1	0.4	1.6	0.2	1.9	0.3	0.2	0.6	1.3
FBgn0050489	0.1	2.2	8.8	0.8	15.4	1.1	0.1	2.2	7.9	5.5	0.1	3.6
FBgn0262593	9.5	1	2.4	1.2	1.2	0.7	0.6	0.5	1.4	1	7.6	2.5
FBgn0037956	2.5	2.7	0.3	3.7	0.3	0.3	0.7	2.1	0.2	0.2	1.7	2.7
FBgn0036777	1.6	0.6	0.2	0.2	4.2	1.8	0.2	0.2	3	0.3	2.2	0.3
FBgn0040031	0.2	0.2	0.1	0.3	0.2	0.2	10.1	0.4	0.3	1.8	0.3	0.1
FBgn0031037	0.8	1.4	0.7	4.7	0.8	0.7	0.2	0.5	1.7	4.2	1.2	2.4
FBgn0085491	0.2	0.2	0.1	60.7	0.2	0.2	0.4	0.3	0.1	0.3	0.3	0.4
FBgn0028644	35.9	4.8	0.4	0.5	0.5	0	0.2	5.2	0.6	1.2	20.8	0.5
FBgn0004889	1.8	1.8	0.9	8.3	1.7	1.2	0.2	0.8	3.5	1.1	1.5	0.9
FBgn0041171	1.1	0.7	0.8	0.8	1.3	2.2	1.5	0.6	1.3	1.7	1	0.6
FBgn0052027	0	0.1	0.1	0.1	0.1	4.1	0.1	0.1	0.1	0.1	0.1	0.1
FBgn0003944	0.4	0.4	0.6	0.7	0.4	0.1	0.2	0.7	0.4	0.5	14.9	2.7
FBgn0035710	0.6	1.4	0.2	1.1	0	0.3	0	0.6	0.1	1	1.3	2.2
FBgn0036569	1.2	0.7	1.2	0.7	1	2.6	0.2	0.8	0.7	0.6	1.9	0.7
FBgn0038627	1.1	1	1.1	1.5	1.7	0.7	2.4	2.3	2	2.6	1.4	2
FBgn0027589	18.8	4.7	1.1	0.5	0.3	0.1	2.1	0.4	0.5	0.6	9.3	0.7
FBgn0004619	89.5	15.1	0.5	1.4	0.5	0.7	2.8	0.4	0.6	1.9	68.9	2
FBgn0019809	1.9	0.8	1	0.3	0.5	0.8	2.5	0.3	0.3	0.5	0.9	0.8
FBgn0052944	19.1	2.6	0.3	0.3	0.3	0.1	3.6	0.6	0.3	0.8	18.4	1.3
FBgn0034194	1.1	1.2	4.1	7.3	2.8	0.4	0.5	1.3	1.7	0.9	0.8	2
FBgn0039705	0.7	0.5	0.5	1.2	0.6	1.4	3.4	0.6	1	0.8	0.6	0.5
FBgn0033731	0.3	0.7	0.7	0.5	0.6	0.5	0.3	0.3	0.4	0.9	0.3	1.2
FBgn0035157	4	1.8	1.2	0.5	0.4	0.4	0.2	0.4	0.6	0.5	6.1	0.7
FBgn0024740	0.4	4.2	0.4	0.5	0.5	0.4	9.6	0.7	0.4	6	0.4	2.4
FBgn0028341	0.8	0.4	0.6	0.6	1.5	1.9	0.9	0.6	2.1	1.2	0.6	0.6
FBgn0031441	0.2	0.4	0.3	0.4	0.5	0.1	12.7	0.4	0.2	3.4	0.2	0.9
FBgn0042185	27.2	5.8	0.9	1.5	1.9	0.2	0.2	0.8	1.3	3.4	24	0.8
FBgn0015946	8	2.5	0.7	1	1.2	0.8	0.2	0.5	0.7	1.1	5.7	3.8
FBgn0011737	3	0.9	0.2	0.3	0.2	2.5	3.6	0.5	0.3	1	2.7	0.2
FBgn0004648	0.8	0.9	1.4	1.2	0.4	1.5	0.3	2.3	1.1	2.6	0.5	1.5
FBgn0034627	1.1	0.6	1.1	0.8	1.4	2.2	1.3	1.3	2.3	1.8	1.5	0.7
FBgn0004855	0.6	0.8	0.9	1	0.4	1.7	0.4	1.7	0.9	0.8	0.6	0.7
FBgn0013733	1.8	1.4	1.3	2.2	0.6	0.5	0.2	1	1.3	0.9	1.8	2.4
FBgn0000008	1.9	0.9	0.5	0.3	0.5	2.8	0.5	1.9	1.3	1.7	0.6	0.9
FBgn0004839	3.4	0.7	1.1	4.3	1.6	0.3	0.6	0.5	0.5	1	1.7	1.3
FBgn0031877	0.2	0.9	1.1	1	4.3	0.9	0.1	0.4	0.7	0.8	0.3	1.2
FBgn0051814	13.6	2.8	0.2	0.4	0.4	0.1	0.1	0.5	0.4	0.4	8.1	0.9
FBgn0051665	36.5	8.5	0	0.2	0.2	0	0.1	0.3	0.2	0	44.7	0.3
FBgn0031855	12.6	2.6	1.2	3.2	0.6	0.2	0.4	0.7	0.9	0.5	4.1	1.2
FBgn0039487	0.7	0.8	0.4	0.2	0.1	2.5	1.3	1	0.2	5.1	0.8	0.3
FBgn0037448	0.7	2.7	3.2	7.1	0.7	0.4	1.2	3.4	0.6	0.2	0.4	1.3
FBgn0032209	0.5	0.4	7	3.6	2	0.1	1.1	0.1	5.3	1.7	1.1	12.2
FBgn0031738	2.2	0.7	2.8	1.7	7.9	1.5	0.4	1.6	6.8	0.4	1.7	0.4
FBgn0051191	50.3	8.7	0.2	0.4	0.6	0.2	0.2	0.7	0.2	0.4	18.7	0.2
FBgn0032448	0.1	0.1	0.1	0.1	0.1	0	11.6	0.1	0.1	0.9	0	0.1
FBgn0036659	0.1	2.2	1.6	0.3	0.1	0.1	0.2	0.2	0.5	0.2	0.1	5.3
FBgn0010470	0.3	1.1	1.9	0.8	0.8	0.6	0.1	6.7	2.4	6.2	0.3	1.8
FBgn0035755	0.1	2.4	0.4	16.7	0.9	0.1	0.3	3.2	0.1	0.1	0.1	3.3
FBgn0086675	22.1	4.6	0.1	0.1	0.1	0	0.1	0.1	0.1	0.2	24.5	0.5
FBgn0035426	0.2	0.1	0.1	0	0.1	0	15.9	0.1	0.1	2.2	0.2	0.1
FBgn0032521	0.4	0.7	0.2	0.4	0.1	3.1	0.4	0.2	0	0.2	0.4	0.5
FBgn0036107	1.4	1.2	1.1	0.9	0.5	2	0.5	2	1.8	0.8	1.7	1.2
FBgn0031602	2.2	1.6	3.1	2	1	0.3	0.9	2.3	1	1.9	2.2	1.9
FBgn0001089	1	0.7	12.4	0.3	0.1	0	0.6	0.1	0.1	0.3	1.2	0.5
FBgn0030438	0	0	0	0	0	2.3	0	0.1	0	0.1	0	0.1
FBgn0039519	0	0	0.1	1.3	48.7	0	0.1	0.1	21.3	0.1	0	0.1
FBgn0003731	0.3	2.2	0.6	1.5	0.4	0.3	0.1	0.6	0.8	1.8	0.3	3.1
FBgn0033324	0.2	0.2	1.6	0.4	0.5	0.1	6.3	0.7	0.3	1.1	0.5	0.7
FBgn0032151	62	3.2	0.3	0.6	0.8	0.2	0.4	0.7	0.6	0.8	33	0.8
FBgn0051445	0.4	3.4	0.2	6.5	0.3	0.1	4.4	4.4	0.1	0.9	0.2	3
FBgn0020236	0.7	1.9	1.9	2.1	1.2	1.6	0.4	1.4	2.2	2.8	2.3	1.7
FBgn0037534	0	2.4	0.6	8.2	0.4	0.3	0	0	0.2	0	0	2.8
FBgn0035429	0.5	0.8	1.5	0.5	0.6	0.4	0.6	1	0.7	0.8	0.5	0.7
FBgn0026206	7.1	0.8	0.3	0.6	0.3	3.2	0.7	0.5	0.4	0.5	4.9	0.5
FBgn0028999	0.6	0.3	0.5	0.4	0.5	0.2	0.2	0.5	0.4	0.9	0.6	0.5
FBgn0000180	7.6	2.1	1	0.3	0.3	0.7	1	0.6	0.5	0.8	10.8	1
FBgn0036327	0.1	0	0.1	0.1	0.1	0.1	14.6	0.3	0.1	3	0.1	0.1
FBgn0024956	1.1	0.6	0.6	0.7	0.4	1.7	0.5	0.9	0.3	0.9	1.3	0.6
FBgn0020299	6.3	4	1.2	1.9	0.7	0.2	0.8	1.5	0.1	0.7	11.3	2.4
FBgn0053196	0.2	1.4	0.7	6.5	0.4	0.3	0.4	0.7	0.5	0.7	0.4	2.5
FBgn0052017	20.2	6.9	0.2	0.3	0.6	0	0	1.2	0.4	0.2	19.8	0.3
FBgn0038629	1.5	1.4	3.3	0.8	1.8	1	1.2	2.7	1.2	1	2.1	2.5
FBgn0050440	0	0.6	0	0.7	0.1	2.5	0.5	0.1	0.1	0.1	0.1	0.4
FBgn0036030	1	1.4	0.3	0.8	1.5	1.1	0.2	1	0.6	5.2	0.9	1.2
FBgn0023215	2.4	1	0.8	1.2	0.6	1.8	0.4	0.8	1.7	1.2	1.8	1
FBgn0010247	2.9	2.5	1.2	1.2	1.2	0.7	0.6	2.2	0.5	1.8	4.3	1.3
FBgn0027783	0.3	0.2	0.1	0.1	0.3	3	0.6	0.2	0.3	0.3	0.3	0.2
FBgn0015239	0.8	0.8	0.9	1.4	1.6	1.8	0.5	2.3	1.7	2.4	0.9	1.2
FBgn0035488	2.3	1	0.5	0.6	0.5	2.4	0.4	0.6	0.6	0.6	2.6	0.5
FBgn0039078	2.5	1.6	5.3	4.4	2.8	3	2.3	3.2	4.5	3.9	4.4	2.5
FBgn0032251	0.6	0.4	0.4	0.4	0.4	2.2	1	0.4	0.4	0.4	0.7	0.4
FBgn0000119	1.9	1.5	1.4	1.3	1.4	3.5	0.5	1.1	2.4	1.8	1.3	0.7
FBgn0038828	2.6	0.9	0.6	0.3	0.4	3.5	0.1	0.2	0.4	2.6	3.6	0.4
FBgn0031835	18.2	5.9	0.3	5.4	0.4	0.1	1.1	3.3	0.3	0.1	19.6	0.5
FBgn0036778	0	0	0	1.7	0	0	3	0	0	0.2	0	0.1
FBgn0026086	2.2	0.9	0.5	0.9	0.6	0.6	1	1	1.2	0.4	1.6	2.3
FBgn0036264	0.3	4.1	0.4	0.7	0.5	0.3	0.3	0.4	0.8	1.6	0.2	6.6
FBgn0004387	2.5	1.5	0.7	1.7	3	1.6	0.1	1	3.4	1.8	1.7	1
FBgn0030685	1.7	1	2	1.4	1	2	0.8	0.7	1	0.9	1.4	0.8
FBgn0038532	1.9	0.7	0.6	0.6	0.8	2.5	1.3	0.7	0.7	0.7	2.4	0.6
FBgn0033027	0	0	0	0	0	0	0	0	0	0	0	2.7
FBgn0001248	0.4	1.2	2	1.9	1.5	0.7	0.5	0.9	0.6	0.7	0.6	2.3
FBgn0030246	0.8	0.6	1	1	0.9	1.5	1.4	1	0.7	0.5	0.8	0.9
FBgn0053110	0.1	3.5	0	0.2	0	0	0.5	0.8	0	0.1	0.1	5
FBgn0000158	0	0	0.1	0.1	0	3.5	0.5	0.1	0	0.3	0.1	0
FBgn0039788	0.1	0.1	0.2	0.1	0.3	0.1	11.1	0.2	2.5	1.5	0.1	0.1
FBgn0003117	0.5	1.4	1.4	0.2	0.1	0.1	0.3	0.2	2.9	2.3	0.3	1.8
FBgn0034662	0	0	13	5.2	0.2	0	0	0	0	0	0	0
FBgn0031566	1.4	0.9	1.6	0.9	2.2	1.6	0.6	0.8	6.4	1.9	1.1	1
FBgn0028425	0.5	0.7	0.3	0.2	0.3	1.8	0.3	1.2	0.2	0.1	0.6	0.2
FBgn0035328	0	0	0	0	0	1.8	0	0	0	0	0	0.1
FBgn0085400	2.8	1.4	0.7	1.4	0.4	0.3	1.3	0.3	0.4	1.3	2.5	0.8
FBgn0037093	1.7	1	0.8	0.8	0.9	3.1	0.1	1.5	1.5	1.5	1.3	0.7
FBgn0052232	1.2	0.2	0.3	0.3	0.2	0	11.8	0.2	0.3	2.1	0.8	0.3
FBgn0032774	0.2	6	0.6	2.7	0.2	0	0.8	1	0.1	0.9	0.1	4.1
FBgn0027074	0.3	11.7	0.9	0.4	0.3	0.4	5.6	2	2.3	2.7	0.3	7.9
FBgn0053258	0	0	0.1	6.8	18.2	0	0	0	0	0	0	0
FBgn0003984	1	2.6	0.9	2.2	4.5	1	0.6	1.1	5.2	0.3	1.3	1.9
FBgn0040512	0.5	1.8	0.8	3.1	1.4	0.8	0.6	1.8	1.3	2.1	0.6	2.3
FBgn0003187	0	0	0	0.3	0	2.4	3.1	0	0	0.3	0	0
FBgn0052506	7.1	2.5	1.2	0.4	1	0.9	1.5	1.2	0.8	0.4	4.6	1.2
FBgn0041180	0.1	3.7	1.3	5.9	0.2	0.3	0.1	0.1	1.9	3.1	0.1	3.8
FBgn0010340	1.2	0.9	0.9	1.6	1.6	1.6	0.8	1.2	1.8	0.7	1.5	1
FBgn0243516	0.8	1	1.3	1.5	0.6	2.5	0.5	0.9	2.3	1.6	1.1	1.3
FBgn0036684	1.7	1	0.7	4	1.4	2.3	0.3	6.1	1.6	2.2	1.6	1
FBgn0004647	1.6	1.1	0.3	0.3	0.1	2.9	0.1	0	0.1	0.2	2.1	0.6
FBgn0050419	8.9	1.6	1.9	0.9	1.4	1	1.1	1.8	1.1	2.2	2.4	2
FBgn0031220	0.3	2.8	0.1	0.1	0.1	0.1	0.1	0.2	2.6	20.7	0.2	4.7
FBgn0051875	0.1	0.1	1	0.3	0.6	2.7	2	0	0.8	0.5	0.1	0.2
FBgn0011259	12.3	1.6	0.4	0.5	0.2	2.5	0.4	1.2	0.4	0.2	8.8	0.4
FBgn0039310	0	0	9.7	18.6	18.9	0	0	0	1.1	0	0	0.1
FBgn0063670	1.3	1.1	0.6	0.7	0.3	1.8	0.2	1.1	0.8	1.2	1.3	0.4
FBgn0032147	0.3	0.7	1.2	0.8	5.5	1	0.3	2	3	2.2	0.4	1.1
FBgn0086408	2	0.9	1.7	0.5	0.3	1.3	0.8	1	0.2	0.3	1	0.6
FBgn0050392	1.1	0.8	2.4	1	1.1	1.3	1.1	2.5	2.5	0.5	1.1	0.3
FBgn0026593	0.2	2.4	1.7	0.7	2.1	0.9	0	0.1	0	0.3	0.2	4.2
FBgn0031693	0.2	3.4	4.1	0.3	0.1	0	0.7	7	0.1	4.5	0.1	3.2
FBgn0036083	2.2	1.9	3.2	4	4.7	2.4	1.3	3.3	1.9	5.2	2.3	2.5
FBgn0011230	1.3	1	0.9	1.7	1.5	1.2	1.8	1.7	2.7	1.1	1.3	1.5
FBgn0011648	0.6	0.5	1.1	0.5	0.5	2.1	0.3	0.7	0.8	1	0.6	0.6
FBgn0032471	0	0	0	0	0.1	0	13.6	0	0	0.7	0.1	0.1
FBgn0030343	0.5	0.7	1.1	1	1.9	1	4.1	0.8	1.5	1.2	0.5	0.9
FBgn0020503	2.3	1.4	1.2	2	1.5	1.2	4.7	1.1	1.2	0.8	2.3	1.4
FBgn0033397	0	0.6	0.1	0.5	18.6	0.1	1.6	81.6	7.3	0.4	0	0.7
FBgn0037987	0	0	0.1	0	0.1	0	12.1	0.1	0.1	1.1	0	0.1
FBgn0004197	0.5	0.8	1	8.4	0.6	0.3	3	0.9	0.7	2.2	0.6	1
FBgn0035575	101.5	37	0.6	0.4	1.5	0.1	1.8	1.3	0.3	0.7	37.5	0.3
FBgn0046706	1.2	0.6	0.3	0.5	0.2	2.5	0.6	0.7	0.4	0.5	1	0.3
FBgn0031228	1.2	1.5	1.6	1.8	1.5	0.8	0.8	1.1	1.5	1	1.6	2.1
FBgn0050151	0.1	2.5	0.1	3.3	0.2	0	0.1	0.8	0	3	0.1	3.1
FBgn0029941	1.2	0.5	0.5	0.5	0.4	2.4	0.4	0.4	0.8	0.6	1	0.5
FBgn0036529	0.5	1.7	1.6	1.3	2	0.1	0.3	44.9	5.3	18.5	0.3	1.1
FBgn0038143	14.4	10.8	0.4	0.4	0.1	0	0.1	0.2	0.2	0	13.9	0.6
FBgn0005619	1.9	13.6	0	0	0	0	0	0.1	0	0.1	3.1	0.1
FBgn0036440	0.7	0.2	0.6	0.4	0.5	0.5	7.7	34.5	1	0.6	0.7	0.6
FBgn0030746	0.3	0.3	12.3	2.1	5.9	0.1	0.3	0.6	1.4	0.1	0.2	0.3
FBgn0023172	0.9	1.1	1.6	2.4	1.3	2	0.2	0.9	1.7	1.2	0.7	1.3
FBgn0038606	4.6	1.1	0.8	1.6	1.4	0.4	0.5	2.7	1.4	0.9	4.3	3.3
FBgn0025833	29.3	5.2	0.2	0.3	0.2	0	0.1	1.3	0.2	0.3	26.5	0.8
FBgn0033640	1	0.9	1.4	2.6	1.6	0.9	0.6	3.7	1.4	0.5	1.2	2.4
FBgn0036460	0.6	0.6	0.8	0.7	0.9	2	1	2.1	0.3	0.5	0.7	0.8
FBgn0032015	0.7	1	1.8	1.2	2.2	1.1	0.8	7.4	2.2	2.3	0.7	0.9
FBgn0033139	0	0.2	13	4.3	3	0	0.1	0	6.1	0.3	0	0.6
FBgn0004244	29.3	2.6	0.3	0.4	0.3	0.1	0.3	0.3	0.6	0.3	25	0.8
FBgn0040271	4.6	3.4	2.5	3.2	0.2	1.4	1	0.7	0.5	0.1	3.2	0.6
FBgn0036928	1.1	0.8	0.7	0.8	0.4	1.4	1.2	0.6	0.6	0.4	1.2	0.7
FBgn0032054	0.7	0.6	0.9	0.9	0.9	1.6	1.7	0.9	1.3	0.9	0.8	1
FBgn0029088	3.1	0.9	1	1.2	0.8	2.4	0.4	1.5	1.7	0.6	3.3	0.9
FBgn0024277	45.8	8.2	0.8	0.5	0.5	0.1	0.1	0.1	0.4	0	27.5	0.7
FBgn0036016	0	0.3	0	0	0	0	12.9	0	0	1	0	0
FBgn0031930	0.1	0.1	13.8	0.1	0.1	0.1	0.1	0.3	0.1	0.1	0.1	0.1
FBgn0029975	1	0.7	1	3.3	0.2	0.5	0.2	0.3	0.1	0.3	1.1	3.8
FBgn0034046	0.4	0.3	0.1	0.2	0.2	2.4	1.6	0.3	0.2	0.3	0.4	0.5
FBgn0052369	2.4	0.9	1.7	2	1.9	0.2	0.9	1.7	2.6	4.1	1.6	1.5
FBgn0028523	7.6	4.3	0.1	0.4	0.7	0.7	0.4	0.2	0.4	0.7	12.6	1.1
FBgn0050325	0.4	0.4	0.4	0.3	0.4	0.2	9.8	0.9	0.6	1.9	0.2	1.1
FBgn0032585	0.5	1	1.3	1.1	1.3	0.3	0.9	2.1	0.3	4.3	0.4	3.2
FBgn0017590	29.3	6.1	0.4	0.3	0.3	0.1	0.1	0.6	0.3	0.3	20.9	0.8
FBgn0033323	0	0.1	0.1	0.1	0.1	0.1	10.9	0.1	0.1	2.5	0.1	0.2
FBgn0035227	3.8	1.5	1.3	1.8	1.8	1.4	0.4	2.6	1.4	1.2	4	2
FBgn0036991	0.9	0.3	0.4	0.5	0.8	2.7	1.1	0.4	0.4	0.5	0.6	0.4
FBgn0031681	2.6	1.5	1.5	1.1	1.1	0.9	0.3	4.9	3.7	1.5	2	0.9
FBgn0261258	3.3	1.6	0.9	2.9	3	0.5	0.4	2	1.6	0.3	3.3	1.2
FBgn0031292	0.2	0.4	0.3	0.1	0.3	0.1	16.2	0.4	0.4	2.4	0.3	0.3
FBgn0003137	1.1	3.1	0.7	0.4	0.1	0.2	0.3	0.1	0.1	0.1	0.6	3.7
FBgn0058470	15.3	5.4	0.3	0.1	0.1	0.4	7.7	0.4	0.3	1.5	8.3	0.6
FBgn0002905	0.4	0.2	0.3	0.4	0.2	2.2	1.2	0.9	0.2	0.3	0.6	0.4
FBgn0035936	2.6	1.1	0.3	0.2	0	2.3	0	0.2	0	0	1.4	0.3
FBgn0031016	2.4	1.2	1.4	1.8	0.8	1.3	0.4	1.1	0.9	0.8	1.1	0.5
FBgn0038179	0.2	7.3	0.3	0.8	13.3	0	0.1	0.4	11.7	0	0.2	6.9
FBgn0033405	1.1	0.6	1.4	0.4	1.2	0.6	2.7	1.6	0.7	1	0.7	2
FBgn0033729	0.7	9.6	0.5	0.4	0.7	0.2	0.3	1	0.4	0.4	0.3	1.2
FBgn0041160	0.2	1.7	1	3.3	2.3	0.4	0.1	5.3	29.7	5.3	0.2	1.7
FBgn0003891	1.8	1.4	0.6	2.1	2.9	1	0.7	1.2	3.4	2.3	2.2	1.4
FBgn0050343	1.9	2.4	2	1	0.9	2	0.3	1	1.7	1.5	2.8	1
FBgn0020907	7.4	8.7	0	0	19	0	0	0	20.4	0.1	15.8	0.3
FBgn0051100	2.9	4.6	0.2	18.5	0.4	0.2	3.2	9.6	15.2	76.1	7.7	2.3
FBgn0013973	22.6	4.2	0.8	0.2	0.3	0.4	0.8	0.4	0.5	1.2	10	0.5
FBgn0026239	1.2	0.8	1.2	1.1	2.1	2.1	1.5	1	2	1.8	1.2	1
FBgn0000454	0.8	0.5	1.3	0.6	3.4	1.2	0.7	0.4	3	1.5	0.9	0.4
FBgn0051235	6	2.5	0.6	0.6	0.5	0.4	0.8	1	0.8	0.5	11.9	1.9
FBgn0004635	10.5	5.3	0.7	0.7	0.4	0.2	0.2	0.5	0.4	0.2	14.2	1.3
FBgn0033687	0.4	0.2	0.1	0.1	0	0	13.8	0.1	0.1	1.1	0.8	0.1
FBgn0038098	1.5	0.5	13	0.3	0.1	0.4	0.1	0.3	0	0.1	1.3	0.3
FBgn0052056	2.3	1.4	1.9	1.8	6.7	2	0.2	2.3	7.8	7.1	2.7	0.8
FBgn0051660	25.2	3.2	0.7	0.4	0.6	0.3	0.4	1.2	0.5	0.5	15	1.1
FBgn0032913	0	0	0	0.1	20.4	0	0	0	16.9	0	0	0
FBgn0004595	30.3	4.6	1.4	0.5	0.4	0	1	0.3	0.8	0.3	26.8	1.4
FBgn0260799	2.5	1.8	0.5	0.9	0.4	1.8	0.4	0.4	0.9	1.6	2.8	0.5
FBgn0025697	5.3	8.3	3	0.3	0.1	0.1	0.6	0.2	0.4	23	6.8	2.9
FBgn0036710	0.2	0.2	0.3	0.3	0.2	2	1.8	0.2	0.3	0.5	0.2	0.3
FBgn0033259	1.3	1.3	1.7	1.7	3	1.7	0.5	1	4.6	1.1	1	1.1
FBgn0038485	0.7	1.9	3.4	2.7	1.4	0.9	2.4	2.1	1.4	4	0.4	4.3
FBgn0013765	1.7	0.6	0.3	0.5	0.1	2	0.1	0.2	0	0.5	1.8	0.8
FBgn0027505	0.2	0.1	0.2	0.1	0.1	0.1	6.1	0.3	0.2	0.9	0.2	0.2
FBgn0015766	1.5	2.2	0.3	2.8	0.1	0.2	0.8	5.2	0	0.6	1.6	1.7
FBgn0053203	22	7.2	0.3	0.7	0.1	0.1	0.1	0.4	0.1	0.2	20.4	1.1
FBgn0034281	1.6	0.3	1	0.9	1.7	1.5	1.1	1.1	1.4	3.6	0.8	0.4
FBgn0000377	1.2	1	0.7	1	1.6	1.7	0.3	1.4	1.2	0.8	1.3	0.8
FBgn0051108	1.2	0.4	0.5	0.4	0.3	1.7	2.8	0.4	0.6	0.7	1.6	0.3
FBgn0034897	0.5	1.1	0.7	1.5	4.1	1.8	0.1	0.2	3.7	1.5	0.5	2
FBgn0038332	2.5	0.8	0.2	0.4	0.3	0.1	14.5	0.2	0.1	1.1	1.8	0.5
FBgn0003748	3	1.9	1.2	1.9	0.4	0.8	1.2	1.5	0.2	0.6	3.8	1.3
FBgn0036335	0.8	0.7	0.6	0.9	0.4	1.4	0.2	0.7	0.2	0.3	0.9	0.7
FBgn0033661	0.3	0.4	0.5	0.4	0.5	3.1	0.2	1.4	0.3	0.2	0.3	0.6
FBgn0004593	0.6	1.7	3	0.8	3.2	0.6	0.9	1.1	1.2	19.2	0.7	1.3
FBgn0053129	0.7	0.8	0.5	1.2	0.5	1.7	0.7	0.4	1.3	5.7	0.6	1.1
FBgn0030304	15.9	12	0.7	1.9	0.8	0.2	0.3	2.1	0.1	0.1	31.5	2.4
FBgn0004367	0.5	0.6	0.4	0.4	0.2	2.8	0.3	0.7	0.7	0.6	0.6	0.7
FBgn0031874	1.3	1	1.5	0.9	1.1	1.9	0.3	1.2	1.2	0.8	1.2	1.2
FBgn0033814	0.9	1.6	1.7	2	0.9	1	2	7.3	1.1	1.7	1.1	1.6
FBgn0033766	0.5	0.3	0.3	0.3	0.3	2.2	0.2	1	0.3	0.4	0.6	0.3
FBgn0031627	21.7	11.3	0.3	0.5	0.2	0.2	0.5	0.1	0.3	0.2	10	0.8
FBgn0004893	0.2	1	2.1	4.6	6.5	0.4	0.4	4.3	6.5	0.6	0.3	0.9
FBgn0033710	2.2	7.4	0.1	0.2	0.1	0	0.3	0.8	0.3	1.3	4.2	2.1
FBgn0032387	0.3	1.4	13.9	0.1	0.1	0	0.1	0.2	0.1	0.1	0.1	0.9
FBgn0000535	3	2.2	1.7	2.9	2.7	1.1	0.9	2.6	1.1	1.1	3.3	2
FBgn0030512	1.6	1.3	1	1.6	1.8	1.9	0	0.3	1.8	0.6	1	1.2
FBgn0037514	0	0	0	0	0.1	0	9.9	0.1	0.1	1.6	0.1	0.1
FBgn0032586	1.3	0.8	1.1	0.7	1.8	1.3	2.1	0.6	1.1	1.1	1	1.4
FBgn0037100	1.2	0.7	1.2	1.4	42	0.4	0.5	0.7	14.4	0.5	1.2	1.6
FBgn0014006	1.2	1	1	2	1.1	1.6	0.4	1.4	0.9	0.6	1.3	1.4
FBgn0032689	1.1	0.9	1.5	1.4	2	1.4	0.6	2.3	1.6	0.7	1.4	0.8
FBgn0000489	1.2	1.2	0.3	4.2	2	0.3	2.3	0.8	3.5	0.2	0.2	1.5
FBgn0054039	1	0.8	0.7	0.7	0.4	1.7	1.7	0.8	1.2	1	1	0.6
FBgn0017561	0.7	0.5	0.6	0.9	0.2	2.7	0	0.2	0.1	0.1	0.7	0.8
FBgn0032857	1.1	1.3	0.4	0.3	0	0	12.4	0.1	0.4	0.8	1	1.4
FBgn0051524	0.1	0.1	0.2	0.1	0.1	0.1	0.2	117.3	0.2	0.1	0.1	0.3
FBgn0030847	3	2.8	2.7	4.8	1.8	0.5	1	0.9	2	0.3	2.6	1.5
FBgn0037413	0.3	2.4	1.3	0.7	0.8	0.3	8.1	0.3	0.3	1.2	0.2	1.2
FBgn0031842	1.1	0.9	1.7	1.2	0.9	1.2	1	3	1.2	1.2	1.1	1.2
FBgn0032535	0.6	1.2	1.5	0.7	1	0.3	1.3	1.2	1.4	0.9	1.3	1.2
FBgn0051368	1.4	0.6	0.6	0.8	0.6	1.8	0.4	1.5	0.8	0.6	1.2	0.7
FBgn0038498	36.8	6.9	0.2	0.3	0.4	0.1	0.2	0.3	0.3	0.2	35.3	0.6
FBgn0052499	0.3	1.5	0.3	0.2	0.7	0.2	1.6	2.2	0.7	0.5	0.3	2.8
FBgn0038092	23.7	4.8	0.7	0.7	0.5	0.3	1.8	0.6	0.4	0.8	21.7	0.4
FBgn0086613	1	0.7	1.1	1.2	1	1.9	1	1.4	1	1	1.1	1.1
FBgn0010105	3.5	2.3	0.8	4.6	1.1	0.1	0.3	0.9	3.8	0.4	2.7	1.4
FBgn0005561	2.1	3.1	1.9	1.1	1	0.6	0.7	1.6	0.5	2.1	5.6	3
FBgn0051729	1.4	1.8	1.3	1.9	2.3	1.4	1	3.7	1.6	0.7	1.2	1
FBgn0040493	0.2	0.4	0.8	0.4	1.5	1.2	2	0.6	4.6	2.4	0.3	0.6
FBgn0031238	0.9	0.8	0.5	0.7	0.8	2.2	0.3	1.4	0.6	0.5	0.8	0.6
FBgn0028490	3.9	3.5	0.2	0.6	0.7	0.4	0.4	0.2	1.2	6.4	4.2	3.7
FBgn0032084	0.1	1.3	0.5	1.7	4.8	1.4	0.8	0.9	1.6	0.2	0.1	1.7
FBgn0033582	0.1	0.1	11.5	2.9	0.3	0	0.1	0.1	1.4	0.1	0.1	0.1
FBgn0051459	0	0	0	0.1	0.1	0	9.5	0	0	1	0	0.1
FBgn0034529	1.6	0.9	0.9	1.1	1.1	2.2	0.8	0.7	1.5	1	1.1	0.6
FBgn0022710	1.9	2.5	3.1	4.9	6.4	0.4	0.2	0.8	13.6	0.3	1.5	1.4
FBgn0003716	1.3	1	1.8	1.7	3.2	1.6	0.2	1	2.4	0.7	1.2	1
FBgn0035959	0.3	0.1	0.1	0.1	0.1	2.7	0.1	0.1	0.2	0.3	0.2	0.2
FBgn0038613	0.1	0.1	21.9	0.3	0.3	0.1	0.2	0.2	0.2	0.2	0.1	0.3
FBgn0004359	0.8	1.4	0.2	1.2	3.9	1.4	0.4	0.5	0.5	0.5	0.9	1.4
FBgn0033742	0.1	5.2	0.7	1	0.4	0.1	0.8	0.6	0.6	23.5	0.5	6.1
FBgn0003502	0.6	0.7	0.3	0.6	0.7	2.6	0.2	1.2	0.7	0.7	0.5	0.4
FBgn0016059	1.6	1.4	0.6	2.6	0.5	1.1	0.6	1.2	0.3	1.7	0.8	0.8
FBgn0034177	1.4	0.8	0.8	0.7	0.6	1.5	0.3	0.9	0.7	0.7	1.4	0.7
FBgn0039209	2	1.1	1.1	1.3	1.5	1.8	0.2	1.4	2	1	1.3	1.4
FBgn0030729	0.7	0.8	1.5	1.1	1.1	0.7	0.8	1.4	1.1	1.2	1.4	2.6
FBgn0039850	0.2	0.2	0.6	0.3	3.1	0.1	9.7	0.3	1.9	1.3	0.2	0.2
FBgn0039938	4.2	2.7	0.1	0.7	0.1	0.2	0.2	0.2	0	0.2	0.3	4.4
FBgn0038755	2.2	1.2	0.5	0.8	1.2	2.6	0.2	0.8	4.4	1.2	2.4	1.5
FBgn0034739	0.1	0	0	0	0.1	0	13.6	0.1	0.1	3.2	0.1	0.1
FBgn0034282	1.5	0.7	0.3	0.4	0.4	2	0.8	0.5	0.7	0.9	1.2	0.4
FBgn0033578	1	8.3	0.7	1.3	1.3	0.7	0.8	1.1	0.6	0.9	0.7	3
FBgn0004575	18.5	6.3	0.1	0	0.1	0	0	0.4	0.1	0	21.2	0.3
FBgn0034441	0.7	0.7	1.9	1	1.2	0.6	0.4	1.2	1.6	1.9	1.5	2.8
FBgn0031741	0.1	0.2	10.5	2.2	1.3	0.4	0.5	4.3	0.2	4.8	0.1	0.2
FBgn0010620	0	1.7	0.5	3.7	1.3	1.6	0.3	8.7	0.6	0	0	0.9
FBgn0037992	0.2	0.1	0.3	0.4	0.1	0	0.7	0	0.1	0.6	0.1	0.2
FBgn0038269	0.7	0.5	0.4	0.5	0.3	2.3	2.2	1.4	0.4	0.6	0.6	0.6
FBgn0028744	0.3	0.4	0.6	0.4	0.7	2.1	0.2	1.2	0.2	0.2	0.2	0.4
FBgn0033953	0	0	0	0	0	0	3.8	0	0	0.6	0	0.1
FBgn0031832	0.4	0.4	0.6	0.7	0.8	2.4	0.2	1.9	0.9	0.9	0.6	0.8
FBgn0013303	5.3	2.7	0.5	1	0.7	1.5	0.7	0.9	1.4	1.2	6.3	0.8
FBgn0039114	0.1	2.5	1.5	2.9	0.2	0.1	0	0.1	1.3	18.6	0.1	4.1
FBgn0037822	1.7	1.1	0.8	0.9	1.1	1.4	0.4	1	0.4	0.3	2.3	0.9
FBgn0031413	0.5	0.5	0.6	0.9	1.1	2	0.7	0.4	0.7	0.5	0.6	0.7
FBgn0053056	0.7	1.5	0.7	3.2	0.5	0.6	0.1	0.3	0.5	0.6	1.1	4.3
FBgn0010114	25.8	8.6	0.1	0.1	0	0	0.1	0.1	0.1	0	32.5	0.3
FBgn0040395	3.2	1.7	0.4	0.8	0.5	1.1	0.1	0.8	0.4	2.1	3.5	1.1
FBgn0015316	1	0.4	10.8	5.5	0.2	0.1	0.6	0.1	0.1	0.2	0.9	0.1
FBgn0003090	1.3	1.5	1.6	3.2	0.5	0.4	0.7	1.8	0.4	0.5	1.3	2.5
FBgn0260400	29	2.6	0.7	2.7	1.2	0.2	0.2	0.9	0.8	0.3	14	1
FBgn0035382	9.9	2	1.2	0.9	1.8	0.8	0.3	0.5	2.7	1.8	5.9	1.4
FBgn0010651	0.5	1.3	1.9	2.3	18.2	0.1	0.3	0.7	6.7	3	0.6	2.7
FBgn0035076	0.7	4.9	0.1	0.3	0.2	0	0.2	0	0.1	0.5	0.7	5.2
FBgn0032456	0.8	0.8	3.6	1	3.7	2	0.4	0.4	2.2	0.9	0.6	1
FBgn0035896	1.9	4.2	0.5	2	1.5	1.9	0.3	0.5	1.4	0.1	1.3	0.4
FBgn0058160	0.2	1.3	2	2.3	1	1.4	0.2	2.2	2.2	2.8	0.2	1.3
FBgn0035379	0.1	3.1	0.4	0.2	0.2	0.2	1.5	0.1	0.7	0.3	0.6	2.7
FBgn0000216	0.1	0.3	0.4	0.4	0.2	0.1	0	0.5	0.2	0.3	0.3	0.3
FBgn0052296	1.6	0.5	0.9	1.4	0.6	1.4	1	1.5	0.9	0.7	1.2	0.9
FBgn0032475	1.9	0.7	0.5	0.7	0.7	2.9	0.2	0.9	0.6	0.8	1.2	0.6
FBgn0028899	0.5	0.1	0.2	0.3	0.2	0.1	12.6	0.4	0.3	0.9	0.9	0.3
FBgn0037085	1.2	2.6	3.7	2.9	5.4	0.7	5.7	5	2.6	3	1.6	7.3
FBgn0015032	0.3	2.8	0.4	7.3	0.3	0.1	1.3	0.1	0.5	0.6	0.6	0.9
FBgn0031896	1.6	0.9	0.5	0.7	0.4	1.8	1.7	0.6	0.7	1.1	1.8	0.6
FBgn0051627	0.8	0.2	0.3	0.2	0.2	0.1	10.5	0.3	0.2	1.1	1	0.3
FBgn0032974	1.3	0.6	0.6	0.6	0.8	2.2	0.6	0.8	0.7	0.7	1.4	0.5
FBgn0038460	1.2	2	4	3.6	2.1	0.6	0.3	6	0.9	3.3	1.7	1.5
FBgn0050404	1.4	0.8	0.9	1	1.1	1.7	1.1	0.9	1.8	1.4	1.1	0.8
FBgn0032602	0.9	0.6	2.1	2.7	1.1	0.3	0.7	1.4	0.9	1.5	0.9	1.3
FBgn0028962	1.4	0.8	1	1.3	1	1.6	0.2	1	0.6	0.5	2	1
FBgn0032433	0.9	0.4	10.8	1.8	0.2	0	0.1	0.1	0.1	0.3	1	0.2
FBgn0002973	0.6	0.9	1	1.7	6	2.5	0.3	0.4	4.7	0.1	0.5	0.3
FBgn0061515	0.9	0.8	0.3	2.3	2.1	1.4	1.9	0.4	1.2	1	0.9	0.5
FBgn0032318	0	0	0	0	0	0.1	2.2	91.4	0	0.8	0.1	0
FBgn0051902	0.1	0.1	0	0	0.1	0.1	0.2	111	0.1	0.1	0.1	0.3
FBgn0031996	0.8	0.8	0.8	0.8	0.8	1.8	0.6	6.5	0.9	2	1.1	0.7
FBgn0086372	25.6	8.4	0.1	0.3	0.1	0.1	0	0.2	0.2	0.2	26.3	0.6
FBgn0033698	1	0.8	0.8	0.9	0.9	1.8	0.8	1.5	1.8	0.9	1	1.7
FBgn0010313	1.7	1.5	0.4	1.7	0.8	1.9	0.1	0.3	0.9	0.7	1.1	0.7
FBgn0033572	0.1	0.1	0.2	0.2	0.2	0.1	14.3	0.5	0.2	1.8	0.1	0.1
FBgn0035483	0.5	0.5	0.8	0.7	0.7	0.9	5.1	0.5	0.7	0.9	0.5	0.7
FBgn0041605	6.4	5.1	0	0	0	0	0	0	0	0	5.9	0.2
FBgn0004362	0.5	0.2	0.2	0.2	0.3	1.9	0.2	0.2	0.2	0.4	0.2	0.1
FBgn0003483	0	0	0	0	0	2.2	0.3	0.1	0	0.3	0	0.1
FBgn0033448	0.3	0.9	4.7	3.6	4.1	0.2	0.2	2.7	2.6	0.2	0.6	0.8
FBgn0002543	3.1	0.9	1.7	1.3	1	0.1	0.8	0.6	1.2	4.1	3.2	1.7
FBgn0033785	0.2	0.6	2	0.6	0.4	0.4	5	0.2	0.5	0.4	0.5	0.5
FBgn0032728	1.1	0.8	0.7	0.7	0.8	1.9	0.3	1.3	1	0.7	1.1	0.6
FBgn0036398	4.3	1.2	1	2.1	1.3	2.7	0.2	2.2	1.2	0.9	2.5	1.3
FBgn0031992	1	1.3	1	1.4	0.9	1.4	0.5	1.5	2.3	4.4	0.8	1.1
FBgn0015774	20.3	4.8	1.2	1.6	0.4	0.3	0.3	0.6	1.7	2.2	19	1.1
FBgn0033631	2.7	1.4	0.2	1.4	0.6	2	0.3	0.6	0.3	1	3.6	0.4
FBgn0041604	0.8	1.4	1	3.5	0.7	2.9	0.4	0.3	2.7	0.2	0.8	0.3
FBgn0032880	1.7	1.1	1.7	1.5	0.8	1	1.1	4.7	1.6	1.6	1.7	1.1
FBgn0010435	0.1	2.3	0.4	3.9	0.3	0.2	2.5	0.2	0.4	0.5	0.1	2.7
FBgn0030838	1.8	1.1	1	1.1	1.4	1.5	1.3	0.7	1.1	1.2	1.5	1.1
FBgn0002592	0.4	1.1	1.6	0.8	0.3	0.4	0.4	0.3	0.7	0.9	0.5	2.2
FBgn0010894	0.8	1.3	0.6	4	0.5	1.3	0.7	3.2	0.4	0.7	0.8	1
FBgn0000179	11.6	3.2	0.5	1.1	1	0.1	0.9	1.2	2.1	1.8	4	2.3
FBgn0051719	0.8	2.1	3.1	5.4	0.1	0	0.2	0	0.1	0	0.3	2
FBgn0042102	0.1	0.2	17.5	2.2	9.6	0	0.1	0.2	9.4	0.1	0.1	0.1
FBgn0035021	1	0.6	0.7	0.7	0.6	1.8	1.2	1	0.7	0.6	0.7	0.7
FBgn0037676	32.6	9	0.1	0.1	0.2	0.1	0.1	0.7	0.3	0.2	52.4	0.4
FBgn0003129	0.3	1.2	2.1	2.5	0.8	0.6	3.2	7.1	0.5	8.7	0.5	2.5
FBgn0039630	0.1	3.2	0.5	1.1	0.4	0.4	0.3	0.7	0.3	0.2	0.4	5.6
FBgn0036821	0.8	3.8	0.6	0.2	0.7	0.1	0	0	1.8	8.5	1.9	3.2
FBgn0002645	1	0.7	1	1.3	0.3	2.2	0.5	0.5	1.7	0.8	1.1	1
FBgn0025633	0.8	0.6	0.7	0.6	2.3	2.7	0.1	0.5	1.4	0.8	0.6	0.4
FBgn0052407	1.7	2.3	6.7	2.2	4.1	0.1	0.9	0.2	0.5	2.5	2.1	1
FBgn0036486	0.3	0.1	0.1	0.1	0.1	2.7	0.8	0.1	0.1	0.2	0.3	0.1
FBgn0054010	1.5	1.2	2.7	2	8.4	0.8	0.2	1.8	6.4	1.1	1.6	0.3
FBgn0051321	0.7	8.5	0.2	0.5	0.1	0	0.4	0.1	0.1	0.5	2.9	8.7
FBgn0004374	0.1	0.1	0.1	0.4	0.8	2.1	2.9	0.1	0.4	0.7	0.2	0.4
FBgn0033579	8.3	3.2	3.8	3.2	0.6	0.8	4.1	5.5	1.2	3.2	5.9	2.7
FBgn0034366	0.8	0.8	0.6	0.8	4.9	1.6	0.6	1.3	2.1	7	0.9	0.8
FBgn0003209	0.9	1.3	1.7	1.7	0.6	1.2	0.2	0.3	0.3	1.8	0.9	1.5
FBgn0003429	3	3	1.9	0.5	0.2	0.1	0.4	0.2	0.1	0.2	1.6	3.7
FBgn0031390	1.6	0.8	0.8	0.9	1.1	1.6	0.5	1	0.7	0.6	1.3	0.7
FBgn0042135	1	1.3	1.4	2.3	4.9	1.3	0.3	0.8	5	0.5	0.8	0.9
FBgn0026427	1.7	0.6	0.4	0.6	0.4	2.8	1.6	1	0.7	0.6	1	0.5
FBgn0025388	0.4	0.2	0.1	0.1	0.1	3.6	5	0.3	0.1	0.8	0.4	0.1
FBgn0039380	25.4	2.4	1.1	1.2	0.6	1	1.8	0.6	0.5	1.4	15	0.3
FBgn0033821	0.2	4.5	1.4	0.3	0.1	0	0	0	0	7.5	0.1	3.3
FBgn0036881	0.7	1.1	2.4	1.4	0.9	0.8	0.9	1.2	0.9	0.7	0.9	5
FBgn0000256	1.8	0.6	2.4	2	0.3	0.7	8.1	0.6	0.5	0.9	1.8	0.6
FBgn0052243	1	0.6	0.5	0.6	0.7	2.1	0.7	0.6	2.1	1.9	0.7	0.3
FBgn0028506	0.2	0.3	0.2	0.6	0.2	2.4	0.2	1.2	0.4	0.4	0.2	0.4
FBgn0032513	0.7	0.8	0.5	0.6	0.5	1.5	2.8	0.6	0.2	0.5	0.8	0.9
FBgn0002466	0	0.1	0.1	0	0.1	4.2	0.9	0	0.1	0.4	0.1	0.2
FBgn0020385	0.1	2.9	0.6	0.5	0.8	0.4	0.2	0.1	0.2	13.5	0.2	4.3
FBgn0030408	12	2.6	0.8	1	1.2	0.4	0.3	1.1	0.8	0.6	0.8	3.4
FBgn0039040	0.1	9.2	0	0.1	0	0	0	0.5	0	0	0.1	5.2
FBgn0011224	5.6	0.5	0.1	0.4	0.1	2.8	0.3	0.8	0.2	0.2	2.1	0.2
FBgn0029114	0.5	1.1	0.3	2.5	0.2	2.7	1.2	1.1	0.3	0.5	1.1	0.7
FBgn0035949	0.6	0.6	0.9	0.6	0.8	0.8	0.9	1.1	0.8	2.7	1	0.9
FBgn0042098	0.7	0.5	1	0.7	1.4	0.4	1	0.8	0.6	3.6	0.6	0.8
FBgn0020647	1.1	0.6	0.3	0.3	2.1	0.9	2.2	1.6	0.8	1.4	1	2.9
FBgn0034618	0.5	1.3	0.3	0.7	0.3	0.9	0.1	0.3	0.5	2	0.7	3.4
FBgn0029082	17.3	3.9	0.1	0.6	0.6	0.1	0.2	0.8	0.4	0.5	13.6	0.5
FBgn0023535	0.2	0.5	0.1	0.6	0.2	0.1	0.1	0.1	0.1	3	0.2	6.5
FBgn0030181	0.4	0.4	0.5	0.4	1.7	0.4	21.5	2.8	1.3	1.7	0.6	1.3
FBgn0027558	1	0.6	1.4	0.6	0.7	2.2	0.8	1	1.2	0.8	0.7	0.6
FBgn0034440	0.4	2.2	2.9	1.4	1	0.3	0.7	5.4	1	3.6	0.3	0.7
FBgn0039770	54.2	11	0.5	0.6	0.4	0.1	0.2	0.3	1	0.2	37.1	1.1
FBgn0029002	0.7	0.3	3.9	0.7	0.8	0.9	0.9	0.1	1.9	10.9	0.5	0.3
FBgn0028956	0.4	0.7	2.2	2.7	6.2	0.9	1	2.1	34.7	12.5	0.5	1.7
FBgn0034368	0.7	0.9	1.1	1.6	1.1	0.9	2.4	0.8	2.4	2.6	0.7	2.5
FBgn0035453	0.2	16	0.2	0.3	0.2	0.1	0.3	0.4	0.3	0.5	0.3	0.7
FBgn0038469	0	0	0	0	0	2.1	0	0	0	0	0	0.1
FBgn0004167	0.2	1.1	7.1	3.5	2.1	0.6	0.1	1.2	3.8	0.4	0.2	1.6
FBgn0016920	1.4	1.6	3.1	2.6	3.5	0.5	0.4	2.6	1.8	2.3	0.8	2.3
FBgn0042630	18.6	3.3	0.7	6.4	0.4	0.1	3.2	0.7	0.3	1.1	3.4	1
FBgn0033544	1.3	2.5	3.4	1.3	1.9	0.8	0.2	0.3	4.8	1.6	1.5	0.7
FBgn0260960	2	1.2	1.7	6.4	1.1	0.6	0.6	0.1	0.4	0.3	2.2	0.6
FBgn0035435	0.3	0.3	0.2	0.3	0.4	2	0.7	0.1	0.7	0.7	0.3	0.4
FBgn0051176	0.5	2.1	0.3	13.2	0.3	0.4	0.4	0.5	0.4	0.3	0.4	0.7
FBgn0028550	1	1.7	3.8	5.4	1.3	0.1	0.1	1.3	1.1	0.3	2	1.5
FBgn0026058	0.6	0.6	0.8	0.8	0.8	0.4	3.9	1.5	0.3	2.8	2.8	0.8
FBgn0039161	1	2.3	0.8	7.8	0.5	0.1	0.4	1.1	0.5	0.1	0.9	2.1
FBgn0035260	5.9	2.6	1.7	1.6	2.4	1.9	1.5	2.3	1.7	2.8	5	2.4
FBgn0013811	0.4	1.1	0.9	1.3	1.3	0.4	8.4	1.5	2.2	3.1	0.6	0.4
FBgn0039297	0.2	1.4	3.6	8.7	3.4	0.2	0.9	2.5	1.2	0.4	0.2	3.8
FBgn0034974	0.2	3	0.9	0.4	0.3	0.3	1.4	0.5	0.2	0.3	0.2	1.8
FBgn0014002	1.2	1.9	1.7	1.3	1.8	0.9	0.6	10.5	2.1	2.3	1.3	2.8
FBgn0038163	0	0	0.1	0	0.1	0	11.3	1.4	0.1	1.3	0	0.1
FBgn0030647	0.8	1.5	1.9	1.1	0.8	0.6	7.8	1.4	0.8	2.7	1.2	1.9
FBgn0013810	0.3	0.4	0.3	0.3	0.2	0.6	9.5	0.2	0.2	1.2	0.4	0.6
FBgn0039109	0.8	0.7	0.5	1	3.1	0.4	3.8	0.9	5.3	1.2	0.8	1.7
FBgn0031032	0.4	0.8	3.4	0.4	1.2	1.3	0.6	0.8	0.9	0.8	1.1	1.4
FBgn0004580	15.9	6.9	0.4	0.1	0	0	0	0	0	0	19.8	0.5
FBgn0042110	0.1	0.6	9.7	2.1	0.7	0.1	0.2	0.8	0.6	0.7	0.3	0.5
FBgn0028622	0.1	2	0.3	4.9	0.2	0.4	0.1	0.3	0.1	0.2	0.2	2.8
FBgn0038917	2.7	2.4	0.9	2	1	1.6	0.9	4.3	0.7	1.5	2.5	3.8
FBgn0032647	0.2	0.4	0.1	0.2	0.1	0.1	14.1	0.2	0.1	2.2	0.1	0.4
FBgn0003378	1	1.2	2.1	2.1	1.6	0.9	0.9	0.7	1.3	783.5	1.4	2.2
FBgn0011666	0.5	0.9	0.3	0.3	0.1	1.5	0.3	0.3	0.2	0.2	0.4	1.1
FBgn0004168	36.4	7	0.1	0.5	0.9	0.1	0.2	1.3	0.3	0.4	23.6	0.8
FBgn0022984	1.9	1.3	0.9	1.1	0.5	1.2	1.4	1.8	1.8	1.5	1.5	0.9
FBgn0029814	124.5	14.5	0.8	1.8	0.8	0.3	0.3	0.5	0.5	1	45.1	0.8
FBgn0001084	1	0.7	0.4	0.6	0.6	3	0.6	0.8	0.4	0.5	0.7	0.6
FBgn0243511	0.9	0.5	0.5	0.6	0.5	2.1	2.9	0.8	0.6	0.8	0.7	0.5
FBgn0038083	0.3	1.4	10.8	3.8	1.7	0	0.1	0.1	141	4.1	0.1	0.9
FBgn0033783	1.9	1.1	1.2	0.9	1.9	2.6	0.3	0.8	1.9	1.5	2.3	0.8
FBgn0034264	0.3	2.2	0.5	4.3	0.7	0.2	0.8	0.3	0.3	1	0.3	2.2
FBgn0033760	0	0.6	9.6	0.7	0.4	0	0	0.2	0.9	0	0.1	0.3
FBgn0086706	0.9	1.2	0.7	1.3	1.5	1	0.5	3.6	1.3	2.1	1.3	1.2
FBgn0005683	0.3	0.2	0.1	0.2	0.2	3.1	1	0.4	0.2	0.4	0.4	0.2
FBgn0034301	0.7	0.8	1	0.9	0.8	1	0.9	1.6	0.9	2.4	0.8	2
FBgn0034229	0.1	3.1	0	0.4	0.1	0	0.1	19.8	0	0	0.1	3.6
FBgn0033705	0.2	0.1	0.1	0.1	0.1	0	13.6	0.1	0	1.9	0.1	0
FBgn0000719	2.9	1.5	0.7	0.9	1.3	3	0.1	0.4	0.9	4.9	3.2	0.9
FBgn0051634	0.7	0.7	1	1.2	1.2	0.9	0.6	2	0.5	2	1.9	1.5
FBgn0045479	1	0.6	3.1	2.1	1	0.7	4	0.8	1.3	2.7	0.7	1.3
FBgn0003175	0.5	0.9	2	2.4	1.2	1.6	0.3	1.3	3	2	0.6	1.2
FBgn0032082	0.2	0.2	1.2	0.1	0.1	1.9	0.2	3.3	0.1	0.4	0.2	0.1
FBgn0034371	2	1.4	0.4	2.2	0.4	0.8	0.6	0.3	0.5	1.2	2.1	1.9
FBgn0030077	1	1.3	2.3	2.8	0.4	0.8	0.7	1.2	0.5	1.1	0.5	1.2
FBgn0033929	0.6	0.5	0.5	0.7	0.8	1.6	1.4	1.3	1	0.7	0.6	0.5
FBgn0003319	1	1.4	0.9	2	1.4	0.4	0.5	1.2	0.6	2	1.1	2
FBgn0039755	0	0	0	0	0	0	0	0	0	0	0	6.1
FBgn0035244	1.7	1.1	2	1.3	4.2	1.5	1	1	1.3	0.5	1.9	1.3
FBgn0031130	0	0	0	0.1	0	0	13.9	0.1	0.1	1.5	0.1	0.1
FBgn0011288	10.9	5.8	0	0	0	0	0	0.4	0	0	13.8	0.4
FBgn0039431	4.4	1	0.2	0.8	0.2	2	0.2	1.8	0.3	0.2	3.9	0.4
FBgn0051103	0.2	7.9	0.2	1.2	0.7	0.1	0.2	0.2	0.3	0.2	0.2	6.3
FBgn0032988	0.8	0.6	0.6	0.5	0.5	1.7	0.8	1.1	0.4	0.5	0.9	0.4
FBgn0038916	1	1.3	5.3	1.4	19.5	0.2	0.5	0.2	2.8	0.4	0.9	0.7
FBgn0045495	3.3	2.6	0.7	1.5	1.1	0.5	0.7	2.1	1.4	1.6	12.1	2.5
FBgn0031893	2.1	1	0.6	1.2	1.2	1.6	0.4	1.1	1.2	0.5	2	1
FBgn0085351	3.8	2.2	2.8	3	1	1.9	0.3	3	1.5	1.4	2.1	4.6
FBgn0034197	0.6	0.3	8.2	0.1	0.1	0.1	0.1	0.1	0.1	0.1	3.9	0.1
FBgn0031703	0.6	2.3	0.9	1.6	13.8	0.8	0.4	1.3	1.3	0.1	0.9	2.3
FBgn0039840	0.2	0.4	13.8	0.2	12.5	0.2	0.2	0.2	8.2	0.4	0.2	0.1
FBgn0058006	0.1	3.5	0	0.1	0.1	1.8	0	0.1	0	0.2	0.1	2.7
FBgn0044871	1	0.8	1.2	1.1	0.6	2	0.8	1.5	0.9	1.9	1	0.7
FBgn0034200	0.1	4.2	0	0.4	0.1	0	0.2	0	0	12.9	0.1	5.6
FBgn0029084	0.1	0.1	0.1	0.1	0.2	0	7.9	0.2	0.1	0.7	0.1	0.3
FBgn0034223	0.6	0.4	0.5	0.3	0.5	3	0.3	0.6	1.3	0.6	0.6	0.3
FBgn0002932	0.7	0.6	2	0.7	1.2	2.9	0.2	0.3	1	0.2	0.7	0.3
FBgn0040505	34.1	7.6	0.2	0.3	0.3	0	0.2	0.6	0.2	0	30.1	0.8
FBgn0036621	0.8	0.7	1.3	1.1	0.6	1.7	0.2	0.8	2.6	1.8	0.5	1
FBgn0028370	11.6	2.3	1	1	1	0.7	1	1	0.9	1.2	5.9	1.6
FBgn0033921	0.1	0	0	0	0	2.4	0.2	0.4	0	0.1	0.1	0
FBgn0031695	2.9	1.4	3.6	7.9	0.4	0.1	0.5	1	0.5	0.6	2.6	2.4
FBgn0000575	3.1	2	1.7	1.7	0.7	0.9	0.1	0.5	1.9	1.1	2.4	1
FBgn0039056	1.3	0.9	0.8	1	0.8	2.5	0.6	2	0.6	0.9	1.5	0.6
FBgn0010241	0	0.2	13.8	5.4	0.4	0	0.1	0.1	0.1	0.1	0	0.2
FBgn0051201	0.6	0.9	1.1	6.1	1.1	0.4	1.2	2.5	0.7	0.8	0.6	2.4
FBgn0034032	3.2	1.5	0.7	1	1.3	2.2	0.8	0.9	3.2	2.4	3.7	0.6
FBgn0030796	17.7	6.6	1.6	3.4	0.7	0.2	1.2	1	0.8	0.7	23.9	1.2
FBgn0036191	0.5	0.4	1.8	0.6	6.5	1.4	0.7	0.3	1	0.3	0.5	0.8
FBgn0029672	0.2	0.3	0.4	0.3	0.4	2.2	0.1	1	0.2	0.3	0.2	0.3
FBgn0037989	4.1	1.7	2.1	1.9	1.3	0.2	2.1	1	1.7	1	4.1	1.5
FBgn0028692	0.5	0.6	0.6	0.8	1	1.6	1.1	0.8	3.4	1.6	0.6	1.4
FBgn0039747	3.3	1.6	3.1	3.8	1.2	0.3	1	0.8	0.7	1	3.8	1.5
FBgn0034728	0.7	0.6	0.7	0.9	1	2.2	0.3	1.4	0.6	0.4	0.8	0.5
FBgn0039026	5.6	1.8	1.1	2.3	1.3	0.7	0.5	1.3	3	1	3.1	1.3
FBgn0062449	1.3	0.6	0.4	0.6	0.3	2	3.4	0.4	0.4	0.8	1.1	0.5
FBgn0030174	2.8	0.6	0.1	0.1	0.2	3	0	0.4	0.1	0.1	4.7	0.4
FBgn0032187	0	0	8.4	1.1	2	0.2	0.2	4.7	1	0	0	0.2
FBgn0038099	0	0	0	0	0.1	2	0.1	2.1	0.1	0	0	0.1
FBgn0014906	2	1.7	2	3.2	1.1	1.5	0.5	1.1	0.8	1.3	2.7	0.4
FBgn0034091	0.9	0.8	0.7	0.5	0.7	1.3	0.4	0.5	0.5	0.5	0.8	0.7
FBgn0036125	0	0.1	0	0.1	0.1	0	12.1	0.1	0.1	1.7	0	0.1
FBgn0023096	0.6	1.5	1.4	0.9	0.8	0.4	1.6	1.2	1.2	2.5	1.2	1.8
FBgn0015577	2.8	2.4	1.3	1.3	0.6	0.2	0.2	0.2	3	0.3	2.1	2.3
FBgn0053272	1.1	0.5	1.3	1.2	0.4	0.4	1	1.3	0.9	2	0.9	1.5
FBgn0001123	4.7	2.3	1.9	2.9	2.4	0.3	0.3	4.1	2.7	1.9	4.3	1.4
FBgn0037084	3.8	1.5	2.4	1	1.3	1.5	0.7	1.1	1.4	0.7	3.8	0.5
FBgn0052100	1.3	0.7	0.4	0.5	0.5	1.9	2	0.3	1.4	1.6	0.7	0.6
FBgn0029830	0.7	0.8	1.3	1.2	0.4	0.7	0.7	1.3	0.3	1.8	1.4	2.4
FBgn0035968	2.9	1.3	0.1	0.4	31.1	0.3	0.5	0.2	19.1	18.4	4.1	1
FBgn0011745	1.3	1	1.9	1.8	1.9	1.1	0.5	1.4	2.6	1.1	1.9	0.9
FBgn0000723	1	2.1	2.2	4.9	5	0.2	0.4	1.3	3.7	0.6	1.3	2
FBgn0050438	0	0.3	0	0.2	0	0.1	0.1	30.6	0.1	0.1	0.1	0.2
FBgn0035903	35.9	8.8	0.3	0.4	0.4	0.3	0.1	0.9	0.6	0.4	26.4	0.8
FBgn0033984	2.2	0.8	0.4	0.8	1.1	2.4	0.4	0.4	8	0.6	1.5	0.4
FBgn0011653	0.1	0.5	0.7	0.3	0.6	0.2	1	1.2	0.3	1.1	0.2	1.6
FBgn0000404	0	0	0	0	0	1.9	0.2	0	0	0.1	0	0.1
FBgn0039025	1.1	1.2	0.7	2.1	1.2	1.3	1.8	1.5	1.5	0.7	1.3	1.2
FBgn0010300	0.1	0	0.1	0	0.1	4.2	0.1	0.2	0.2	0.5	0.1	0.1
FBgn0003499	8.2	2.5	0.4	1.1	0.2	0.1	0.2	0.2	0.2	0.1	5.4	1.8
FBgn0016075	1.7	1.2	0	0.3	0.1	0.6	0.1	0.1	0.2	1.3	2.9	2.5
FBgn0042627	0	0	0	0	0.1	0	0	0	0	0	0.1	7.2
FBgn0010452	4.6	1.7	1	2	0.3	0.5	1	0.3	0.4	0.1	2.4	0.5
FBgn0037239	0.7	2.2	0.8	0.4	0.8	0.7	1.6	0.1	1.2	3.6	0.4	2.4
FBgn0016076	0.7	3.9	1.9	2.1	2.4	0.1	0.3	2.8	4	1.3	0.6	1.9
FBgn0031449	0.3	2.2	0.8	1.3	0.3	1.2	0.3	0.8	0.1	0.2	0.4	3.3
FBgn0030897	38.6	5	0.7	0.6	0.7	0.1	0.2	2.1	0.4	0.4	38.7	0.7
FBgn0032087	0	0	3.3	1.9	1.2	0	0	0	0.7	0	0	0
FBgn0030437	2.7	1.2	1.7	1.5	0.7	0.4	0.7	2	0.6	1.4	1	1.6
FBgn0035142	6.2	1.3	2.3	2.6	0.5	1.5	0.5	1.6	4.2	1.1	5.4	1.5
FBgn0011554	0	0	12.5	2.4	0.1	0	0	0	0.1	0.3	0	0
FBgn0031248	0	0	11.1	0	0	0	0.2	0.1	0.1	0.1	0	0.1
FBgn0016131	0.2	0.6	0.4	0.3	0.1	2.1	0.1	0.1	0.2	0.1	0.2	0.4
FBgn0036262	0.5	2.2	0	0.5	0.1	0	0	0	0	1.7	1	3.3
FBgn0034137	0.2	0.8	0.2	1.2	0.1	0.1	0.2	0.8	0	0.2	0.4	4.5
FBgn0005617	2.5	1.1	0.8	1	1.1	2.5	0.2	1.4	1.2	1.1	2	0.8
FBgn0030357	0	0.8	1.9	2.8	1.5	0.6	1	1.2	2.4	1.4	0	1.8
FBgn0033757	0.1	0.1	0.1	0.1	0.1	2	0.1	0.1	0.1	0.2	0.1	0.2
FBgn0032965	0.1	0.1	0.4	0.1	0.3	0.1	11.2	0.4	0.5	1.1	0	0.1
FBgn0052549	1.8	2.5	1.3	0.9	2	0.6	0.5	0.3	2.2	6.4	1.7	2.9
FBgn0032088	0	0	11.2	0.6	1.2	0	0	0	0.8	0	0	0
FBgn0032771	0.1	0.1	0.1	0.1	0.1	0	14	0	0	1.1	0.1	0.1
FBgn0031976	1.2	2.6	0.4	1	1.1	0.7	0.8	0.9	1	2	1.2	3
FBgn0015721	6.4	1.9	1.5	0.5	0.5	0.3	3.7	4.3	0.5	1.3	3.8	0.8
FBgn0029762	0	1.5	3	11.3	4.4	0	1.9	0	2.3	0	0	1.2
FBgn0026401	1	1	1.2	1.8	1.8	1.4	0.8	2.1	2.2	1.9	0.8	3
FBgn0039424	0.5	0.3	0.8	1	0.7	0.4	0.7	0.4	0.6	0.6	2.1	0.3
FBgn0085370	2.5	1.2	1.8	2.7	1.5	1.8	0.4	0.7	1.7	0.7	1.5	1
FBgn0038331	2.2	2.1	1.6	3.8	2.5	1	0.7	1.4	2.5	0.6	2.1	1.3
FBgn0031398	0.7	0.4	0.4	0.2	0.5	2.4	0.2	1.3	0.4	0.6	0.6	0.3
FBgn0034724	0.4	2.4	0.2	0.5	0.2	0.8	0.1	0.2	0	0.1	0.4	2.4
FBgn0035398	0.3	0.8	0.2	0.4	0.2	0.2	0.1	0.4	0.4	0.4	0.1	2
FBgn0034321	0	0.1	0	0	0	0.2	0.1	0.1	0	0.1	0.1	4.4
FBgn0259231	1.9	2.7	1.7	0.7	0.9	1.2	0.8	1.5	1	1.3	2.8	2.2
FBgn0016754	5	1.8	1.5	1	0.7	2.5	1.6	0.5	0.6	0.7	3.3	0.9
FBgn0034253	0.3	0.6	0.2	0.9	0.2	0.9	1.6	0.7	0.2	0.5	0.2	1.4
FBgn0033818	0	0	0	0	0	0	11.3	0	0	1.8	0	0
FBgn0051702	0.4	0.2	0.3	0.2	0.3	0.2	11.7	0.1	0.1	2	0.3	0.2
FBgn0034135	14.7	7.1	0.6	0.4	0.2	0.1	0.7	0.5	0.1	0.2	18.1	1.2
FBgn0030766	0.4	0.3	0.1	0.7	0.1	4.1	0.4	0.5	2.2	0.1	0.3	0.2
FBgn0034050	1.2	1.3	1.2	1	0.7	2.4	1.8	1.2	1.1	1.8	2.1	0.8
FBgn0032876	1.6	0.7	0.2	0.5	0.4	2.5	0.1	0.6	0.5	0.8	1.5	0.5
FBgn0039530	10.6	3.4	0.3	0.3	0.4	0.6	0.8	0.4	0.3	0.6	8	1.1
FBgn0038581	7.2	3.1	0.4	0.2	0.2	0.4	6.2	0.3	0.2	1.1	7.5	1.2
FBgn0032193	1.2	1	0.5	0.7	0.5	1.6	2.1	1.2	0.9	1.9	1.1	0.5
FBgn0026438	8.1	9.1	0	0	0	0	0	0	0	0	7.5	1.3
FBgn0035901	0.5	0.3	0.5	0.4	0.3	2.1	0.5	0.7	0.2	0.3	0.3	0.4
FBgn0000405	0	0	0	0	0	1.6	0	0	0	0	0	0.1
FBgn0011723	0.3	0.3	0.5	37.6	0.8	0.2	0.4	1	0.7	1.4	0.3	0.6
FBgn0039970	0.9	1.5	1.7	1.3	1.7	0.9	0.1	1.7	0.9	0.6	1	1.6
FBgn0036729	0	0	0	0	0	0	13.5	0	0	1.1	0	0
FBgn0029608	0.9	2.9	8	1.8	0.9	0	0.2	0.3	0.1	0.1	1.2	2.2
FBgn0033524	0.3	0.4	0.7	47.7	0.3	0.1	1	7.9	0.2	0.1	0.1	0.3
FBgn0036661	0.5	0.5	0.5	0.4	0.4	1.9	0.9	0.3	1.2	1.3	1.1	0.7
FBgn0005775	38.2	7.2	0.3	0.7	0.4	0.2	0.2	0.6	0.4	0.4	24.9	0.4
FBgn0031592	1.4	0.4	0.3	0.3	0.5	0.6	8.2	0.7	0.3	1.1	1.4	0.3
FBgn0050502	0.1	0.2	13.2	3.9	0.9	0.1	0.1	0.1	0.2	0.1	0.1	0.4
FBgn0086368	0.3	1.7	1.1	5.8	1.1	0.3	0.8	8.3	1	1.1	0.4	1.8
FBgn0030137	0.7	0.5	0.4	0.3	0.3	1.9	0.1	1.4	0.6	0.4	0.6	0.2
FBgn0034628	0.1	0.7	4.2	2.1	4	1.6	0	0.1	1.2	1.8	0.2	1.2
FBgn0032986	1.9	1.1	1.7	1.3	2.4	1	1.3	0.9	2.1	2	1.9	1.1
FBgn0039862	5.5	2.6	3.8	1.6	2.1	1.3	1.4	2.5	0.8	3.8	2.1	0.9
FBgn0031829	0.3	1.9	0.6	0.2	0.2	0.1	6.6	0.4	0.2	0.7	0.4	1.2
FBgn0052792	19.1	5.1	2.3	1.6	2.1	4.4	1.3	1.5	3.1	7.6	30	2.9
FBgn0262579	0.8	1.3	0.9	1.2	0.9	0.7	0.6	0.9	2.7	2.5	0.9	2.3
FBgn0032271	0.1	0.3	0.3	0.1	0.2	0.2	6.1	27.8	0.2	1	0.1	0.5
FBgn0038679	1.3	1.9	0.4	1.9	0.2	0.6	1.4	0.2	0.1	0.3	2	1.4
FBgn0036007	0.5	1.5	0.7	0.6	2	0.9	0.1	0.6	0.1	0.5	0.4	1.2
FBgn0036801	2.3	1	2.7	1.8	2	2	0.2	0.6	0.9	0.1	2.1	0.4
FBgn0001991	14.6	2.5	0.4	1.8	0.1	0	0.7	31.5	0.1	0.2	10	2.5
FBgn0034045	0.6	2.1	5.9	4.6	9.2	0.1	0.1	0.1	5.1	0.5	0.7	3.3
FBgn0051678	4.2	1.9	0.9	1.2	1.4	1.7	0.6	2.6	2.4	1.2	5.3	0.8
FBgn0037529	1	1.5	1.1	1.7	0.7	1.2	0.3	0.7	1.1	0.9	1.7	1.4
FBgn0034512	0.3	2.9	0.1	1.4	0.4	0	0.1	3.1	0.2	3.1	1.3	3.8
FBgn0086895	0.7	0.5	0.5	0.7	0.5	2.4	0.2	0.4	0.6	0.4	0.7	0.3
FBgn0022786	0.6	0.3	0.8	0.5	1.9	2.3	0.6	0.7	1	0.7	0.5	0.4
FBgn0008636	116	24.4	8.4	5	3	2.9	1.4	1.6	4.1	3.1	2.7	5.1
FBgn0037082	1	0.6	0.5	0.4	0.6	2	2.2	0.5	0.9	0.9	0.8	0.5
FBgn0032156	0.7	1.5	0.5	2.6	1	0.1	0.3	0.8	0.4	0.1	1.3	2.7
FBgn0036196	3.5	1.7	3	2.8	2.2	0.7	3.1	4.4	2.6	0.9	3.1	1.7
FBgn0003997	1	1.3	1.4	1.6	0.4	1.1	0.5	1	0.1	0.4	0.7	1.5
FBgn0037726	0.6	3.5	2.2	0.6	0.6	0.2	4.5	4.3	1.5	2.1	2.5	5.6
FBgn0025741	0.5	0.6	0.8	0.7	0.9	2.6	0.7	0.7	1.9	1.5	0.5	0.5
FBgn0051869	1.7	1.7	0.2	0.2	0.2	0.9	0.2	0.2	0.3	0.4	6.3	0.4
FBgn0039282	32.6	8.2	0.5	0.2	0.3	0.2	0.2	0.5	0.4	0.6	19.8	0.3
FBgn0051294	0	0	0	0	0	0	11.8	0.1	0	1.9	0	0
FBgn0053144	3.1	1.7	2.1	3.7	1.3	1.2	1	1.1	2.8	0.6	2.5	1.9
FBgn0039008	0.1	1.3	0.9	2	0.1	0	0.3	0.6	0.1	0.1	0.1	3.1
FBgn0028518	0	0	14.6	2.4	8.5	0.1	0	0.1	16.5	0.1	0.1	0.1
FBgn0015776	0.1	1.1	1.2	2.7	4.1	1.1	0.1	0.6	2.1	0.4	0.1	1.2
FBgn0031702	1	2.9	0	1.4	13.2	0	0.1	11.8	2.9	12.5	0.7	3.1
FBgn0038058	1.2	0.9	1.2	1	1.8	1.7	0.3	1.3	1.9	1	1.3	0.7
FBgn0005658	25.4	5	0.1	0.8	0.8	0.3	0.2	0.7	0.5	0.9	9.7	1.2
FBgn0015286	0.7	0.7	2.2	1.4	0.9	2.2	0.2	0.8	2	1.8	0.6	0.6
FBgn0004107	0.3	0.1	0.1	0.1	0.1	2.4	0.1	0.1	0.1	0.1	0.2	0.1
FBgn0010497	0	0.1	3.3	2.5	3.4	1.1	0	0.1	0.2	0.3	0	0.1
FBgn0053459	0.8	0.9	0.4	1.1	8.3	0.4	0.8	1.6	90.4	179	0.7	2.3
FBgn0020621	1.2	3.2	0.8	0.7	0.6	1.4	0.2	0.6	1.1	0.6	1	1.1
FBgn0000017	1.2	0.7	0.5	1	0.6	1.6	1.2	1.2	0.6	0.6	0.9	0.6
FBgn0033853	0.4	1	0.8	2.6	0.7	0.7	0.2	0.8	0.5	2.9	0.5	3.9
FBgn0036909	0.6	0.4	0.4	0.2	0.6	1.8	0.3	0.8	0.5	0.4	0.4	0.4
FBgn0033636	1.9	0.7	0.5	0.8	0.7	3.7	0.4	0.6	0.5	0.4	1.3	0.5
FBgn0086673	1.2	1.2	1.5	1.8	0.6	0.7	0.8	2.4	1	1.6	1	0.7
FBgn0050338	0.6	1	1.4	1.4	1.2	1	1.5	1.9	1.8	1.1	0.7	1
FBgn0016031	0.8	1.2	0.8	0.9	7.6	1.2	0.3	0.5	0.8	1.6	0.5	1.9
FBgn0052150	0.7	3.4	0.8	0.8	0.5	0.3	1.2	1	0.6	1.3	1.3	2.8
FBgn0031660	0.9	1.1	1.7	1.5	1.6	1.1	0.7	0.8	1.7	0.9	1.2	1.8
FBgn0035245	57.9	7.3	0.6	0.5	0.3	0.5	1.4	0.4	0.3	0.2	48.9	0.2
FBgn0031523	0	0	0	0	64.1	0	0.1	0	47.8	0.1	0	0.1
FBgn0052406	32.4	7.3	0.1	0.2	0.2	0.2	0.3	0.6	0.2	0.1	25	0.3
FBgn0020443	0.2	0.5	0.8	1	0.9	1.8	0.5	2	1.3	1.2	0.3	0.8
FBgn0035916	1	0.6	0.6	0.5	0.7	2	0.2	1	1.4	2.7	0.7	0.7
FBgn0011695	0.1	1.7	0.7	2.1	0	0	0.2	0.1	0	0	0.1	1.9
FBgn0031374	1.1	1.4	0.7	1.7	0.7	0.9	0.5	0.9	0.6	0.3	0.8	1.7
FBgn0036150	3.6	1.3	0.4	0.7	0.5	0.6	0.7	3.3	3.2	1	1.1	1
FBgn0052195	2.3	1.4	1	0.5	30.2	0.3	0.1	0.6	25.7	0.2	2.9	1.3
FBgn0029823	0.4	1.6	0.4	0.4	0.5	1.1	0.1	2.3	1.2	8.5	0.4	1.7
FBgn0038960	0.1	0.3	0.1	0.1	0.1	0.1	11.7	0.1	0.1	1.3	0.2	0.2
FBgn0034624	0.3	2.1	0.5	0.8	0.6	1	0.3	0.8	0.7	0.8	0.5	5
FBgn0033794	0.1	0	0.1	0	0.1	0.1	15.6	0.2	0	1.5	0.2	0.2
FBgn0036224	0	0.2	0.5	0.3	0.1	0.2	13.7	0.2	0.3	2.4	0.1	0.3
FBgn0027518	0.7	0.5	0.6	0.5	0.9	1.6	0.3	0.7	0.9	0.7	0.7	0.7
FBgn0085203	0.6	0.4	0.4	0.7	0.8	2.3	0.3	1.3	1.5	0.5	0.5	0.5
FBgn0051205	0.1	5.6	0.1	0.1	0.1	0	0.8	0.2	0.1	0.3	0.2	6.8
FBgn0036467	0.1	0.3	0.2	0.1	1.2	0.1	0.2	1.7	0.1	8	0.5	1
FBgn0034585	1.4	1.1	1	0.9	1.2	1.8	0.9	1	1.1	0.8	1.8	0.9
FBgn0051718	2.5	10.1	0.5	1.3	1.5	2.2	1.9	4.1	1.5	1.7	2.1	2.8
FBgn0026563	0	0.1	0.1	0.1	0.2	0	10.8	0	0	0.9	0	0.2
FBgn0032946	9.4	6.1	0.4	8.1	0	0	0.1	0	0	0	11.3	0.5
FBgn0034776	0.1	0.1	0.2	0.1	0.1	0.1	10.5	0.1	0.1	0.6	0.1	0.2
FBgn0036449	0.5	1	3.5	1.7	0.5	1.2	0.3	0.3	0.3	1.5	0.5	1.7
FBgn0033054	8.2	9.4	0.1	0.1	0.1	0	0.9	0	0.1	0.2	10.3	1.3
FBgn0259481	8.7	9.8	0.1	0.1	0.1	0	0	0.2	0.1	0.1	10.2	0.3
FBgn0010222	0.7	1.4	0.3	1.9	0.4	1.2	0.8	1.2	0.6	9.3	0.8	1
FBgn0052392	0.8	0.5	0.1	0.1	0.1	0.1	13.5	0.1	0.2	1.8	0.8	0.3
FBgn0032609	0	0.1	0.1	0	0.1	0	12.7	0.1	0.2	1	0.1	0.1
FBgn0250816	0	0	0	0	0	2.4	0.4	0	0	0.1	0	0
FBgn0250862	0.1	0.5	0.4	0.5	0.2	0.2	1	0.4	0.2	0.2	0.2	0.5
FBgn0034826	0	0	0	0	0.1	0	12.7	0	0	1.4	0.1	0.2
FBgn0035543	1.2	0.9	1.4	1.5	1.5	1.2	2.1	1.9	2.6	2.5	1.6	4.7
FBgn0047038	1.1	1.1	0.9	1.5	1.1	0.5	0.6	0.8	0.8	0.3	1.4	2.1
FBgn0033726	0.9	0.9	1.5	1.3	1.4	0.5	0.5	1.8	1.3	2.3	0.6	2.3
FBgn0035343	0	0.1	0.1	0	31.9	0	0.1	0	40.2	0.2	0	0.1
FBgn0038752	1.9	1.6	3.1	17.6	2.4	0.1	0.5	0.1	0.6	0.2	1.9	1.9
FBgn0052111	0.3	0.9	1	1.5	2.2	1.5	1.1	2	1.2	3.6	2.5	3.2
FBgn0034093	1.3	1.2	2.7	6.3	17.4	0.6	0.3	0.5	5.1	4.8	1.4	1.3
FBgn0033141	0.1	0.2	0.1	0.1	0.1	0.1	14.8	0.2	0.1	2	0.1	0.2
FBgn0004914	0.3	1.2	1	1.9	1.3	1.1	0.2	0.8	0.8	0.8	0.3	2.9
FBgn0030027	0.2	2.7	0.5	2.1	0.6	0.5	0.8	0.4	0.7	0.9	0.3	0.7
FBgn0010317	0.3	0.1	0.1	0	0.1	2.7	0.1	0	0	0.1	0.2	0.1
FBgn0030484	0.1	0.8	7.9	6.4	0.1	0.2	0.1	0.4	0.1	1.7	0.1	2.3
FBgn0039495	0.1	6.5	0.1	0.6	0.3	0	0.2	0.1	0.2	0.1	0.2	7.1
FBgn0003174	0.8	1.4	2.6	0.2	0.7	2	0.7	1.8	1.2	0.7	0.5	1.1
FBgn0031301	0.2	0.2	0.9	0.3	0.2	0.2	12.9	0.1	0.1	1.9	0.4	0.3
FBgn0039676	0.8	0.8	1.1	0.6	0.7	0.7	1.5	2	0.4	2	1.5	2.5
FBgn0036426	0	0.1	0.2	0.2	0.1	0.1	13.9	0.1	0.1	1.3	0.1	0.2
FBgn0030078	0.7	0.2	0.5	0.7	0.5	0.2	9.5	0.3	0.4	0.8	1.1	0.2
FBgn0015300	0.1	0.1	0.1	0.1	0.1	0	11.6	0.4	0.1	2.1	0.1	0.1
FBgn0031129	0	0	0	0	0	0	10.3	0	0	1.3	0	0.1
FBgn0001206	0.7	0.4	0.4	0.3	0.2	2.3	0.5	0.4	0.2	0.3	0.5	0.3
FBgn0034770	1	0.6	0.8	0.8	2.7	0.5	0.5	1.1	1.6	0.9	0.7	2.8
FBgn0039350	1.4	0.4	0.1	0.5	0.5	2.6	0.2	0.2	0.1	0.1	1.1	0.3
FBgn0052702	2.5	1.2	4.1	2.4	2.1	0.8	0.5	2.1	8	3.3	2.7	8.5
FBgn0032495	0.2	1	0.1	12.7	0	0	0	0	0	0.1	0	0.6
FBgn0032479	2.9	1.7	0.9	1.4	0.7	1.3	0.2	0.9	1.4	0.8	3.4	0.9
FBgn0015600	3.8	1.7	0.4	1.3	0.2	1.9	0.2	2.2	0.5	0.2	2.8	1.2
FBgn0004885	6.8	3.8	0.1	0.2	0.1	0.1	0.8	0	0.1	5.9	2.5	2.7
FBgn0003495	0.6	1.6	0.1	0.7	0	2.5	0.2	0.2	0.1	0.7	0.8	1.4
FBgn0086347	0.3	0.6	5.9	1.9	0.8	1.1	0.5	0.4	3.2	0.3	0.5	0.5
FBgn0039302	0.5	0.4	0.3	0.4	0.5	2.5	0.6	1	0.6	0.3	0.6	0.5
FBgn0050158	48.5	9.5	0.1	0.1	0.1	0	0	0.1	0	0.2	20.1	0.1
FBgn0035160	0.6	0.6	0.5	0.6	0.9	2.1	0.4	10.1	0.7	4.3	0.9	0.8
FBgn0032132	1.2	1	2.2	1.3	1.9	0.9	1.1	0.9	2	3.2	1.8	2.9
FBgn0026439	5.7	4.1	0.9	1.2	0.7	0	0	0	0	1.6	4.9	3
FBgn0027600	0.3	1	0.5	0.3	0.2	0.6	0.2	0.4	0.3	0.7	0.1	2.4
FBgn0029155	3.5	1.4	6.7	1.3	3.1	1.3	0.8	0.6	2.3	0.2	3.9	1.5
FBgn0038840	1.9	1.1	0.7	0.3	0.2	0.1	0.4	0.4	0.3	0.2	1.8	3.5
FBgn0032664	0	0.1	0.1	0.1	0.1	0	14	0.1	0	2	0	0.1
FBgn0012034	0.8	2	1.3	1.6	2.6	0.3	0	0.2	0.4	1.8	0.7	3.1
FBgn0031170	1.6	0.7	7.4	2.9	0.8	0.9	0.2	0.8	0.6	0.1	1.2	0.9
FBgn0025693	0.5	1.5	6.1	2.1	3.3	0.7	0.8	0.6	2.6	1.7	0.8	1.8
FBgn0032482	1.4	1.5	0.4	1.2	0.6	0.8	2	3.1	0.3	3.4	1.8	2
FBgn0029962	23.6	4.3	0.6	0.5	1	0.2	0.5	1.4	0.6	1.2	41.5	1.7
FBgn0039214	2.1	1	0.7	1	0.5	1.6	0.6	1.2	1.1	0.9	1.9	1
FBgn0039612	0.6	4.4	0.6	0.6	0.5	0.1	0.3	0.4	0.2	8.5	0.5	5
FBgn0039827	0.4	2.3	0.3	0.6	15.8	0.4	0.3	0	10	12.8	0.5	2.7
FBgn0034540	0.6	3.6	0.4	2	1.7	0.5	1	0.7	0.5	32.3	0.5	11.4
FBgn0032666	24.6	10.6	0.3	0.5	0.5	0.1	0.3	0.1	0.2	0.3	22.2	2.2
FBgn0040251	5.2	2.1	2.2	0.9	0.8	0.7	0.7	1.4	0.5	0.9	4.4	1.1
FBgn0036038	0.7	0.7	0.7	0.8	0.9	1.6	0.4	1.7	0.9	0.7	0.9	0.6
FBgn0013763	0.2	2.6	0	3.7	0.1	0.5	0.1	0	0.1	5	0.7	3
FBgn0035941	0	0	6	1.2	28	0.1	0	0.1	0.1	0.1	0	0.1
FBgn0036381	3.3	2.1	2	1.9	10.1	0	0	0	2.2	16.3	1.8	1.8
FBgn0040363	0.4	0.3	3.1	0.7	0.5	0.6	0.7	0.8	0.6	0.7	0.4	0.6
FBgn0037926	1	0.8	0.7	0.8	1.1	1.8	0.4	1.8	0.4	0.3	1	0.8
FBgn0035557	0.2	1.5	0.2	37	0.2	0.9	0.2	0.3	0.2	0.2	0.1	0.3
FBgn0026238	0.9	0.6	0.4	0.5	0.4	2.2	0.1	0.5	0.7	0.8	0.9	0.3
FBgn0037623	3.2	1.6	0.2	3.1	11.3	1.3	0.6	1.4	5.8	3.5	3.3	0.8
FBgn0020294	2.5	2.2	1.1	2	0.5	0.4	0.3	1.8	0.5	1.6	2.6	1.2
FBgn0036222	0.2	0.1	0.2	0.2	0.2	0	13.5	0.3	0.2	1.3	0.1	0.2
FBgn0036838	0.4	0.3	0.2	0.5	0.4	1.8	0.2	0.7	0.4	0.9	0.4	0.4
FBgn0052066	1.4	0.7	1.5	0.8	1.2	1.2	0.2	0.3	1.4	0.6	0.9	0.4
FBgn0086779	0.5	0.4	0.2	0.4	0.2	2.1	0.9	0.6	0.3	0.5	0.4	0.4
FBgn0038585	0.7	0.4	0.4	0.3	0.4	1.8	1	0.9	0.2	0.3	0.6	0.4
FBgn0028579	2.4	1	0.5	0.6	0.5	1.6	2.3	0.6	0.6	0.8	2.1	0.7
FBgn0032233	28.7	8.3	0.4	0.2	0.1	0.1	0.1	0.7	0.1	0.2	26.3	0.4
FBgn0034709	0.1	1	2.6	1.6	1.4	0.5	0.7	3.9	3.6	0.3	0	0.8
FBgn0027655	2.8	1.9	1.5	1.9	1.7	0.9	0.5	1.8	1.6	1.3	3.1	1.3
FBgn0031926	0.3	2.9	0.4	0.4	0.5	0.7	0.8	1.1	0.6	1.9	0.4	2.4
FBgn0038993	0	0	0	0	0	0	13.5	0.1	0	1	0.1	0
FBgn0024236	0.8	1	0.8	0.6	0.5	2.5	0.1	2.2	0.5	0.4	0.6	0.8
FBgn0033740	0.1	0.1	0.1	0.1	0	2.9	0.4	0	0.1	0.2	0.1	0.1
FBgn0034072	12.2	2.1	0.8	0.7	0.5	0.6	0.7	3	1	0.9	11.7	1
FBgn0034718	0.7	1.4	4.4	3.1	3.4	0.2	1.1	0.2	2.2	1.4	2.8	1.8
FBgn0029719	3.2	1.7	1	1.7	1.5	1.2	1.3	2.2	0.8	0.8	2.8	2.8
FBgn0029810	26.9	9.5	0.1	0.1	0.1	0	0	0.1	0.1	0	30.1	0.3
FBgn0016977	6	1.8	1.7	2.4	2.2	1	0.2	1.5	2	1.6	4.8	1.3
FBgn0037081	3.3	1.1	0.7	0.8	0.8	1.8	0.9	1.2	0.9	0.6	2.6	0.9
FBgn0010416	0.8	0.7	0.9	0.7	0.7	2	0.4	1.7	1.1	1.3	0.8	0.5
FBgn0032085	0.2	0.4	15.1	2.4	0.5	0.1	0.6	0.7	0.8	0.7	0.3	0.9
FBgn0036816	0.4	1.1	1.3	1.5	1.1	1	0.7	0.3	0.4	2.7	0.7	2.4
FBgn0037698	9.4	1.5	0.9	0.9	1.3	1	1.3	0.5	1.3	0.6	5.1	1.6
FBgn0037963	1.8	1	0.1	0.6	0.1	2.8	0.1	0.7	0.4	0.1	3.2	0.6
FBgn0041087	1.9	0.7	0.3	0.1	0.1	2.4	0.1	0.3	0.1	0.1	2.3	0.1
FBgn0028487	1.4	1.4	0.6	0.9	0.9	0.7	6.4	0.9	0.8	0.7	1.3	1.2
FBgn0027568	0.9	0.6	0.5	0.7	1	1.4	2.4	1	1.2	1.1	0.8	0.4
FBgn0040601	0.7	1	3.7	1.4	0.7	0.3	0.5	1.3	0.9	1.7	0.9	1.7
FBgn0029943	1.5	0.8	1.5	1.2	1.1	2	0.2	0.7	2.2	1.1	0.8	0.6
FBgn0036795	0.1	0.1	0.1	0.1	0.2	0	0.4	123.8	0.1	0.2	0.1	0.4
FBgn0039804	1.7	4.6	2.6	0.9	0.6	0.3	0.7	1.6	0.2	0.4	2	3.2
FBgn0035400	3.5	1.2	1.5	1.9	2.7	1.3	0.5	1.6	10	0.5	2.7	0.8
FBgn0020248	0.1	0	0	0	0	3.7	0	0	0	0.1	0.1	0.1
FBgn0033987	6.8	2.6	1.3	3.4	4	0.7	0.3	3.6	1.2	0.2	4.4	0.9
FBgn0051016	0.4	0.6	0.9	0.4	0.6	0.2	0.4	127.1	0.3	0.5	0.4	0.8
FBgn0028875	18.7	2.6	0.8	0.9	0.6	0.3	0.2	0.5	1	0.5	12.3	1.1
FBgn0039085	0.1	0.1	13.1	3.6	16.2	0	0.2	0.2	3.7	0.1	0.1	0.2
FBgn0032364	0.3	0.4	0.2	0.6	0.4	0.3	15.1	0.3	1	2	0.6	2.9
FBgn0039379	0.6	0.3	0.2	0.4	0.3	1.8	5.3	0.5	0.3	1	0.4	0.3
FBgn0032369	0.2	0.1	0.1	0.2	0.2	0	16.8	1.3	0.1	2.4	0.1	0.1
FBgn0033543	0.7	2.7	2.1	1	5.7	0.2	0.1	0.9	5	4.6	0.8	3.2
FBgn0039232	10	4.6	0	0	0	0.3	0.2	0	0	0	0.5	1.6
FBgn0000015	0.5	0.5	0.833333	4.93333	1.16667	0.4	1.06667	1.8	0.666667	1.43333	0.966667	1.03333
FBgn0000036	4.05	1.1	1.35	1.1	1.4	0.55	1.75	3.25	0.9	1.25	3.2	1.85
FBgn0000038	37.65	4.35	0.25	0.65	0.75	0.3	0.2	1	0.75	0.5	40.45	0.65
FBgn0000053	0.45	1.45	0.55	0.85	1	1.1	0.5	0.6	1.15	14.75	0.5	1.5
FBgn0000114	0.1	0.2	0	0.65	0	2.5	0.9	0	0	0.4	0.1	0.3
FBgn0000250	1.4	1.05	0.6	1.75	0.85	1.35	0.7	0.65	1.6	1.15	1.05	1.05
FBgn0000259	1.4	0.35	0.7	0.55	0.35	2.5	0.35	0.9	0.85	1.1	0.85	0.5
FBgn0000273	3.05	0.95	0.85	1.55	0.55	1.25	0.25	0.75	1.7	0.45	2.05	0.9
FBgn0000307	2.55	0.85	0.55	0.7	0.6	2.25	0.9	0.65	1	1.15	2.6	0.55
FBgn0000384	0.4	0.3	0.35	0.3	0.2	2.85	0.35	0.8	0.45	0.65	0.35	0.3
FBgn0000463	0.25	0.6	0.7	1.5	0.2	2.25	0.2	0.15	0.1	0.2	0.2	0.45
FBgn0000504	0.45	1.6	1.45	1.85	3.3	0.2	0.35	1	0.75	1.75	1.3	3.3
FBgn0000542	0.933333	1.56667	0.7	2.46667	1.46667	1.06667	1.23333	1.1	1.2	1.06667	0.566667	1.2
FBgn0000568	6.6	1.86667	1.16667	1.1	0.766667	1	0.233333	0.9	2.73333	4.33333	3.8	1.83333
FBgn0000635	3.775	2.025	0.975	1.5	11.85	0.475	0.5	0.95	1.8	1.175	5.925	1.475
FBgn0001085	4.45	0.8	1.35	2.2	0.9	2.5	1.1	1.3	1.05	0.4	3	0.45
FBgn0001235	5.7	3.65	0.9	0.2	3.5	0.05	0.05	0.2	7.25	0.85	7.5	1.75
FBgn0001253	2.3	1.7	1	1.25	1.225	0.25	0.475	1.4	0.775	1.425	2.55	1.675
FBgn0001319	9.35	2.15	2.2	1.2	2.05	0.8	1.4	3.2	2.6	1.95	12.25	2.85
FBgn0001404	2.5	1	2.9	2.2	4.2	1.6	0.3	2.95	9.05	2.25	1.9	1.05
FBgn0001624	1.9	4.475	0.325	0.95	0.325	1.05	0.175	0.55	0.325	0.45	0.95	1.05
FBgn0001977	1.05	0.8	1.45	1.05	1.9	1.05	1.25	1.2	3.25	2.1	1.1	1.55
FBgn0002643	8.4	2.35	1.15	1.35	0.55	0.7	0.4	1.15	1.25	1.5	10.8	1.3
FBgn0002873	0.0666667	0.1	0.133333	0.166667	0.133333	1.76667	9.73333	0.233333	0.133333	1.5	0.133333	0.2
FBgn0002921	7.05	3.15	0.7	4.55	4.7	0.45	0.15	0.65	1.2	0.25	8.8	1.3
FBgn0003082	1.8	0.9	0.5	0.85	1.1	2.2	0.55	1	0.8	0.5	1.55	0.75
FBgn0003118	1.05	1.2	1.95	1.3	1.4	0.7	0.25	0.95	1.15	0.75	1.15	1.55
FBgn0003371	10.0667	4.33333	0.866667	1.3	2.43333	0.366667	0.6	1.13333	2.23333	1.93333	10.4333	1.53333
FBgn0003380	63.525	3.4	0.65	3.275	0.65	0.125	0.375	0.725	0.625	0.45	46.85	2.05
FBgn0003396	1.26667	1.4	2.2	1.3	1.3	0.633333	0.833333	3.2	3.4	1.66667	1.33333	3.4
FBgn0003415	1.3	0.65	0.4	0.8	0.45	4.15	0.4	0.55	0.75	0.6	0.7	0.55
FBgn0003475	5.66667	2.53333	1.8	1.43333	0.766667	1.53333	0.7	0.166667	1.3	0.566667	7.16667	0.9
FBgn0003651	1.9	2	1	2.2	1.1	0.133333	0.666667	0.566667	1.66667	7.06667	2.3	3.86667
FBgn0003975	2.2	0.3	0.25	0.25	0.55	0.05	0.2	0.25	0.15	0.35	3.35	5.3
FBgn0004198	18.35	1.95	0.55	1.45	22.5	1.2	0.4	1.15	27.6	1.3	13.65	2.1
FBgn0004227	7.7	2.5	1	1.56667	1.4	1.13333	0.3	1.73333	2.6	2.73333	6.3	1.13333
FBgn0004242	9.55	4.2	0.5	0.75	0.35	0.8	0.15	0.85	0.95	1.3	10.9	0.85
FBgn0004368	4.83333	1.3	0.533333	4.63333	0.666667	1.2	0.533333	0.8	0.566667	0.733333	2.4	1.76667
FBgn0004369	6.44	1.96	1.42	1.44	1.2	0.88	0.7	2.5	1.16	1.22	4.6	1.94
FBgn0004370	0.6	0.7	0.15	1.45	0.3	2.15	1.6	0.25	1.2	0.3	0.35	0.4
FBgn0004390	1.85	0.9	0.95	0.9	0.8	2.75	0.15	0.9	0.65	0.55	1.45	0.6
FBgn0004396	0.8	1.5	1.85	1.45	1.7	0.4	0.5	6.3	1.05	2.25	0.5	1.65
FBgn0004456	0.75	0.8	2	2.4	1.9	0.55	0.25	1.35	1.15	0.4	1.05	1.8
FBgn0004509	1.85	1.55	1.5	1.85	3.2	1.2	0.55	0.35	2.25	2.2	1.7	1.15
FBgn0004577	0.5	0.6	1.1	1.35	1.35	0.6	0.8	1.45	1.35	1.85	2.1	1.7
FBgn0004652	6.55	2.16667	0.733333	1.35	1.21667	0.7	4.26667	1.45	1.78333	1.68333	6.03333	2.11667
FBgn0004656	2.8	0.85	0.75	1	0.35	3.45	0.15	1	0.8	0.75	2	0.9
FBgn0004797	0.85	1.4	0.6	1.05	1.5	1.65	0.65	0.25	0.95	1.2	0.7	1.45
FBgn0004858	2.33333	2.06667	1.36667	5.03333	0.633333	0.3	1.03333	7.3	0.5	0.533333	2.56667	2.53333
FBgn0005536	2.95	2.1	1.85	3.5	0.85	0.25	0.35	1.5	0.8	0.3	2.3	2.6
FBgn0005632	1.06667	0.933333	1.2	1.2	2.03333	1.9	0.3	0.733333	1.46667	1.3	0.7	0.766667
FBgn0005640	0.9	0.75	1.1	0.95	1.45	1.6	0.7	0.9	1.35	1.5	0.9	0.6
FBgn0010217	0.85	1.1	0.95	1.35	0.95	0.85	0.1	0.35	1	0.65	1	1.95
FBgn0010431	0.8	0.55	0.55	0.5	0.4	1.85	0.5	0.65	1	0.6	0.85	0.45
FBgn0010473	22.1	2.3	1.82	0.94	1.72	0.78	0.96	1.7	0.88	2.42	16.88	3.74
FBgn0010482	0.1	0.7	0.5	2.3	0.1	0.05	0.1	0.35	0.05	0.6	0.15	3.8
FBgn0010905	2.83333	0.5	0.733333	0.366667	4.23333	2.36667	5.23333	0.4	0.933333	1.06667	2.4	0.233333
FBgn0011206	0.95	0.35	0.45	0.6	0.6	0.35	5.8	0.75	0.2	0.75	0.6	1.9
FBgn0011656	3.275	1.95	1.075	2.1	1.025	0.625	1.425	1.95	1.575	1.25	2.15	2.2
FBgn0011760	2.2	1.2	1.1	1.4	1.2	1.5	0.8	1.65	1.6	1.25	1.6	1.05
FBgn0011817	1.45	0.45	7.8	0.25	0.15	0.95	2.5	0.2	0.15	0.7	1.35	0.2
FBgn0011828	6.25	5.2	2.65	4.75	3.7	3	1.15	3.2	1.75	3.3	4.5	6.1
FBgn0013334	8.9	3.4	0.45	0.5	0.45	0.65	0.6	1.1	1	0.5	12.3	0.6
FBgn0013469	1.1	1.15	2.4	1.3	0.95	0.85	0.7	0.9	1	1	1.95	1.5
FBgn0013576	12.9667	0.766667	1.93333	1.26667	4.33333	1.56667	0.666667	1.9	3.53333	0.533333	8.1	1.4
FBgn0013718	1.8	2.4	0.65	1.95	0.85	0.5	0.95	0.6	0.9	2.55	2.5	2.2
FBgn0013751	3.2	1.2	1.3	0.95	0.9	0.45	0.25	7.3	0.95	1.65	1.1	0.75
FBgn0014020	1.05	1.4	1.75	2.25	2.45	0.85	0.55	2.05	2.65	1.95	1.15	1.4
FBgn0014135	0.733333	1.26667	2.6	4.1	4.93333	0.3	1.5	0.866667	2.03333	0.366667	1.2	1.5
FBgn0014343	1.95	0.7	1.75	0.45	0.25	0.6	0.85	0.7	0.15	1.55	2.5	2.6
FBgn0014388	3.85	1.35	3	1.55	0.9	0.3	0.3	0.6	0.5	1.1	4.4	1.25
FBgn0014859	13.85	3	0.55	1.35	0.7	0.7	0.2	16.05	0.85	0.95	7.1	1.7
FBgn0015278	1.7	1.35	2.1	1.75	3.65	1.4	0.2	0.9	6.6	0.55	1.8	1
FBgn0015524	8.2	1.55	1.6	24.05	1.75	0.95	1.95	2.8	1.45	2.4	9.2	3.1
FBgn0016081	2.3	1.35	1.55	3	0.55	0.9	2.6	0.55	0.55	1.05	2.25	1.4
FBgn0016797	2.4	1.925	1.925	1.575	1.25	0.475	0.775	1.8	2.55	4.775	2.15	1.675
FBgn0019650	26.6	5.86667	0.566667	0.433333	0.5	0.3	0.366667	1.66667	0.466667	0.866667	6.23333	0.666667
FBgn0019968	12.75	3.15	1.3	2.1	1.2	1.1	0.2	0.6	1.3	1.95	11.9	1.1
FBgn0020306	0.6	0.366667	0.7	0.5	0.566667	3.23333	0.366667	1.03333	0.766667	0.466667	0.466667	0.433333
FBgn0020307	1.85	1.35	5.85	0.9	0.7	0.35	0.15	8.15	1	0.45	2	1.35
FBgn0020521	0.3	2.5	0.633333	3.13333	0.233333	0.233333	0.3	0.433333	0.3	0.433333	0.433333	2.5
FBgn0020660	2	1.45	1.8	1.65	1.2	1.425	0.575	2.775	1.4	1.75	1.775	1.575
FBgn0022764	1.8	0.85	0.55	0.8	0.75	2.35	0.3	1.5	0.65	0.55	1.4	0.8
FBgn0022942	3.2	1.35	0.55	0.65	0.7	1.75	0.15	0.85	1.1	0.95	2.5	0.6
FBgn0023095	1.25	1.05	1.5	2.65	0.45	0.25	0.35	3.3	2.3	1.95	1.1	2.35
FBgn0023407	3.8	1.15	0.95	3.05	0.65	0.85	0.35	0.25	0.35	0.5	2.95	1.05
FBgn0023479	2.6	3.43333	0.366667	0.7	0.3	0.1	0.266667	0.466667	0.333333	14.5667	2.96667	3.93333
FBgn0024944	9.76667	2.76667	0.233333	0.566667	0.4	1.33333	0.366667	2.76667	0.3	0.566667	6.06667	0.766667
FBgn0024963	24.8333	5.2	1.76667	1.53333	2.83333	0.966667	1.33333	1.5	1.73333	0.766667	17.0333	2.76667
FBgn0024989	0.6	0.95	0.45	1.5	0.5	0.5	0.4	1.3	0.6	0.3	0.55	1.45
FBgn0025394	1.45	1.25	1.4	1.35	1.1	1.05	0.25	1.5	2.15	1.4	2.1	1.8
FBgn0025595	0.25	2.7	0.2	0.35	0.2	0.1	0	0.25	0.15	7.3	0.25	4.2
FBgn0025879	1.6	2.1	0.45	2.3	0.75	0.25	0.45	2.35	0.1	0.2	2.95	2.55
FBgn0026179	1.8	1.1	1.5	1.55	1.7	0.75	0.4	0.7	2.05	1.25	1.5	1.3
FBgn0026319	2.2	2.75	3.15	1.5	1.5	1.05	1.05	2.7	1.65	1.45	1	2.1
FBgn0026404	1.1	0.55	0.7	0.5	0.75	1.9	0.65	1.45	1.5	0.95	1.55	0.5
FBgn0026411	22.05	3.4	0.5	0.35	0.5	0.15	5.05	0.7	0.5	0.45	16.45	1
FBgn0027279	4.94	1.24	1	1.4	2.34	1.58	2.32	1.06	1.68	1.36	3.78	1.24
FBgn0027492	0.25	0.25	0.4	0.5	0.45	2.1	0.15	0.25	0.85	0.3	0.15	0.55
FBgn0027580	0.4	1.75	0.85	1.45	0.9	0.7	0.65	0.05	0.65	4.9	0.45	3.1
FBgn0027596	2.36667	2.86667	2.36667	2.66667	1.93333	0.866667	3	1.66667	1.33333	1.43333	2.6	2.1
FBgn0027598	26.65	3.35	2.25	2.15	1.8	1.05	0.8	1.4	1.65	1	19.55	1.5
FBgn0027654	20.8	7.33333	1.23333	2.5	1.76667	0.566667	0.766667	2.93333	1.73333	3.3	10.6333	2.3
FBgn0027790	0.233333	6.13333	0.266667	6.36667	0.0666667	0.1	0.0666667	0.1	0.133333	0.166667	0.166667	3.93333
FBgn0028369	4.4	2.05	0.45	1.5	0.5	0.55	0.55	0.35	0.65	0.9	3.55	2.45
FBgn0028394	0.2	1.1	2.85	8	4.6	0.95	0.55	2.45	10.8	0.8	0.15	0.9
FBgn0028496	10.65	2.75	1.45	2.05	2.4	0.2	1.25	2.55	2.55	0.85	2.95	2.05
FBgn0028541	0.85	0.75	0.65	0.6	1.1	0.75	7.45	2.35	0.9	1	1.1	0.9
FBgn0028888	8.96667	3.16667	0.966667	1.1	0.666667	0.266667	0.333333	0.8	1.06667	0.533333	5.46667	1.43333
FBgn0028916	2.6	0.8	0.4	0.35	1.4	1.4	0.4	0.2	0.45	0.45	2.4	0.35
FBgn0029504	2.7	1	0.9	2	1.15	2.15	0.3	1.8	0.8	1.1	2.2	2.35
FBgn0029525	4.06667	1.2	1.1	0.866667	0.733333	1.3	0.633333	1.36667	0.733333	0.8	3.4	1
FBgn0029657	0.05	0.35	0.2	0.15	0.1	0	14.15	0.55	0.05	1.95	0.1	0.55
FBgn0029728	0.25	0.35	0.5	0.55	0.3	0.2	12	0.35	0.3	3.25	0.25	0.9
FBgn0029761	28.325	3.175	1.3	2.225	1.35	0.625	1.3	1.4	1.5	1.025	20.4	2.275
FBgn0029768	3.3	1.45	0.65	1.1	1.7	0.25	0.3	1.25	0.3	0.75	7.2	0.9
FBgn0029930	8.35	2.7	1.7	1.05	0.6	0.45	0.8	2.8	0.95	1.1	6.45	2.15
FBgn0029939	3.25	1.525	1.275	0.975	1.075	0.9	0.95	1.675	1.975	1.375	1.25	1.975
FBgn0030065	0.2	1.15	0.7	0.8	0.45	0.7	0.45	1.4	0.6	0.35	0.45	1.1
FBgn0030662	2.35	1.55	2.15	3.15	1.5	0.5	0.5	1.05	3.55	8.7	3.05	1.65
FBgn0031064	3.85	0.65	0.6	0.4	0.7	0.4	1.3	0.7	0.9	1.3	2.1	0.75
FBgn0031294	9.3	4.3	1.05	0.7	0.3	0.55	0.6	2.6	0.5	0.4	6.65	1.3
FBgn0031299	4.1	1.9	1.05	2	2.3	0.35	0.45	1.5	1.75	0.6	3.85	1.4
FBgn0031384	4.3	1.35	1.85	1.85	3.05	2.35	3.25	8.15	1.95	2.6	6.6	5.65
FBgn0031414	4.425	3.025	0.95	0.975	1.1	0.55	1.15	1.075	0.95	1.725	3.875	1.225
FBgn0031466	0.8	2.85	1.7	2.3	0.95	0.65	1.15	2.2	1.15	1.7	1.15	4.5
FBgn0031530	6.45	3.95	3.05	1.15	3.75	0.3	0.45	1	3.7	0.4	5.75	1.3
FBgn0031721	0.05	0.05	0.15	0.1	0.05	0.1	13.1	0.05	0.1	1.6	0.05	0.15
FBgn0031850	0.15	2.95	0.7	0.1	0.1	0.05	3.65	0.15	0.1	0.9	0.15	1.7
FBgn0031866	22.3	4.1	0.2	0.4	0.3	0.2	0.4	0.3	0.7	0.45	14.3	0.35
FBgn0031879	0.4	1.25	0.6	2.9	0.65	0.4	0.75	1.45	1	0.6	0.45	1.6
FBgn0031897	0.5	1.03333	1.23333	0.7	1.2	0.6	1.4	0.5	0.9	2	0.4	1.33333
FBgn0031903	2	1.45	0.65	1.25	0.95	0.7	0.7	1.45	0.35	1.05	0.6	1.9
FBgn0032010	0.45	1.6	0.1	1.35	0.1	0.05	3.7	0.25	0.1	0.5	1.1	3
FBgn0032061	0	0	0	0.05	0.05	0	10.95	0.05	0	0.8	0	0.1
FBgn0032120	0.8	0.633333	1.6	0.766667	0.5	1.86667	0.666667	1.03333	0.933333	1.23333	0.833333	0.966667
FBgn0032297	4.55	3.35	0.2	1.35	0.4	0.25	0.45	0.2	0.4	1.2	3.6	2.3
FBgn0032536	0.2	3.8	0.25	0.8	0.35	0.2	0.25	0.15	0.3	0.5	0.3	2.65
FBgn0032629	20.35	5.7	0.8	0.95	0.35	0.65	4.55	1.25	0.4	1.3	22.35	1.1
FBgn0032911	5.85	5.4	0.25	1.1	0.25	0.05	0.9	0.3	0.2	0.2	7.25	2.7
FBgn0032938	4.95	1.75	2.3	0.85	0.8	1.3	0.7	0.95	1.15	1.05	3.85	1.3
FBgn0032957	13.9	1.85	0.85	1.3	1.6	1.55	0.9	1.25	2.05	0.9	7.75	1.05
FBgn0033159	6.3	2.95	1.85	1.85	1.4	0.15	0.8	2.05	1.1	1.4	6.3	1.45
FBgn0033212	1.23333	0.533333	1.9	1.3	1.86667	1	1.1	2.26667	2.7	1.5	1	1.76667
FBgn0033438	5.55	2	1.9	0.7	0.55	0.55	0.55	0.8	0.6	1.4	3.75	1.6
FBgn0033518	0.15	1.3	2.9	0.8	1.8	0.2	3.95	0.2	0.75	3.65	0.25	1.5
FBgn0033668	1.4	2.75	3.65	2.25	1.65	0.9	0.7	1.65	1.1	6.45	1.25	3.7
FBgn0034013	7.25	2.15	0.35	0.65	0.6	0.55	0.5	0.4	0.75	0.7	5.4	0.85
FBgn0034075	0.25	0.75	0.3	2.2	1	0.2	0.3	0.55	1.55	0.15	0.35	2.9
FBgn0034286	16.1	3	0.85	1.05	0.85	0.45	0.9	1.7	0.85	1	10.75	1.15
FBgn0034389	3.65	1.15	0.85	1.1	0.35	1.3	0.45	0.4	0.25	4	2.5	1.75
FBgn0034408	3.05	2.3	0.65	1.55	1.1	0.45	0.55	2.35	0.5	0.4	3	2.95
FBgn0034420	1.1	1.55	0.65	3.45	0.2	0.45	0.15	3.05	0.4	0.15	1.2	2.8
FBgn0034795	0.7	1.2	0.45	0.65	0.25	1.4	0.2	0.45	0.75	1.15	0.6	2.05
FBgn0034903	0.3	0.466667	0.333333	1.06667	0.433333	0.733333	0.433333	0.566667	0.4	0.666667	0.566667	0.733333
FBgn0035049	0.666667	2.03333	3.53333	3.6	2.5	0.133333	0.933333	0.5	7.5	2.43333	1	2.36667
FBgn0035094	0.1	0.1	9.55	2.2	6.2	0.1	0.2	0.35	6.7	0.25	0.2	0.2
FBgn0035290	0.5	4	0.95	1.1	0.3	0.4	0.35	1.35	0.5	12.6	0.55	2.65
FBgn0035427	0.15	0.95	0.15	0.85	0.3	0.7	0.35	0.4	0.2	0.3	0.65	0.85
FBgn0035581	0.54	0.86	1.54	1	2.66	1.46	5.26	1.22	0.94	2.2	0.9	1.8
FBgn0035586	0.4	0.75	0.9	1.55	0.3	1	0.3	1	0.3	0.5	0.4	3.6
FBgn0035756	16.5333	3.1	1.86667	1.4	1.06667	0.6	3.53333	1.8	0.933333	1.13333	8.66667	1.63333
FBgn0035802	0.8	1.06667	1.3	3.26667	0.933333	1.2	1.16667	1.06667	0.9	1.66667	1.2	1.6
FBgn0035815	0.2	2.25	0.5	28.55	1.45	0.15	0.3	0.35	0.1	0.25	0.3	1.8
FBgn0035989	5.2	2	0.6	0.95	0.65	1.2	0.95	1.65	2.3	0.65	6.5	0.9
FBgn0036043	5.05	1.25	3.2	0.95	0.1	2.1	0.45	0.2	0.25	0.15	4.6	0.35
FBgn0036211	1.35	1.75	1.2	2.3	1	0.85	0.5	2.75	1.05	0.95	1.55	1.85
FBgn0036302	3.1	1.7	2.6	2.9	1.85	1.75	0.8	3.1	2.3	2.5	2.25	1.15
FBgn0036382	0.65	0.75	0.2	4.1	0.15	1.95	0.35	0.3	0.15	0.4	2.8	0.4
FBgn0036391	4.36667	1.56667	1.13333	0.9	0.933333	0.533333	1.06667	1.1	0.833333	0.833333	3.5	3.33333
FBgn0036518	1.65	0.2	0.55	0.65	0.4	2.8	0.65	0.45	0.65	0.5	0.85	0.5
FBgn0036544	20.5	4.85	1	0.85	1.05	0.35	0.45	2	0.45	0.45	20.9	1.65
FBgn0036844	7.55	1.9	0.95	1.5	1.1	1.4	0.2	0.35	0.7	0.5	5.15	0.95
FBgn0036851	3.6	1.75	2.9	1.6	0.9	1.45	0.8	1.75	0.7	1.15	0.8	2.3
FBgn0036926	20.85	7.45	0.35	0.8	0.45	0.4	0.2	0.4	0.4	0.5	15.7	0.85
FBgn0037015	28.35	5.65	0.35	0.85	0.65	0.1	0.2	0.7	0.15	0.4	15.05	0.7
FBgn0037040	0.05	0.1	0	0	0.05	0.05	14.7	0.25	0.05	1.65	0.05	0.15
FBgn0037171	4.85	1.2	0.7	1	1.9	0.85	0.95	2.35	0.6	4	3.05	1.5
FBgn0037174	0.8	0.45	12.85	1.7	0.4	0.2	3.1	0.3	0.3	0.55	0.55	0.35
FBgn0037326	2.75	1.075	1.225	0.75	0.875	0.725	3.025	1.625	0.925	1.175	1.65	1.35
FBgn0037525	19.3	1.15	0.5	0.55	0.5	2.2	4.4	0.7	0.45	1.1	16.5	0.8
FBgn0038063	2.75	1.45	0.65	1.05	0.65	0.7	1.4	1.55	0.55	0.95	1.8	1.95
FBgn0038294	0	0.85	0.45	1.45	0	0	0.05	0.45	0	0	0.1	2.2
FBgn0038826	1.4	0.9	0.45	0.75	0.35	0.05	5.6	0.75	3.45	3.8	1.85	0.85
FBgn0038842	0.4	1.35	1.25	4.8	3.9	0.4	0.6	0.4	6.8	0.7	0.45	2.5
FBgn0038878	0.266667	4.46667	3.4	0.9	0.1	0	1.96667	0.0666667	0.166667	2.16667	0.3	3.5
FBgn0038983	0.05	1.15	0.15	0.5	0.05	0.5	0.05	2.45	0.05	0.05	0.05	0.6
FBgn0039157	5.3	2.45	1.05	1.25	1.2	2.6	0.25	1	1.2	1.35	2.55	1.75
FBgn0039198	1.76667	1.16667	1.83333	1.63333	1.5	0.733333	2.8	1.63333	1.86667	2.13333	1.7	2.63333
FBgn0039396	2.7	1.2	2.4	1.5	0.9	0.8	0.6	1.3	1	2.9	2.35	2.65
FBgn0039566	0.95	0.5	0.45	0.6	0.45	1.75	0.3	0.85	0.75	0.8	0.85	0.5
FBgn0039584	37.7	5.3	1.45	0.45	0.8	0.25	0.35	1.45	0.9	0.95	42.65	1.35
FBgn0039690	1.13333	1.46667	2.1	1.43333	1.43333	0.566667	0.366667	2.1	1.03333	0.833333	1.06667	2.06667
FBgn0039844	3.75	2.6	0.95	1.35	0.75	0.5	0.5	0.2	1.6	5.2	3.85	1.9
FBgn0039927	10.35	3.1	1.2	1.6	3	0.35	0.5	1.65	2.05	0.4	8.7	1.6
FBgn0040318	2.4	1.35	1.75	0.65	1.25	0.3	6.05	1	0.55	1.8	10.75	1.55
FBgn0040397	1	1.175	1.15	1.45	1.45	1.25	0.325	0.775	1.95	0.825	1	1.3
FBgn0040726	12.3333	2.2	3.63333	2.66667	1.93333	0.633333	1.46667	4.03333	1.5	5.56667	5.8	2.23333
FBgn0040752	3.1	1.1	0.75	0.9	0.4	2.05	0.3	4.7	0.5	0.15	3.65	0.85
FBgn0040765	2.9	1.15	1.55	1.55	0.5	0.7	0.75	2.2	1.35	3.1	2.65	1.55
FBgn0040849	0.85	1.05	0.45	0.4	0.8	0.6	2.9	1.05	0.45	1.45	0.8	1
FBgn0041111	2.03333	0.7	1.46667	1.66667	0.833333	1.23333	5.66667	1.46667	1.2	1.93333	1.3	1.6
FBgn0041585	1.2	1.1	0.4	1.15	2.35	2.5	0.45	0.6	1.1	0.85	1.3	1.1
FBgn0041627	0.5	0.75	0.95	3.95	1.6	1.05	5.45	0.8	0.75	0.85	0.7	1.3
FBgn0043069	0.5	0.25	0.15	0.35	8.05	1.8	0.1	1.55	10.35	44.35	0.55	0.1
FBgn0043070	10.3	3.8	0.7	1.5	0.966667	0.6	1.26667	1.5	0.9	0.5	10.2	1.46667
FBgn0045852	2.55	0.7	1.65	1.15	0.9	0.55	3.55	8.8	0.6	1.85	0.7	1.15
FBgn0046692	1.6	0.9	0.7	0.75	0.45	2.2	0.5	0.9	0.9	1	1.55	0.5
FBgn0050460	0.7	0.8	0.5	1.8	0.7	0.3	5.4	1	1.7	1.4	1.1	1.2
FBgn0050463	1.35	0.7	3.2	2.95	2.3	1	0.9	6.55	2.3	0.7	1.05	1.45
FBgn0051145	2.4	2.4	2	2.45	1.8	0.4	0.55	5.25	1.8	3.15	2.5	3.5
FBgn0051358	0.433333	0.566667	0.933333	0.566667	0.733333	0.5	9.86667	0.666667	0.566667	1.83333	0.3	0.6
FBgn0051386	0.75	0.6	1.85	1.7	1.75	0.85	1.3	1.85	1	1.8	1.15	3.2
FBgn0051439	4.7	3.15	3.65	3.45	4.75	2	1.65	7.15	4.35	5.85	5	1.9
FBgn0051619	21.8667	6.96667	0.866667	0.633333	0.466667	0.366667	0.7	0.5	0.333333	0.7	39.6667	0.8
FBgn0051809	0.15	3.3	4	12.1	0.4	0.1	0.1	0.15	0.25	0.2	1.6	2.1
FBgn0052204	21.95	3.85	1.35	0.7	0.65	0.55	0.9	1.15	0.4	0.65	7.95	0.95
FBgn0052227	13.95	4.45	0.55	0.7	0.85	0.35	0.45	0.75	1	0.85	11.3	1
FBgn0052311	0.657143	1.42857	0.642857	3.11429	0.8	0.314286	0.714286	2.55714	0.742857	0.642857	0.885714	2.77143
FBgn0052423	17.6667	1.63333	0.966667	1.4	1.13333	1.5	0.933333	1.26667	1.86667	2.13333	9.7	1.23333
FBgn0052425	1.13333	0.866667	0.266667	0.433333	0.4	1.03333	0.4	1.4	0.433333	1.33333	0.9	1.03333
FBgn0052451	7.5	4.5	1.1	1.2	0.8	0.35	5.75	4.25	1	1	8.5	2.05
FBgn0052521	2.9	2.8	0.2	0.8	0.15	1.45	0.1	0.35	0.25	2.55	2.7	2.2
FBgn0052600	21.0333	3.56667	0.9	1.13333	1.23333	1.03333	0.6	1.5	0.966667	1.2	9.6	1.3
FBgn0052652	0.533333	0.833333	0.733333	0.866667	0.833333	0.1	2.8	1.06667	1	1.16667	0.766667	1.46667
FBgn0052677	12.8	2.3	0.866667	0.366667	0.833333	0.566667	0.6	1.16667	0.933333	0.8	9.26667	1.83333
FBgn0052843	7.45	1.75	5.15	1.8	22.8	0.15	0.2	0.55	1.1	0.75	6.25	0.65
FBgn0052982	4.06667	1.6	2.03333	2.86667	1.06667	0.333333	0.9	1.16667	1.03333	1.2	4.73333	2.1
FBgn0053054	0.833333	0.966667	1.06667	1.8	1.83333	0.5	5.83333	1.1	1.63333	1.66667	1.23333	1.6
FBgn0053087	1.5	1.03333	2.46667	0.8	0.966667	0.933333	0.366667	1.26667	1.53333	3.8	1.3	1.13333
FBgn0053181	2.65	0.95	4.3	0.25	1.7	1.4	0.35	2.45	1.75	0.05	3.35	0.25
FBgn0053207	1.6	0.6	0.75	1.3	2.5	0.35	0.85	1	2.65	0.85	1.35	0.95
FBgn0053208	2.85	1.1	0.35	0.85	0.05	2.25	1.75	0.3	0.75	2.95	1.7	1.3
FBgn0053281	0.15	0.3	0.2	0.2	50.2	0.05	6.3	0.3	97.3	0.35	0.1	0.55
FBgn0053516	4.96667	1.33333	2.03333	1.76667	1.1	0.866667	1.03333	15.4	1.56667	1.8	3.56667	1.83333
FBgn0053517	41.7	3.75	1.3	0.3	0.55	0.15	0.45	0.4	0.45	0.45	28	1.2
FBgn0053523	0.55	1.3	3.05	4.8	0.4	0.5	2.5	1.15	0.45	0.8	0.55	1.25
FBgn0053531	3.425	1.3	1.425	1.3	0.975	0.65	1.05	1.4	1.2	2.175	2.75	1.475
FBgn0053554	2.1	0.8	1.05	0.95	0.65	1.75	0.55	1.85	0.95	1.45	1.4	0.65
FBgn0053556	1.25	1.65	0.55	3.7	0.75	0.35	0.4	1.5	0.55	0.15	1.9	3.65
FBgn0053696	12.55	2.8	1.2	1	0.9	0.4	1	1.5	0.95	2.25	4.8	2.6
FBgn0053970	0.2	2.75	0.7	12.45	0.2	0.15	0.25	0.15	0.05	0.1	0.25	2
FBgn0053988	28.55	4.8	1.1	1.05	0.7	0.7	1.4	1.45	0.75	0.8	27.9	3.55
FBgn0053993	1.25	1.3	1.5	0.9	2.3	0.6	0.55	1.15	1.2	0.5	0.95	0.7
FBgn0054041	0.2	0.1	0.15	0.1	0.15	0.05	0.2	101.4	0.1	0.05	0.05	0.2
FBgn0058178	9.66667	5.4	1.3	1.1	0.433333	0.7	0.5	1.96667	0.933333	1	5.73333	1.63333
FBgn0083940	0.9	3.16667	1.13333	1.56667	1.86667	1.1	1.26667	3.7	4.46667	2.1	3.03333	2.53333
FBgn0083945	0.5	0.48	0.52	37.34	0.6	0.22	1.7	0.82	0.54	0.86	0.32	0.76
FBgn0083949	2.1	1.3	1.45	2.075	1.35	1.1	1.825	2	1.225	2.55	1.8	4.175
FBgn0083950	14	2.35	0.55	0.8	1.1	1.35	2.55	3.2	0.75	1.1	6.3	2.2
FBgn0083963	4.9	2.475	1.425	1.3	1.575	0.7	1.725	3.175	1.225	2.45	3.95	1.525
FBgn0083975	5.53333	1.93333	0.5	1.4	1.26667	0.933333	2.2	2.03333	0.8	1.03333	3.23333	2.16667
FBgn0083979	1.2	0.8	5.1	1.7	1.95	0.8	1	2.35	1.25	1.95	0.7	3.45
FBgn0083981	0.85	2.1	2	1	1.35	0.55	0.75	3.15	1.95	2.25	1.05	2.1
FBgn0085369	5	1.4	1.15	1.2	0.7	0.55	0.7	1.75	1.65	1.4	4.2	1.25
FBgn0085374	0.3	0.95	0.5	1.05	0.7	0.45	0.75	65.25	0.8	0.45	0.65	0.8
FBgn0085376	3	1.38	1.38	1.8	1.54	0.98	1.14	2.56	2.74	1.9	2.2	2.6
FBgn0085380	11.15	3.7	2.05	1.4	1.5	0.9	0.55	2.7	1.55	1.55	4.3	1.95
FBgn0085382	6.26667	2.5	1.3	0.966667	0.766667	0.533333	0.6	0.966667	1.03333	1.56667	4.2	1.23333
FBgn0085383	9.73333	1.13333	1.06667	1.76667	1.4	0.933333	1.53333	1.73333	1.1	2.33333	10.6	1.5
FBgn0085384	5.6	2.5	1	1.55	0.95	0.35	1.35	0.7	1	1.15	4.15	1.95
FBgn0085385	22.4	4.35	1.3	0.85	1.75	0.5	0.55	2	1.45	3.1	10.45	3.25
FBgn0085386	5.9	1.925	2.125	1.4	1.275	0.925	1.325	2.5	1.275	2.325	4.05	2.6
FBgn0085387	8.9	1.5	1.65	1.55	1.05	0.5	0.65	2.3	1.2	1.05	8.3	1.95
FBgn0085390	3.6	0.85	0.95	1.75	4.35	0.6	5.45	21	5.75	1.8	1.7	0.9
FBgn0085391	18.5	2.65	1.55	0.55	0.55	0.4	0.3	1.25	0.9	0.8	21.1	1.9
FBgn0085395	3.3	1.25	1.75	1	1.25	0.6	1.95	2.25	1.45	1.65	4.25	1.3
FBgn0085397	2.8	2.26667	1.23333	1.26667	1.4	0.5	1.2	1.33333	1.13333	2.06667	1.96667	2.86667
FBgn0085398	0.5	1	2.05	2.15	1.25	0.8	0.9	1.9	0.95	1.15	1.4	2.15
FBgn0085399	12.94	2.88	1.38	0.54	1.34	0.48	0.74	1.68	1.24	1.54	7.02	2.54
FBgn0085405	1.7	1.95	1.95	0.75	0.25	0.5	2.45	1.4	0.25	4.1	1.45	2.4
FBgn0085407	7.8	2.96667	1.53333	0.466667	0.866667	0.3	0.466667	3.56667	1.7	1.06667	3.2	2.2
FBgn0085408	0.6	1.06667	2.53333	1.6	2.73333	0.666667	0.766667	2.3	4.03333	1.6	0.933333	1.56667
FBgn0085412	3	1.6	1.46667	1.93333	1.63333	0.866667	0.5	1.9	1.23333	1.6	3.93333	1.43333
FBgn0085413	13.7	3.375	1.25	2.575	2.2	0.35	7.175	1.4	2.075	2	5.475	2.75
FBgn0085415	0.25	0.3	10.4	0.4	0.4	0.1	1	0.4	0.45	0.8	0.35	0.4
FBgn0085420	2.95	0.95	1.25	1.05	0.9	0.7	2.45	1.15	0.85	1.55	3.1	0.9
FBgn0085424	0.933333	1.33333	6.23333	1.9	1.06667	0.366667	0.933333	0.633333	0.966667	1.3	0.666667	1
FBgn0085426	3.25	1.025	1.825	2.425	1.1	0.7	1.15	1.225	1.25	3.15	1.075	2.325
FBgn0085431	12.1667	3.86667	1.43333	2.3	1.46667	0.366667	1.03333	2.36667	1.73333	1.1	2.8	3.76667
FBgn0085432	7.9	0.75	0.5	1	0.2	1.1	0.65	0.6	0.6	1.1	4.25	2.1
FBgn0085434	20.4	2.15	1.4	1.4	0.7	0.8	0.85	2	1	0.45	12.95	0.85
FBgn0085440	10.3	3.3	6.05	4.15	3.2	2.1	3.15	5.35	3.3	4.65	16.3	8.5
FBgn0085443	1.225	0.875	0.475	1.025	3.125	1.725	0.875	1.175	1.075	0.55	1.025	0.875
FBgn0085446	0.666667	1.53333	1.46667	4.76667	2.2	0.233333	0.566667	0.866667	1.06667	1.06667	1	3.26667
FBgn0085450	3	1.2	1.36667	1.8	1.83333	0.566667	1.26667	1.4	1.5	1.56667	2.03333	2.2
FBgn0085478	0.6	0.15	0.25	0.25	0.4	3.95	0.75	0.2	0.3	0.35	0.3	0.25
FBgn0086254	0.35	0.75	1	3.55	2.6	1.45	0.9	0.75	0.45	0.15	0.5	0.85
FBgn0086361	0.733333	0.6	0.833333	0.966667	0.3	1.4	1.56667	0.7	1	1	0.566667	0.7
FBgn0086604	29.05	6.5	2.2	1.6	1.25	0.6	1.25	4.2	1.5	4	27.7	2
FBgn0086655	0.7	0.6	0.9	0.9	0.6	1.8	0.65	0.9	1.05	2	0.75	1.25
FBgn0086690	1.6	1.2	0.466667	0.966667	0.466667	0.733333	0.566667	1.1	0.6	2.7	1.7	3.13333
FBgn0086758	10.3	1.66667	0.8	1.4	2.03333	0.433333	6.23333	1.63333	4.4	2.93333	6.96667	1.6
FBgn0086906	0	0.8	0.433333	1.96667	0.3	0.0333333	1.06667	0.933333	0.3	0.0666667	0.0666667	3.4
FBgn0086908	1.2	0.55	0.5	0.55	0.7	1.45	0.45	0.6	0.7	0.8	0.9	0.45
FBgn0087007	0.6	1.25	5.2	2.3	0.65	0.7	1.6	1	0.8	0.75	0.65	1.25
FBgn0087011	1.36667	2.3	1.36667	3.9	0.766667	0.566667	1.6	3.83333	0.8	1.16667	1.46667	2.76667
FBgn0243486	13.1	4.85	1.4	0.55	1.05	0.55	2.4	1.05	1.2	1.65	8.7	1.6
FBgn0250757	2.88	0.8	0.22	0.12	46.84	0.06	0.12	0.18	54.3	0.28	4.22	0.34
FBgn0250908	40.3	7.25	3.85	1.25	1.1	0.7	3.2	5.3	0.6	1.8	24.35	1.05
FBgn0259099	3.3	3.15	3.35	2.6	2.55	1.4	1.8	2.95	1.65	4.8	3.4	7.05
FBgn0259110	40.7	6.35	1.15	1	1.25	0.45	0.75	2.3	1.35	2	24.25	2.75
FBgn0259111	7.2	5.55	1.1	2.1	2.85	0.1	3.9	0.4	8.9	0.9	3.9	2
FBgn0259140	1.15	1.95	2.8	2.15	2.35	1.45	0.95	2.2	8.15	5.7	1.15	14.65
FBgn0259143	1.55	1	0.7	3.05	0.7	1.55	0.4	0.4	0.65	0.3	1.45	0.9
FBgn0259145	7.3	1.3	3.85	1.55	2.4	1.8	2.3	4.35	1.45	6.45	6.3	3.55
FBgn0259146	2.8	1.05	1.85	0.65	0.75	0.3	1.45	1.45	0.7	1.3	2.75	1.15
FBgn0259162	2.25	1.35	1.15	0.85	1.75	0.7	0.95	1.7	1.65	1.65	2.2	2.2
FBgn0259163	4.15	2	1.7	1.85	1.5	0.35	0.4	2.1	1.1	0.45	3.6	0.95
FBgn0259168	1.675	0.8	1.15	1.15	1.1	2.25	0.5	0.8	1.75	1.275	1.05	1.1
FBgn0259170	2.2	2.1	0.35	4.2	0.5	1.8	0.95	1.45	0.25	0.6	1.15	2.2
FBgn0259171	8.95	3.3	1.8	1.3	1.4	0.6	1.75	1.45	3.3	4.45	8.95	3.4
FBgn0259175	1.1	1.25	4.65	9.55	5.5	0.15	0.95	0.75	22.25	1.05	1.1	1.9
FBgn0259176	4.8	1.2	2.05	2.45	1.25	1.25	0.8	1.25	1.95	1.65	4.45	1.4
FBgn0259209	0.0333333	0.7	0.733333	1.23333	0.0333333	0.0666667	0.166667	0.466667	0.0666667	0.0666667	0.1	3.8
FBgn0259212	2.15	1.4	1.35	2.95	3.55	3.55	1.05	3.2	3.8	2.45	2.95	1.45
FBgn0259213	6.36	1.58	1	1.28	0.98	0.52	2.28	1.92	0.66	1.54	4.86	1.68
FBgn0259214	4.25	1.85	0.8	1.95	6.8	0.6	0.25	1.1	5.45	0.65	5.55	2.05
FBgn0259219	1.55	4.15	0.8	1.35	1.35	0.45	1.15	1.1	0.85	1.6	1.25	6.05
FBgn0259224	1.75	1.45	1.75	1.35	4.35	0.7	0.75	0.4	14.75	7.5	1.7	4.2
FBgn0259234	3.1	1.35	1.75	1.5	2.125	2.35	1.35	1.925	1.975	1.7	2.075	2.05
FBgn0259236	0.5	1.1	1.8	20.8	26.6	0.3	1	12.95	102.8	0.7	0.8	2.5
FBgn0259237	0.1	0.1	15.7	1.55	0.5	0	0.05	0.1	1.25	0.1	0.05	0.1
FBgn0259241	25.8	4.5	1.45	1.3	1.2	1.3	2.15	2.4	1.9	1.55	2.3	1.4
FBgn0259242	4.8	1.15	0.6	0.9	1.25	0.7	1.6	1.4	2.75	1.65	2.65	2.75
FBgn0259243	9.75	1.85	1.05	1.05	0.85	0.65	0.65	2	2.05	1.1	4.45	1.45
FBgn0259244	18.175	5.2	1.2	1.375	1.5	0.775	0.875	1.425	0.725	1.25	19.575	2.025
FBgn0259245	7.33333	1.5	1.4	1.86667	1.8	1.4	4.1	2.86667	2.8	4.16667	2.43333	1.26667
FBgn0259680	0.1	0.75	0.3	0.95	0.25	0.1	0.15	0.45	0.2	0.2	0.25	3.5
FBgn0259683	1.45	2	1.05	1.15	1.75	0.55	1.8	1.05	1.35	2	1.45	1.95
FBgn0259714	2.65	1.75	2.3	2.05	1.7	0.8	1.9	1.85	1.3	2.6	3.35	2.75
FBgn0259734	0.233333	0.966667	1.06667	1.96667	1.73333	1.56667	0.433333	1.76667	2.06667	0.4	0.566667	2
FBgn0259735	5.7	1.35	1.35	2	1.1	1.7	0.75	2.85	1.9	0.85	2.85	3.2
FBgn0259818	6.5	1.95	0.75	0.7	0.9	0.9	3.3	2.3	0.9	1.8	5.85	2.9
FBgn0259822	11	1.53333	1.26667	2.96667	0.633333	0.333333	0.9	1.13333	1.06667	1	6.43333	2.5
FBgn0259878	1.25	1.95	0.55	2.25	0.4	0.8	0.55	0.55	0.35	0.6	0.7	0.4
FBgn0259935	7.45	2.3	2.15	1.6	1.45	0.7	2.1	1.1	0.95	1.15	4.3	2.25
FBgn0259994	40.8	5.3	0.25	3.8	0.35	0.4	0.5	0.6	0.45	0.5	26.8	0.55
FBgn0260003	1.66	0.88	1.18	1.78	1.88	0.76	0.74	1.3	3.38	1.38	1.22	0.96
FBgn0260486	3.05	1.55	0.45	1.45	1.15	1	0.5	2.45	0.65	0.25	2.95	1.35
FBgn0260642	0.433333	0.8	1.26667	2.63333	1.3	0.5	0.333333	1.36667	0.633333	3.56667	20.0667	2.23333
FBgn0260657	22.6	5.06667	0.766667	0.3	0.233333	0.1	0.2	0.333333	0.333333	0.3	8.06667	0.466667
FBgn0260658	22.3667	3.46667	1.2	1.43333	1.9	0.666667	0.833333	1.83333	1.13333	1.9	6.26667	1.93333
[truncated: 22 more rows]
